# Supplementary material
Source: publisher figshare collection journal article supplement (https://acs.figshare.com/ndownloader/files/3769711)
Supplement: Supplementary file 1 [file 3769711]

#=======================================================================
data_global
#=======================================================================

_audit_creation_method                   'Jana2006 Version : 19/03/2015'


# 1. PROCESSING SUMMARY (IUCr Office Use Only)

_journal_date_recd_electronic            ?
_journal_date_to_coeditor                ?
_journal_date_from_coeditor              ?
_journal_date_accepted                   ?
_journal_date_printers_first             ?
_journal_date_printers_final             ?
_journal_date_proofs_out                 ?
_journal_date_proofs_in                  ?
_journal_coeditor_name                   ?
_journal_coeditor_code                   ?
_journal_coeditor_notes
; ?
;
_journal_techeditor_code                 ?
_journal_paper_category                  ?
_journal_techeditor_notes
; ?
;
_journal_coden_ASTM                      ?
_journal_name_full                       'Acta Crystallographica Section C'
_journal_year                            ?
_journal_volume                          ?
_journal_issue                           ?
_journal_page_first                      ?
_journal_page_last                       ?
_journal_suppl_publ_number               ?
_journal_suppl_publ_pages                ?

#=======================================================================

# 2. SUBMISSION DETAILS

_publ_contact_author_name                ?
_publ_contact_author_address
; ?
;
_publ_contact_author_email               ?
_publ_contact_author_fax                 ?
_publ_contact_author_phone               ?

_publ_requested_journal                  'Acta Crystallographica Section C'
_publ_requested_category                 ?

_publ_contact_letter
; ?
;

#=======================================================================

# 3. TITLE AND AUTHOR LIST

_publ_section_title
; ?
;
_publ_section_title_footnote
; ?
;
loop_
 _publ_author_name
 _publ_author_footnote
 _publ_author_address
; ?      # name
;
; ?      # footnote
;
; ?      # address
;

#=======================================================================

# 4. TEXT

_publ_section_synopsis
; ?
;
_publ_section_abstract
; ?
;
_publ_section_comment
; ?
;
_publ_section_introduction
; ?
;
_publ_section_experimental
; ?
;
_publ_section_exptl_prep
; ?
;
_publ_section_exptl_refinement
; ?
;
_publ_section_exptl_solution
; ?
;
_publ_section_discussion
; ?
;
_publ_section_acknowledgements
; ?
;
_publ_section_references
;
Petricek, V., Dusek, M. & Palatinus L. (2014). Z. Kristallogr. 229(5), 345-352.

Palatinus L. & Chapuis G. (2007). J. Appl. Cryst. 40, 786-790.

# enable this reference if Diamond ver. 2 was used for visualization
#Brandenburg, K. (1999). DIAMOND. Version. 2.1c.
#Crystal Impact GbR, Bonn, Germany.

# enable this reference if Diamond ver. 3 was used for visualization
#Brandenburg, K. & Putz, H. (2005). DIAMOND Version 3.
#Crystal Impact GbR, Postfach 1251, D-53002 Bonn, Germany.

# enable this reference if SIR97 was used for solving of the structure
#Altomare, A., Burla, M. C., Camalli, M., Cascarano, G., Giacovazzo, C.,
#Guagliardi, A., Moliterni, A. G. G., Polidori, G., Spagna, R. (1997).
#SIR97. A Package for Crystal Structure Solution by Direct Methods
#and Refinement, Bari, Rome, Italy.

# use this reference if SIR2002 was used for solving of the structure
#Burla, M.C., Camalli, M., Carrozzini, B., Cascarano, G., Giacovazzo, C.,
#Polidori, G., Spagna, R.
#SIR2002: the program, J. Appl. Cryst, (2003). 36, 1103


# use this reference if SIR2011 was used for solving of the structure
#Burla, M.C., Caliandro, R., Camalli, M., Carrozzini, B., Cascarano,
#G.L., Giacovazzo, C., Mallamo. M., Mazzone, A., Polidori, G., Spagna, R.
#SIR2011: a new package for crystal structure determination and refinement,
#J.Appl.Cryst. (2012) 45, 357-361

# enable this reference if bond valences were calculated
#Brown, I. D. (1996). J. Appl. Cryst. 29, 479-480.

# enable this reference if Xshape wase used for crystal shape refinement
#Stoe & Cie (1998). X-SHAPE. Stoe & Cie, Darmstadt, Germany.


# enable this reference if Flack coefficient was refined
#Flack, H. D. (1983). Acta Cryst. A39, 876-881.
;
_publ_section_figure_captions
; ?
;
_publ_section_table_legends
; ?
;

#=======================================================================
data_I
#=======================================================================

# 5. CHEMICAL DATA

_chemical_name_systematic
; ?
;
_chemical_name_common                    ?
_chemical_formula_moiety                 ?
_chemical_formula_structural             ?
_chemical_formula_analytical             ?
_chemical_formula_iupac                  ?
_chemical_formula_sum                    'Ba1 Fe1.333 O8 P2'
_chemical_formula_weight                 401.7
_chemical_melting_point                  ?
_chemical_compound_source                ?
_chemical_absolute_configuration         .

#=======================================================================

# 6. CRYSTAL DATA

_symmetry_cell_setting                   triclinic
_symmetry_space_group_name_H-M           'P -1'
_symmetry_space_group_name_Hall          '-P 1'
_symmetry_Int_Tables_number              2

loop_
 _space_group_symop_id
 _space_group_symop_operation_xyz
 1   x,y,z
 2   -x,-y,-z

_cell_length_a                           8.241(2)
_cell_length_b                           9.6426(10)
_cell_length_c                           12.700(3)
_cell_angle_alpha                        78.197(11)
_cell_angle_beta                         77.508(12)
_cell_angle_gamma                        73.469(10)
_cell_volume                             933.5(3)

loop_
 _twin_individual_id
 _twin_individual_mass_fraction_refined
 _twin_individual_twin_matrix_11
 _twin_individual_twin_matrix_12
 _twin_individual_twin_matrix_13
 _twin_individual_twin_matrix_21
 _twin_individual_twin_matrix_22
 _twin_individual_twin_matrix_23
 _twin_individual_twin_matrix_31
 _twin_individual_twin_matrix_32
 _twin_individual_twin_matrix_33
1 0.31(3)
1 0 0
0 1 0
0 0 1
2 0.531(18)
-0.5 -1 0.5024
0.4995 0.6671 1.1673
-0.4995 0.3329 -0.1673
3 0.163(19)
-0.5 0 -1.5015
-0.4995 0.3346 0.8344
0.4995 0.6654 0.1656

_cell_formula_units_Z                    6

_cell_measurement_reflns_used            ?
_cell_measurement_theta_min              ?
_cell_measurement_theta_max              ?
_cell_measurement_temperature            293
_cell_special_details
; ?
;

_exptl_crystal_density_diffrn            4.2875
_exptl_crystal_density_meas              ?
_exptl_crystal_density_method            ?
_exptl_crystal_F_000                     1108

_exptl_absorpt_coefficient_mu            9.887
_exptl_crystal_description               Platelet
_exptl_crystal_size_max                  0.08
_exptl_crystal_size_mid                  0.04
_exptl_crystal_size_min                  0.01
_exptl_crystal_size_rad                  ?
_exptl_crystal_colour                    Colorless
_exptl_absorpt_correction_type           'multi-scan'
_exptl_absorpt_process_details           'Bruker SADABS'
_exptl_absorpt_correction_T_min          0.6263
_exptl_absorpt_correction_T_max          0.7464
loop_
 _exptl_crystal_face_index_h
 _exptl_crystal_face_index_k
 _exptl_crystal_face_index_l
 _exptl_crystal_face_perp_dist
 ? ? ? ?

#=======================================================================

# 7. EXPERIMENTAL DATA

_exptl_special_details                   ?

_diffrn_ambient_temperature              293
_diffrn_source                           ?
_diffrn_source_power                     ?
_diffrn_source_voltage                   ?
_diffrn_source_current                   ?
_diffrn_radiation_type                   'Mo K\a'
_diffrn_radiation_source                 'X-ray tube'
_diffrn_radiation_wavelength             0.71073
_diffrn_radiation_monochromator          ?
_diffrn_measurement_device               ?
_diffrn_measurement_device_type          ?
_diffrn_detector                         ?
_diffrn_detector_area_resol_mean         ?
_diffrn_measurement_method               ?
_diffrn_measurement_specimen_support     ?

_diffrn_reflns_number                    15355
_diffrn_reflns_theta_min                 1.66
_diffrn_reflns_theta_max                 33.44
_diffrn_reflns_theta_full                33.32
_diffrn_measured_fraction_theta_max      0.98
_diffrn_measured_fraction_theta_full     0.98
_diffrn_reflns_av_R_equivalents          0.0759
_diffrn_reflns_av_unetI/netI             0.1862
_diffrn_reflns_limit_h_min               -12
_diffrn_reflns_limit_h_max               12
_diffrn_reflns_limit_k_min               -14
_diffrn_reflns_limit_k_max               13
_diffrn_reflns_limit_l_min               -17
_diffrn_reflns_limit_l_max               19
_diffrn_reflns_reduction_process         ?

_diffrn_standards_number                 ?
_diffrn_standards_interval_count         ?
_diffrn_standards_interval_time          ?
_diffrn_standards_decay_%                ?
loop_
_diffrn_standard_refln_index_h
_diffrn_standard_refln_index_k
_diffrn_standard_refln_index_l
  ? ? ?

_diffrn_radiation_probe                  X-ray

#=======================================================================

# 8. REFINEMENT DATA

_refine_special_details
; ?
;

_reflns_number_total                     5304
_reflns_number_gt                        1537
_reflns_threshold_expression             'I>3\s(I)'

_refine_ls_structure_factor_coef         F
_refine_ls_R_factor_gt                   0.0596
_refine_ls_wR_factor_gt                  0.0606
_refine_ls_R_factor_all                  0.2038
_refine_ls_wR_factor_ref                 0.1480
_refine_ls_goodness_of_fit_ref           1.81
_refine_ls_goodness_of_fit_gt            1.39
_refine_ls_restrained_S_gt               ?
_refine_ls_restrained_S_all              ?
_refine_ls_number_reflns                 5304
_refine_ls_number_parameters             169
_refine_ls_number_restraints             0
_refine_ls_number_constraints            0
_refine_ls_weighting_scheme              unit
_refine_ls_weighting_details             ?
_refine_ls_hydrogen_treatment            ?
_refine_ls_shift/su_max                  0.0019
_refine_ls_shift/su_mean                 0.0002
_refine_diff_density_max                 8.01
_refine_diff_density_min                 -6.00
_refine_ls_extinction_method             'none'
_refine_ls_extinction_coef               ?
_refine_ls_abs_structure_details         ?
_refine_ls_abs_structure_Flack           ?
_refine_ls_abs_structure_Rogers          ?

loop_
 _atom_type_symbol
 _atom_type_scat_dispersion_real
 _atom_type_scat_dispersion_imag
 _atom_type_scat_source
 Ba  -0.3244  2.2819
 'International Tables Vol C tables 4.2.6.8 and 6.1.1.1'
 Fe   0.3463  0.8444
 'International Tables Vol C tables 4.2.6.8 and 6.1.1.1'
 O    0.0106  0.0060
 'International Tables Vol C tables 4.2.6.8 and 6.1.1.1'
 P    0.1023  0.0942
 'International Tables Vol C tables 4.2.6.8 and 6.1.1.1'

_computing_data_collection               ?
_computing_cell_refinement               ?
_computing_data_reduction                ?
_computing_structure_solution            ?
_computing_structure_refinement          ?
_computing_molecular_graphics            ?
_computing_publication_material          ?

loop_
 _restr_distance_atom_site_label_1
 _restr_distance_site_symmetry_1
 _restr_distance_atom_site_label_2
 _restr_distance_site_symmetry_2
 _restr_distance_target
 _restr_distance_target_weight_param
 ? ? ? ? ? ?

loop_
 _restr_angle_atom_site_label_1
 _restr_angle_site_symmetry_1
 _restr_angle_atom_site_label_2
 _restr_angle_site_symmetry_2
 _restr_angle_atom_site_label_3
 _restr_angle_site_symmetry_3
 _restr_angle_target
 _restr_angle_target_weight_param
 ? ? ? ? ? ? ? ?

loop_
 _restr_torsion_atom_site_label_1
 _restr_torsion_site_symmetry_1
 _restr_torsion_atom_site_label_2
 _restr_torsion_site_symmetry_2
 _restr_torsion_atom_site_label_3
 _restr_torsion_site_symmetry_3
 _restr_torsion_atom_site_label_4
 _restr_torsion_site_symmetry_4
 _restr_torsion_angle_target
 _restr_torsion_weight_param
 ? ? ? ? ? ? ? ? ? ?

loop_
 _restr_equal_distance_atom_site_label_1
 _restr_equal_distance_site_symmetry_1
 _restr_equal_distance_atom_site_label_2
 _restr_equal_distance_site_symmetry_2
 _restr_equal_distance_class_class_id
 _restr_equal_distance_class_target_weight_param
 ? ? ? ? ? ?

loop_
 _restr_equal_angle_atom_site_label_1
 _restr_equal_angle_site_symmetry_1
 _restr_equal_angle_atom_site_label_2
 _restr_equal_angle_site_symmetry_2
 _restr_equal_angle_atom_site_label_3
 _restr_equal_angle_site_symmetry_3
 _restr_equal_angle_class_class_id
 _restr_equal_angle_class_target_weight_param
 ? ? ? ? ? ? ? ?

loop_
 _restr_equal_torsion_atom_site_label_1
 _restr_equal_torsion_site_symmetry_1
 _restr_equal_torsion_atom_site_label_2
 _restr_equal_torsion_site_symmetry_2
 _restr_equal_torsion_atom_site_label_3
 _restr_equal_torsion_site_symmetry_3
 _restr_equal_torsion_atom_site_label_4
 _restr_equal_torsion_site_symmetry_4
 _restr_equal_torsion_class_class_id
 _restr_equal_torsion_class_target_weight_param
 ? ? ? ? ? ? ? ? ? ?


#=======================================================================

# 9. ATOMIC COORDINATES AND DISPLACEMENT PARAMETERS

loop_
 _atom_site_label
 _atom_site_type_symbol
 _atom_site_fract_x
 _atom_site_fract_y
 _atom_site_fract_z
 _atom_site_adp_type
 _atom_site_U_iso_or_equiv
 _atom_site_site_symmetry_multiplicity
 _atom_site_occupancy
 _atom_site_calc_flag
 _atom_site_refinement_flags
 _atom_site_disorder_assembly
 _atom_site_disorder_group
  Ba1 Ba 0 0 0 Uani 0.0152(9) 1 1 d . . .
  Ba2 Ba -0.5 -0.5 0.5 Uani 0.0152(10) 1 1 d . . .
  Ba3 Ba -0.4885(3) -0.1557(3) 0.16626(18) Uani 0.0155(7) 2 1 d . . .
  Ba4 Ba 0.0212(3) -0.3482(2) 0.32239(19) Uani 0.0133(7) 2 1 d . . .
  Fe1 Fe -0.6486(7) 0.1795(6) 0.3250(4) Uiso 0.0138(10) 2 1 d . . .
  Fe2 Fe -0.1473(7) 0.3258(5) 0.1797(4) Uiso 0.0104(9) 2 1 d . . .
  Fe3 Fe -0.1860(7) 0.0232(6) 0.4874(4) Uiso 0.0130(10) 2 1 d . . .
  Fe4 Fe 0.3153(7) -0.5117(6) 0.0169(4) Uiso 0.0131(10) 2 1 d . . .
  P1 P -0.4254(12) -0.1479(9) 0.4242(7) Uiso 0.0072(13) 2 1 d . . .
  P2 P -0.0813(13) -0.3567(10) 0.0744(8) Uiso 0.0126(15) 2 1 d . . .
  P3 P -0.5570(10) -0.5180(8) 0.2355(6) Uiso 0.0044(13) 2 1 d . . .
  P4 P 0.0812(12) 0.0185(10) 0.2664(8) Uiso 0.0107(15) 2 1 d . . .
  P5 P -0.4124(11) 0.1905(9) 0.0908(7) Uiso 0.0065(13) 2 1 d . . .
  P6 P -0.0588(13) 0.3116(10) 0.4093(8) Uiso 0.0133(16) 2 1 d . . .
  O1 O 0.150(4) -0.122(3) 0.208(2) Uiso 0.016(5) 2 1 d . . .
  O2 O -0.597(3) -0.392(3) 0.295(2) Uiso 0.014(5) 2 1 d . . .
  O3 O -0.402(4) 0.167(3) 0.508(2) Uiso 0.014(5) 2 1 d . . .
  O5 O 0.301(4) -0.495(4) 0.167(3) Uiso 0.025(6) 2 1 d . . .
  O6 O -0.582(3) 0.173(3) 0.164(2) Uiso 0.011(5) 2 1 d . . .
  O7 O 0.209(3) 0.021(3) 0.332(2) Uiso 0.012(5) 2 1 d . . .
  O8 O -0.039(3) 0.152(3) 0.4814(19) Uiso 0.008(4) 2 1 d . . .
  O9 O -0.543(3) 0.339(3) 0.3122(19) Uiso 0.008(4) 2 1 d . . .
  O10 O 0.054(4) 0.162(3) 0.179(2) Uiso 0.014(5) 2 1 d . . .
  O12 O -0.883(3) 0.323(3) 0.344(2) Uiso 0.010(4) 2 1 d . . .
  O13 O 0.096(3) -0.365(3) -0.009(2) Uiso 0.012(5) 2 1 d . . .
  O14 O -0.454(4) 0.345(3) 0.018(2) Uiso 0.018(5) 2 1 d . . .
  O15 O -0.694(3) 0.134(3) 0.4928(19) Uiso 0.008(4) 2 1 d . . .
  O16 O -0.358(3) 0.069(2) 0.0233(17) Uiso 0.004(3) 2 1 d . . .
  O17 O 0.135(3) -0.424(3) 0.5173(19) Uiso 0.010(4) 2 1 d . . .
  O18 O -0.332(3) -0.276(3) 0.370(2) Uiso 0.010(4) 2 1 d . . .
  O19 O -0.188(3) 0.321(2) 0.3336(18) Uiso 0.006(4) 2 1 d . . .
  O20 O -0.089(3) -0.007(3) 0.341(2) Uiso 0.009(4) 2 1 d . . .
  O21 O -0.379(3) 0.475(3) 0.156(2) Uiso 0.009(4) 2 1 d . . .
  O22 O -0.268(3) 0.179(2) 0.1470(19) Uiso 0.007(4) 2 1 d . . .
  O23 O -0.118(4) -0.225(3) 0.132(2) Uiso 0.016(5) 2 1 d . . .
  O24 O -0.060(4) -0.495(3) 0.163(2) Uiso 0.021(6) 2 1 d . . .
  O25 O -0.220(3) -0.341(3) 0.013(2) Uiso 0.010(4) 2 1 d . . .
  O26 O -0.453(4) -0.007(3) 0.338(2) Uiso 0.015(5) 2 1 d . . .

loop_
 _atom_site_aniso_label
 _atom_site_aniso_type_symbol
 _atom_site_aniso_U_11
 _atom_site_aniso_U_22
 _atom_site_aniso_U_33
 _atom_site_aniso_U_12
 _atom_site_aniso_U_13
 _atom_site_aniso_U_23
 Ba1 Ba 0.0111(14) 0.0155(14) 0.0150(14) -0.0036(11) 0.0008(11) 0.0040(10)
 Ba2 Ba 0.0201(16) 0.0152(13) 0.0097(13) -0.0110(12) -0.0062(11) 0.0123(10)
 Ba3 Ba 0.0143(11) 0.0165(10) 0.0122(10) -0.0091(8) -0.0009(8) 0.0118(7)
 Ba4 Ba 0.0105(10) 0.0156(10) 0.0097(9) -0.0046(8) 0.0019(7) 0.0051(7)

loop_
 _jana_atom_site_ADP_C_label
 _jana_atom_site_ADP_C_type_symbol
 _jana_atom_site_ADP_C_111
 _jana_atom_site_ADP_C_112
 _jana_atom_site_ADP_C_113
 _jana_atom_site_ADP_C_122
 _jana_atom_site_ADP_C_123
 _jana_atom_site_ADP_C_133
 _jana_atom_site_ADP_C_222
 _jana_atom_site_ADP_C_223
 _jana_atom_site_ADP_C_233
 _jana_atom_site_ADP_C_333
 ? ? ? ? ? ? ? ? ? ? ? ?

loop_
 _jana_atom_site_ADP_D_label
 _jana_atom_site_ADP_D_type_symbol
 _jana_atom_site_ADP_D_1111
 _jana_atom_site_ADP_D_1112
 _jana_atom_site_ADP_D_1113
 _jana_atom_site_ADP_D_1122
 _jana_atom_site_ADP_D_1123
 _jana_atom_site_ADP_D_1133
 _jana_atom_site_ADP_D_1222
 _jana_atom_site_ADP_D_1223
 _jana_atom_site_ADP_D_1233
 _jana_atom_site_ADP_D_1333
 _jana_atom_site_ADP_D_2222
 _jana_atom_site_ADP_D_2223
 _jana_atom_site_ADP_D_2233
 _jana_atom_site_ADP_D_2333
 _jana_atom_site_ADP_D_3333
 ? ? ? ? ? ? ? ? ? ? ? ? ? ? ? ? ?

loop_
 _jana_atom_site_ADP_E_label
 _jana_atom_site_ADP_E_type_symbol
 _jana_atom_site_ADP_E_11111
 _jana_atom_site_ADP_E_11112
 _jana_atom_site_ADP_E_11113
 _jana_atom_site_ADP_E_11122
 _jana_atom_site_ADP_E_11123
 _jana_atom_site_ADP_E_11133
 _jana_atom_site_ADP_E_11222
 _jana_atom_site_ADP_E_11223
 _jana_atom_site_ADP_E_11233
 _jana_atom_site_ADP_E_11333
 _jana_atom_site_ADP_E_12222
 _jana_atom_site_ADP_E_12223
 _jana_atom_site_ADP_E_12233
 _jana_atom_site_ADP_E_12333
 _jana_atom_site_ADP_E_13333
 _jana_atom_site_ADP_E_22222
 _jana_atom_site_ADP_E_22223
 _jana_atom_site_ADP_E_22233
 _jana_atom_site_ADP_E_22333
 _jana_atom_site_ADP_E_23333
 _jana_atom_site_ADP_E_33333
 ? ? ? ? ? ? ? ? ? ? ? ? ? ? ? ? ? ? ? ? ? ? ?

loop_
 _jana_atom_site_ADP_F_label
 _jana_atom_site_ADP_F_type_symbol
 _jana_atom_site_ADP_F_111111
 _jana_atom_site_ADP_F_111112
 _jana_atom_site_ADP_F_111113
 _jana_atom_site_ADP_F_111122
 _jana_atom_site_ADP_F_111123
 _jana_atom_site_ADP_F_111133
 _jana_atom_site_ADP_F_111222
 _jana_atom_site_ADP_F_111223
 _jana_atom_site_ADP_F_111233
 _jana_atom_site_ADP_F_111333
 _jana_atom_site_ADP_F_112222
 _jana_atom_site_ADP_F_112223
 _jana_atom_site_ADP_F_112233
 _jana_atom_site_ADP_F_112333
 _jana_atom_site_ADP_F_113333
 _jana_atom_site_ADP_F_122222
 _jana_atom_site_ADP_F_122223
 _jana_atom_site_ADP_F_122233
 _jana_atom_site_ADP_F_122333
 _jana_atom_site_ADP_F_123333
 _jana_atom_site_ADP_F_133333
 _jana_atom_site_ADP_F_222222
 _jana_atom_site_ADP_F_222223
 _jana_atom_site_ADP_F_222233
 _jana_atom_site_ADP_F_222333
 _jana_atom_site_ADP_F_223333
 _jana_atom_site_ADP_F_233333
 _jana_atom_site_ADP_F_333333
 ? ? ? ? ? ? ? ? ? ? ? ? ? ? ? ? ? ? ? ? ? ? ? ? ? ? ? ? ? ?


#=======================================================================

# 10. MOLECULAR GEOMETRY


loop_
 _geom_bond_atom_site_label_1
 _geom_bond_atom_site_label_2
 _geom_bond_site_symmetry_1
 _geom_bond_site_symmetry_2
 _geom_bond_distance
 _geom_bond_publ_flag
  Ba1 O1 . . 3.03(3) ?
  Ba1 O1 . 2_555 3.03(3) ?
  Ba1 O10 . . 3.17(3) ?
  Ba1 O10 . 2_555 3.17(3) ?
  Ba1 O16 . . 2.80(2) ?
  Ba1 O16 . 2_555 2.80(2) ?
  Ba1 O22 . . 2.95(2) ?
  Ba1 O22 . 2_555 2.95(2) ?
  Ba1 O23 . . 2.74(3) ?
  Ba1 O23 . 2_555 2.74(3) ?
  Ba2 O2 . . 2.79(3) ?
  Ba2 O2 . 2_446 2.79(3) ?
  Ba2 O3 . 1_545 3.07(3) ?
  Ba2 O3 . 2_456 3.07(3) ?
  Ba2 O9 . 1_545 3.22(3) ?
  Ba2 O9 . 2_456 3.22(3) ?
  Ba2 O17 . 1_455 2.86(3) ?
  Ba2 O17 . 2_546 2.86(3) ?
  Ba2 O18 . . 2.92(2) ?
  Ba2 O18 . 2_446 2.92(2) ?
  Ba2 O19 . 1_545 3.27(2) ?
  Ba2 O19 . 2_456 3.27(2) ?
  Ba3 O1 . 1_455 2.84(3) ?
  Ba3 O2 . . 2.77(3) ?
  Ba3 O6 . . 3.04(3) ?
  Ba3 O7 . 1_455 3.21(2) ?
  Ba3 O16 . . 2.83(2) ?
  Ba3 O16 . 2_455 2.82(2) ?
  Ba3 O18 . . 3.01(3) ?
  Ba3 O23 . . 2.89(3) ?
  Ba3 O25 . . 3.03(2) ?
  Ba3 O26 . . 2.95(3) ?
  Ba4 O1 . . 2.71(3) ?
  Ba4 O2 . 1_655 3.01(3) ?
  Ba4 O5 . . 2.92(3) ?
  Ba4 O12 . 1_645 3.01(2) ?
  Ba4 O17 . . 2.72(3) ?
  Ba4 O17 . 2_546 3.04(2) ?
  Ba4 O18 . . 2.75(2) ?
  Ba4 O20 . . 3.20(3) ?
  Ba4 O23 . . 2.79(3) ?
  Ba4 O24 . . 2.98(4) ?
  Fe1 O6 . . 2.00(3) ?
  Fe1 O7 . 1_455 2.16(3) ?
  Fe1 O9 . . 1.94(3) ?
  Fe1 O12 . . 2.03(2) ?
  Fe1 O15 . . 2.06(2) ?
  Fe1 O26 . . 2.05(3) ?
  Fe2 O10 . . 1.94(2) ?
  Fe2 O13 . 2_555 2.09(3) ?
  Fe2 O19 . . 1.90(2) ?
  Fe2 O21 . . 2.08(2) ?
  Fe2 O22 . . 2.09(3) ?
  Fe2 O24 . 1_565 2.01(4) ?
  Fe3 O3 . . 1.93(2) ?
  Fe3 O7 . 2_556 2.23(3) ?
  Fe3 O8 . . 1.95(3) ?
  Fe3 O8 . 2_556 2.17(2) ?
  Fe3 O15 . 2_456 1.98(3) ?
  Fe3 O20 . . 1.90(2) ?
  Fe4 O5 . . 1.92(4) ?
  Fe4 O13 . . 2.00(2) ?
  Fe4 O14 . 1_645 2.00(3) ?
  Fe4 O14 . 2_555 2.15(3) ?
  Fe4 O21 . 2_555 2.13(2) ?
  Fe4 O25 . 2_545 1.94(3) ?
  P1 O3 . 2_456 1.53(3) ?
  P1 O15 . 2_456 1.64(3) ?
  P1 O18 . . 1.47(3) ?
  P1 O26 . . 1.55(3) ?
  P2 O13 . . 1.60(3) ?
  P2 O23 . . 1.52(3) ?
  P2 O24 . . 1.55(3) ?
  P2 O25 . . 1.47(3) ?
  P3 O2 . . 1.48(3) ?
  P3 O5 . 1_455 1.54(4) ?
  P3 O9 . 1_545 1.50(2) ?
  P3 O21 . 1_545 1.58(2) ?
  P4 O1 . . 1.58(3) ?
  P4 O7 . . 1.48(3) ?
  P4 O10 . . 1.58(3) ?
  P4 O20 . . 1.57(3) ?
  P5 O6 . . 1.54(3) ?
  P5 O14 . . 1.58(3) ?
  P5 O16 . . 1.50(2) ?
  P5 O22 . . 1.48(3) ?
  P6 O8 . . 1.61(2) ?
  P6 O12 . 1_655 1.53(3) ?
  P6 O17 . 2_556 1.49(3) ?
  P6 O19 . . 1.56(3) ?

loop_
 _geom_angle_atom_site_label_1
 _geom_angle_atom_site_label_2
 _geom_angle_atom_site_label_3
 _geom_angle_site_symmetry_1
 _geom_angle_site_symmetry_2
 _geom_angle_site_symmetry_3
 _geom_angle
 _geom_angle_publ_flag
  O1 Ba1 O1 . . 2_555 180.0(5) ?
  O1 Ba1 O10 . . . 49.3(7) ?
  O1 Ba1 O10 . . 2_555 130.7(7) ?
  O1 Ba1 O16 . . . 116.2(7) ?
  O1 Ba1 O16 . . 2_555 63.8(7) ?
  O1 Ba1 O22 . . . 82.1(7) ?
  O1 Ba1 O22 . . 2_555 97.9(7) ?
  O1 Ba1 O23 . . . 63.9(9) ?
  O1 Ba1 O23 . . 2_555 116.1(9) ?
  O1 Ba1 O10 2_555 . . 130.7(7) ?
  O1 Ba1 O10 2_555 . 2_555 49.3(7) ?
  O1 Ba1 O16 2_555 . . 63.8(7) ?
  O1 Ba1 O16 2_555 . 2_555 116.2(7) ?
  O1 Ba1 O22 2_555 . . 97.9(7) ?
  O1 Ba1 O22 2_555 . 2_555 82.1(7) ?
  O1 Ba1 O23 2_555 . . 116.1(9) ?
  O1 Ba1 O23 2_555 . 2_555 63.9(9) ?
  O10 Ba1 O10 . . 2_555 180.0(5) ?
  O10 Ba1 O16 . . . 102.1(7) ?
  O10 Ba1 O16 . . 2_555 77.9(7) ?
  O10 Ba1 O22 . . . 52.7(7) ?
  O10 Ba1 O22 . . 2_555 127.3(7) ?
  O10 Ba1 O23 . . . 100.0(8) ?
  O10 Ba1 O23 . . 2_555 80.0(8) ?
  O10 Ba1 O16 2_555 . . 77.9(7) ?
  O10 Ba1 O16 2_555 . 2_555 102.1(7) ?
  O10 Ba1 O22 2_555 . . 127.3(7) ?
  O10 Ba1 O22 2_555 . 2_555 52.7(7) ?
  O10 Ba1 O23 2_555 . . 80.0(8) ?
  O10 Ba1 O23 2_555 . 2_555 100.0(8) ?
  O16 Ba1 O16 . . 2_555 180.0(5) ?
  O16 Ba1 O22 . . . 49.4(7) ?
  O16 Ba1 O22 . . 2_555 130.6(7) ?
  O16 Ba1 O23 . . . 70.7(7) ?
  O16 Ba1 O23 . . 2_555 109.3(7) ?
  O16 Ba1 O22 2_555 . . 130.6(7) ?
  O16 Ba1 O22 2_555 . 2_555 49.4(7) ?
  O16 Ba1 O23 2_555 . . 109.3(7) ?
  O16 Ba1 O23 2_555 . 2_555 70.7(7) ?
  O22 Ba1 O22 . . 2_555 180.0(5) ?
  O22 Ba1 O23 . . . 82.9(7) ?
  O22 Ba1 O23 . . 2_555 97.1(7) ?
  O22 Ba1 O23 2_555 . . 97.1(7) ?
  O22 Ba1 O23 2_555 . 2_555 82.9(7) ?
  O23 Ba1 O23 . . 2_555 180.0(5) ?
  O2 Ba2 O2 . . 2_446 180.0(5) ?
  O2 Ba2 O3 . . 1_545 103.6(8) ?
  O2 Ba2 O3 . . 2_456 76.4(8) ?
  O2 Ba2 O9 . . 1_545 47.8(7) ?
  O2 Ba2 O9 . . 2_456 132.2(7) ?
  O2 Ba2 O17 . . 1_455 69.1(7) ?
  O2 Ba2 O17 . . 2_546 110.9(7) ?
  O2 Ba2 O18 . . . 65.7(8) ?
  O2 Ba2 O18 . . 2_446 114.3(8) ?
  O2 Ba2 O19 . . 1_545 76.1(6) ?
  O2 Ba2 O19 . . 2_456 103.9(6) ?
  O2 Ba2 O3 2_446 . 1_545 76.4(8) ?
  O2 Ba2 O3 2_446 . 2_456 103.6(8) ?
  O2 Ba2 O9 2_446 . 1_545 132.2(7) ?
  O2 Ba2 O9 2_446 . 2_456 47.8(7) ?
  O2 Ba2 O17 2_446 . 1_455 110.9(7) ?
  O2 Ba2 O17 2_446 . 2_546 69.1(7) ?
  O2 Ba2 O18 2_446 . . 114.3(8) ?
  O2 Ba2 O18 2_446 . 2_446 65.7(8) ?
  O2 Ba2 O19 2_446 . 1_545 103.9(6) ?
  O2 Ba2 O19 2_446 . 2_456 76.1(6) ?
  O3 Ba2 O3 1_545 . 2_456 180.0(5) ?
  O3 Ba2 O9 1_545 . 1_545 55.9(7) ?
  O3 Ba2 O9 1_545 . 2_456 124.1(7) ?
  O3 Ba2 O17 1_545 . 1_455 103.1(8) ?
  O3 Ba2 O17 1_545 . 2_546 76.9(8) ?
  O3 Ba2 O18 1_545 . . 131.0(6) ?
  O3 Ba2 O18 1_545 . 2_446 49.0(6) ?
  O3 Ba2 O19 1_545 . 1_545 55.2(6) ?
  O3 Ba2 O19 1_545 . 2_456 124.8(6) ?
  O3 Ba2 O9 2_456 . 1_545 124.1(7) ?
  O3 Ba2 O9 2_456 . 2_456 55.9(7) ?
  O3 Ba2 O17 2_456 . 1_455 76.9(8) ?
  O3 Ba2 O17 2_456 . 2_546 103.1(8) ?
  O3 Ba2 O18 2_456 . . 49.0(6) ?
  O3 Ba2 O18 2_456 . 2_446 131.0(6) ?
  O3 Ba2 O19 2_456 . 1_545 124.8(6) ?
  O3 Ba2 O19 2_456 . 2_456 55.2(6) ?
  O9 Ba2 O9 1_545 . 2_456 180.0(5) ?
  O9 Ba2 O17 1_545 . 1_455 79.0(7) ?
  O9 Ba2 O17 1_545 . 2_546 101.0(7) ?
  O9 Ba2 O18 1_545 . . 101.3(7) ?
  O9 Ba2 O18 1_545 . 2_446 78.7(7) ?
  O9 Ba2 O19 1_545 . 1_545 53.9(7) ?
  O9 Ba2 O19 1_545 . 2_456 126.1(7) ?
  O9 Ba2 O17 2_456 . 1_455 101.0(7) ?
  O9 Ba2 O17 2_456 . 2_546 79.0(7) ?
  O9 Ba2 O18 2_456 . . 78.7(7) ?
  O9 Ba2 O18 2_456 . 2_446 101.3(7) ?
  O9 Ba2 O19 2_456 . 1_545 126.1(7) ?
  O9 Ba2 O19 2_456 . 2_456 53.9(7) ?
  O17 Ba2 O17 1_455 . 2_546 180.0(5) ?
  O17 Ba2 O18 1_455 . . 114.9(6) ?
  O17 Ba2 O18 1_455 . 2_446 65.1(6) ?
  O17 Ba2 O19 1_455 . 1_545 132.8(7) ?
  O17 Ba2 O19 1_455 . 2_456 47.2(7) ?
  O17 Ba2 O18 2_546 . . 65.1(6) ?
  O17 Ba2 O18 2_546 . 2_446 114.9(6) ?
  O17 Ba2 O19 2_546 . 1_545 47.2(7) ?
  O17 Ba2 O19 2_546 . 2_456 132.8(7) ?
  O18 Ba2 O18 . . 2_446 180.0(5) ?
  O18 Ba2 O19 . . 1_545 76.1(6) ?
  O18 Ba2 O19 . . 2_456 103.9(6) ?
  O18 Ba2 O19 2_446 . 1_545 103.9(6) ?
  O18 Ba2 O19 2_446 . 2_456 76.1(6) ?
  O19 Ba2 O19 1_545 . 2_456 180.0(5) ?
  O1 Ba3 O2 1_455 . . 64.9(7) ?
  O1 Ba3 O6 1_455 . . 84.4(8) ?
  O1 Ba3 O7 1_455 . 1_455 48.0(9) ?
  O1 Ba3 O16 1_455 . . 118.0(7) ?
  O1 Ba3 O16 1_455 . 2_455 66.0(7) ?
  O1 Ba3 O18 1_455 . . 112.0(7) ?
  O1 Ba3 O23 1_455 . . 173.5(8) ?
  O1 Ba3 O25 1_455 . . 128.0(9) ?
  O1 Ba3 O26 1_455 . . 100.3(8) ?
  O2 Ba3 O6 . . . 136.2(7) ?
  O2 Ba3 O7 . . 1_455 81.8(7) ?
  O2 Ba3 O16 . . . 175.1(7) ?
  O2 Ba3 O16 . . 2_455 110.2(8) ?
  O2 Ba3 O18 . . . 64.8(8) ?
  O2 Ba3 O23 . . . 108.8(7) ?
  O2 Ba3 O25 . . . 94.2(7) ?
  O2 Ba3 O26 . . . 99.6(8) ?
  O6 Ba3 O7 . . 1_455 54.5(7) ?
  O6 Ba3 O16 . . . 48.7(6) ?
  O6 Ba3 O16 . . 2_455 81.9(7) ?
  O6 Ba3 O18 . . . 103.1(7) ?
  O6 Ba3 O23 . . . 101.8(8) ?
  O6 Ba3 O25 . . . 129.6(7) ?
  O6 Ba3 O26 . . . 54.1(7) ?
  O7 Ba3 O16 1_455 . . 103.1(6) ?
  O7 Ba3 O16 1_455 . 2_455 99.1(6) ?
  O7 Ba3 O18 1_455 . . 82.4(6) ?
  O7 Ba3 O23 1_455 . . 134.7(9) ?
  O7 Ba3 O25 1_455 . . 175.3(8) ?
  O7 Ba3 O26 1_455 . . 52.6(8) ?
  O16 Ba3 O16 . . 2_455 68.9(7) ?
  O16 Ba3 O18 . . . 115.9(7) ?
  O16 Ba3 O23 . . . 68.2(7) ?
  O16 Ba3 O25 . . . 81.0(6) ?
  O16 Ba3 O26 . . . 83.8(7) ?
  O16 Ba3 O18 2_455 . . 174.6(7) ?
  O16 Ba3 O23 2_455 . . 116.4(7) ?
  O16 Ba3 O25 2_455 . . 79.9(6) ?
  O16 Ba3 O26 2_455 . . 135.6(7) ?
  O18 Ba3 O23 . . . 65.0(7) ?
  O18 Ba3 O25 . . . 98.1(6) ?
  O18 Ba3 O26 . . . 49.2(7) ?
  O23 Ba3 O25 . . . 48.9(9) ?
  O23 Ba3 O26 . . . 82.1(8) ?
  O25 Ba3 O26 . . . 130.9(8) ?
  O1 Ba4 O2 . . 1_655 63.4(8) ?
  O1 Ba4 O5 . . . 78.4(9) ?
  O1 Ba4 O12 . . 1_645 138.0(7) ?
  O1 Ba4 O17 . . . 107.6(9) ?
  O1 Ba4 O17 . . 2_546 170.6(8) ?
  O1 Ba4 O18 . . . 113.1(7) ?
  O1 Ba4 O20 . . . 48.4(7) ?
  O1 Ba4 O23 . . . 67.6(10) ?
  O1 Ba4 O24 . . . 107.6(9) ?
  O2 Ba4 O5 1_655 . . 49.0(10) ?
  O2 Ba4 O12 1_655 . 1_645 82.8(7) ?
  O2 Ba4 O17 1_655 . . 67.9(7) ?
  O2 Ba4 O17 1_655 . 2_546 117.1(7) ?
  O2 Ba4 O18 1_655 . . 170.5(8) ?
  O2 Ba4 O20 1_655 . . 97.8(7) ?
  O2 Ba4 O23 1_655 . . 114.8(8) ?
  O2 Ba4 O24 1_655 . . 109.9(8) ?
  O5 Ba4 O12 . . 1_645 60.3(8) ?
  O5 Ba4 O17 . . . 105.5(8) ?
  O5 Ba4 O17 . . 2_546 109.3(8) ?
  O5 Ba4 O18 . . . 140.2(10) ?
  O5 Ba4 O20 . . . 126.7(8) ?
  O5 Ba4 O23 . . . 81.7(8) ?
  O5 Ba4 O24 . . . 61.0(10) ?
  O12 Ba4 O17 1_645 . . 78.9(7) ?
  O12 Ba4 O17 1_645 . 2_546 49.0(6) ?
  O12 Ba4 O18 1_645 . . 103.8(7) ?
  O12 Ba4 O20 1_645 . . 170.6(7) ?
  O12 Ba4 O23 1_645 . . 110.1(8) ?
  O12 Ba4 O24 1_645 . . 59.7(8) ?
  O17 Ba4 O17 . . 2_546 65.5(8) ?
  O17 Ba4 O18 . . . 106.4(7) ?
  O17 Ba4 O20 . . . 92.6(7) ?
  O17 Ba4 O23 . . . 170.6(8) ?
  O17 Ba4 O24 . . . 138.1(8) ?
  O17 Ba4 O18 2_546 . . 64.7(7) ?
  O17 Ba4 O20 2_546 . . 123.7(6) ?
  O17 Ba4 O23 2_546 . . 118.2(9) ?
  O17 Ba4 O24 2_546 . . 81.3(8) ?
  O18 Ba4 O20 . . . 74.6(7) ?
  O18 Ba4 O23 . . . 69.7(7) ?
  O18 Ba4 O24 . . . 79.4(8) ?
  O20 Ba4 O23 . . . 78.2(8) ?
  O20 Ba4 O24 . . . 128.0(7) ?
  O23 Ba4 O24 . . . 50.6(8) ?
  O6 Fe1 O7 . . 1_455 87.0(11) ?
  O6 Fe1 O9 . . . 91.6(11) ?
  O6 Fe1 O12 . . . 105.6(10) ?
  O6 Fe1 O15 . . . 166.5(10) ?
  O6 Fe1 O26 . . . 84.4(10) ?
  O7 Fe1 O9 1_455 . . 173.2(10) ?
  O7 Fe1 O12 1_455 . . 84.7(11) ?
  O7 Fe1 O15 1_455 . . 84.9(11) ?
  O7 Fe1 O26 1_455 . . 81.3(11) ?
  O9 Fe1 O12 . . . 89.2(11) ?
  O9 Fe1 O15 . . . 97.6(11) ?
  O9 Fe1 O26 . . . 105.3(12) ?
  O12 Fe1 O15 . . . 84.4(9) ?
  O12 Fe1 O26 . . . 162.4(11) ?
  O15 Fe1 O26 . . . 83.7(10) ?
  O10 Fe2 O13 . . 2_555 89.4(10) ?
  O10 Fe2 O19 . . . 94.8(11) ?
  O10 Fe2 O21 . . . 166.2(13) ?
  O10 Fe2 O22 . . . 85.0(12) ?
  O10 Fe2 O24 . . 1_565 105.8(13) ?
  O13 Fe2 O19 2_555 . . 170.8(12) ?
  O13 Fe2 O21 2_555 . . 82.6(9) ?
  O13 Fe2 O22 2_555 . . 80.9(11) ?
  O13 Fe2 O24 2_555 . 1_565 82.2(12) ?
  O19 Fe2 O21 . . . 94.7(9) ?
  O19 Fe2 O22 . . . 107.6(10) ?
  O19 Fe2 O24 . . 1_565 88.8(12) ?
  O21 Fe2 O22 . . . 82.7(10) ?
  O21 Fe2 O24 . . 1_565 84.3(12) ?
  O22 Fe2 O24 . . 1_565 159.8(11) ?
  O3 Fe3 O7 . . 2_556 87.2(10) ?
  O3 Fe3 O8 . . . 97.2(12) ?
  O3 Fe3 O8 . . 2_556 162.4(10) ?
  O3 Fe3 O15 . . 2_456 90.8(12) ?
  O3 Fe3 O20 . . . 116.4(11) ?
  O7 Fe3 O8 2_556 . . 89.3(11) ?
  O7 Fe3 O8 2_556 . 2_556 75.2(9) ?
  O7 Fe3 O15 2_556 . 2_456 85.1(11) ?
  O7 Fe3 O20 2_556 . . 156.1(9) ?
  O8 Fe3 O8 . . 2_556 84.7(10) ?
  O8 Fe3 O15 . . 2_456 170.0(10) ?
  O8 Fe3 O20 . . . 90.6(12) ?
  O8 Fe3 O15 2_556 . 2_456 85.9(10) ?
  O8 Fe3 O20 2_556 . . 81.0(10) ?
  O15 Fe3 O20 2_456 . . 91.1(11) ?
  O5 Fe4 O13 . . . 97.7(12) ?
  O5 Fe4 O14 . . 1_645 90.7(13) ?
  O5 Fe4 O14 . . 2_555 84.7(14) ?
  O5 Fe4 O21 . . 2_555 160.3(14) ?
  O5 Fe4 O25 . . 2_545 117.5(13) ?
  O13 Fe4 O14 . . 1_645 171.1(11) ?
  O13 Fe4 O14 . . 2_555 92.2(11) ?
  O13 Fe4 O21 . . 2_555 83.8(10) ?
  O13 Fe4 O25 . . 2_545 87.9(12) ?
  O14 Fe4 O14 1_645 . 2_555 85.6(12) ?
  O14 Fe4 O21 1_645 . 2_555 87.4(10) ?
  O14 Fe4 O25 1_645 . 2_545 90.8(12) ?
  O14 Fe4 O21 2_555 . 2_555 75.6(12) ?
  O14 Fe4 O25 2_555 . 2_545 157.6(11) ?
  O21 Fe4 O25 2_555 . 2_545 82.1(11) ?
  O3 P1 O15 2_456 . 2_456 108.0(15) ?
  O3 P1 O18 2_456 . . 111.8(16) ?
  O3 P1 O26 2_456 . . 110.5(15) ?
  O15 P1 O18 2_456 . . 107.1(14) ?
  O15 P1 O26 2_456 . . 109.2(16) ?
  O18 P1 O26 . . . 110.1(15) ?
  O13 P2 O23 . . . 108.6(17) ?
  O13 P2 O24 . . . 108.8(14) ?
  O13 P2 O25 . . . 109.0(15) ?
  O23 P2 O24 . . . 107.2(17) ?
  O23 P2 O25 . . . 110.1(16) ?
  O24 P2 O25 . . . 113.0(19) ?
  O2 P3 O5 . . 1_455 108.8(17) ?
  O2 P3 O9 . . 1_545 111.7(15) ?
  O2 P3 O21 . . 1_545 108.9(16) ?
  O5 P3 O9 1_455 . 1_545 110.3(18) ?
  O5 P3 O21 1_455 . 1_545 108.9(16) ?
  O9 P3 O21 1_545 . 1_545 108.2(12) ?
  O1 P4 O7 . . . 108.8(16) ?
  O1 P4 O10 . . . 110.1(15) ?
  O1 P4 O20 . . . 102.9(16) ?
  O7 P4 O10 . . . 109.4(17) ?
  O7 P4 O20 . . . 111.3(15) ?
  O10 P4 O20 . . . 114.1(14) ?
  O6 P5 O14 . . . 106.4(14) ?
  O6 P5 O16 . . . 105.7(15) ?
  O6 P5 O22 . . . 116.4(15) ?
  O14 P5 O16 . . . 111.5(15) ?
  O14 P5 O22 . . . 109.2(17) ?
  O16 P5 O22 . . . 107.6(14) ?
  O8 P6 O12 . . 1_655 108.6(13) ?
  O8 P6 O17 . . 2_556 108.9(13) ?
  O8 P6 O19 . . . 105.0(15) ?
  O12 P6 O17 1_655 . 2_556 112.9(17) ?
  O12 P6 O19 1_655 . . 112.0(14) ?
  O17 P6 O19 2_556 . . 109.2(14) ?

loop_
 _geom_torsion_atom_site_label_1
 _geom_torsion_atom_site_label_2
 _geom_torsion_atom_site_label_3
 _geom_torsion_atom_site_label_4
 _geom_torsion_site_symmetry_1
 _geom_torsion_site_symmetry_2
 _geom_torsion_site_symmetry_3
 _geom_torsion_site_symmetry_4
 _geom_torsion
 _geom_torsion_publ_flag
 ? ? ? ? ? ? ? ? ? ?

loop_
 _geom_hbond_atom_site_label_D
 _geom_hbond_atom_site_label_H
 _geom_hbond_atom_site_label_A
 _geom_hbond_site_symmetry_D
 _geom_hbond_site_symmetry_H
 _geom_hbond_site_symmetry_A
 _geom_hbond_distance_DH
 _geom_hbond_distance_HA
 _geom_hbond_distance_DA
 _geom_hbond_angle_DHA
 _geom_hbond_publ_flag
 ? ? ? ? ? ? ? ? ? ? ?


#=======================================================================

# 11. STRUCTURE-FACTOR LIST

loop_
 _refln_index_h
 _refln_index_k
 _refln_index_l
 _refln_F_squared_calc
 _refln_F_squared_meas
 _refln_F_squared_sigma
 _refln_observed_status
 ? ? ? ? ? ? ?

loop_
 _twin_refln_datum_id
 _twin_refln_individual_id
 _twin_refln_index_h
 _twin_refln_index_k
 _twin_refln_index_l
 _twin_refln_F_squared_calc
 _twin_refln_F_squared_meas
 _twin_refln_F_squared_sigma
 _twin_refln_include_status
         1    1   1   0   0      0.01    -94.26     31.42 <
         2    3  -1   0  -3  87228.80  90452.60   3207.45 o
         2    2  -1  -2   1  87228.80  90452.60   3207.45 o
         2    1   2   0   0  87228.80  90452.60   3207.45 o
         3    1   3   0   0     38.72     52.37     54.98 <
         4    3  -2   0  -6  10065.00   9148.42    348.24 o
         4    2  -2  -4   2  10065.00   9148.42    348.24 o
         4    1   4   0   0  10065.00   9148.42    348.24 o
         5    1   5   0   0     55.67     47.13     86.40 <
         6    3  -3   0  -9  22763.90  22892.00    882.38 o
         6    2  -3  -6   3  22763.90  22892.00    882.38 o
         6    1   6   0   0  22763.90  22892.00    882.38 o
         7    1   7   0   0      8.89    233.03    125.68 <
         8    3  -4   0 -12   2175.93   1806.64    285.40 o
         8    2  -4  -8   4   2175.93   1806.64    285.40 o
         8    1   8   0   0   2175.93   1806.64    285.40 o
         9    1   9   0   0      0.49     44.51    188.52 <
        10    3  -5   0 -15   8459.48   8952.05    759.31 o
        10    2  -5 -10   5   8459.48   8952.05    759.31 o
        10    1  10   0   0   8459.48   8952.05    759.31 o
        11    1 -10   1   0     20.99    361.33    345.62 <
        12    1  -9   1   0    176.27    -65.46    230.41 <
        13    1  -8   1   0   2859.38   2846.12    311.58 o
        14    1  -7   1   0    469.52    167.57    120.44 <
        15    1  -6   1   0    905.05    827.39    112.59 o
        16    1  -5   1   0    705.40    596.98    115.21 o
        17    1  -4   1   0     18.18    -18.33     86.40 <
        18    1  -3   1   0    721.00    735.75    157.10 o
        19    1  -2   1   0   3919.00   3893.45    167.57 o
        20    1  -1   1   0      3.96    -26.18     52.37 <
        21    1   0   1   0     10.44     28.80     34.04 <
        22    1   1   1   0     41.67      7.85     39.27 <
        23    1   2   1   0   3107.86   3155.08    178.05 o
        24    1   3   1   0    165.94    157.10     89.02 <
        25    1   4   1   0      0.40    -49.75     78.55 <
        26    1   5   1   0   1905.06   1631.22    162.34 o
        27    1   6   1   0   1041.48    932.12    130.92 o
        28    1   7   1   0     60.25    180.66    146.63 <
        29    1   8   1   0   4969.92   5647.72    400.60 o
        30    1   9   1   0    104.05      2.62    227.79 <
        31    1  10   1   0   1180.79   1091.84    447.73 <
        32    1  11   1   0    736.41    725.28    408.46 <
        33    1 -10   2   0   1012.56    722.66    327.29 <
        34    1  -9   2   0   2125.08   2809.46    371.80 o
        35    1  -8   2   0      0.73     81.17    217.32 <
        36    1  -7   2   0   1154.04   1047.33    188.52 o
        37    1  -6   2   0    606.47    539.38    162.34 o
        38    1  -5   2   0    113.59    -86.40    133.54 <
        39    1  -4   2   0   1377.80   1015.91    369.18 <
        40    1  -3   2   0   2458.27   2969.18    240.89 o
        41    1  -2   2   0      0.55   -130.92     73.31 <
        42    1  -1   2   0   1077.79    866.66    109.97 o
        43    1   0   2   0   1393.26    785.50     91.64 o
        44    1   1   2   0   1103.53   1073.51     94.26 o
        45    1   2   2   0     57.10    149.24     65.46 <
        46    1   3   2   0   3085.10   3838.46    227.79 o
        47    1   4   2   0    493.08    345.62     96.88 o
        48    1   5   2   0    471.71    452.97    109.97 o
        49    1   6   2   0    263.16    259.21    128.30 <
        50    1   7   2   0   1980.68   2660.22    256.60 o
        51    1   8   2   0    865.87    987.11    219.94 o
        52    1   9   2   0    827.14   1107.55    272.31 o
        53    1  10   2   0    181.76    280.16    293.25 <
        54    1  11   2   0      1.73   -450.35    272.31 <
        55    3   3   1  16   1621.68   1513.39    343.00 o
        55    2   6  11  -1   1621.68   1513.39    343.00 o
        55    1  -9   3   0   1621.68   1513.39    343.00 o
        56    1  -8   3   0     40.51     65.46    206.85 <
        57    3   2   1  13   3276.32   3141.99    327.29 o
        57    2   5   9   0   3276.32   3141.99    327.29 o
        57    1  -7   3   0   3276.32   3141.99    327.29 o
        58    1  -6   3   0    180.66    403.22    206.85 <
        59    3   1   1  10  39446.40  39884.90   1733.33 o
        59    2   4   7   1  39446.40  39884.90   1733.33 o
        59    1  -5   3   0  39446.40  39884.90   1733.33 o
        60    1  -4   3   0      1.17    -47.13    209.47 <
        61    3   0   1   7   1663.73   2026.58    293.25 o
        61    2   3   5   2   1663.73   2026.58    293.25 o
        61    1  -3   3   0   1663.73   2026.58    293.25 o
        62    1  -2   3   0     38.68    -57.60     99.50 <
        63    3  -1   1   4 148351.00 131696.00   4754.88 o
        63    2   2   3   3 148351.00 131696.00   4754.88 o
        63    1  -1   3   0 148351.00 131696.00   4754.88 o
        64    1   0   3   0      5.74   -272.31     78.55 <
        65    3  -2   1   1 226170.00 225595.00   7993.74 o
        65    2   1   1   4 226170.00 225595.00   7993.74 o
        65    1   1   3   0 226170.00 225595.00   7993.74 o
        66    1   2   3   0     25.92    191.14     94.26 <
        67    3  -3   1  -2   3474.94   4131.72    259.21 o
        67    2   0  -1   5   3474.94   4131.72    259.21 o
        67    1   3   3   0   3474.94   4131.72    259.21 o
        68    1   4   3   0      1.87    128.30     96.88 <
        69    3  -4   1  -5  17828.90  19257.80    798.59 o
        69    2  -1  -3   6  17828.90  19257.80    798.59 o
        69    1   5   3   0  17828.90  19257.80    798.59 o
        70    1   6   3   0    120.71     15.71    120.44 <
        71    3  -5   1  -8   7060.63   7912.58    489.63 o
        71    2  -2  -5   7   7060.63   7912.58    489.63 o
        71    1   7   3   0   7060.63   7912.58    489.63 o
        72    1   8   3   0      0.01   -125.68    212.08 <
        73    3  -6   1 -11  18408.80  18312.60    984.49 o
        73    2  -3  -7   8  18408.80  18312.60    984.49 o
        73    1   9   3   0  18408.80  18312.60    984.49 o
        74    1  10   3   0      2.51    233.03    274.92 <
        75    3  -7   1 -14  19486.10  17956.50   1275.12 o
        75    2  -4  -9   9  19486.10  17956.50   1275.12 o
        75    1  11   3   0  19486.10  17956.50   1275.12 o
        76    1  -9   4   0    163.18    -44.51    282.78 <
        77    1  -8   4   0    440.36    586.51    269.69 <
        78    1  -7   4   0   2233.15   2356.49    311.58 o
        79    1  -6   4   0      5.14   -442.50    193.76 <
        80    1  -5   4   0      0.71     81.17    172.81 <
        81    1  -4   4   0     40.94    146.63    133.54 <
        82    1  -3   4   0    238.46    316.82    120.44 <
        83    1  -2   4   0   2214.90   1966.36    130.92 o
        84    1  -1   4   0   1819.16   1568.38    125.68 o
        85    1   0   4   0     36.90     65.46     89.02 <
        86    1   1   4   0   1082.88   1544.81    154.48 o
        87    1   2   4   0   1537.74    866.66    130.92 o
        88    1   3   4   0   1190.97   1275.12    164.95 o
        89    1   4   4   0     14.97     57.60    109.97 <
        90    1   5   4   0    249.66    387.51    125.68 o
        91    1   6   4   0    387.10    162.34    136.15 <
        92    1   7   4   0   2793.72   4335.94    416.31 o
        93    1   8   4   0    388.50    549.85    259.21 <
        94    1   9   4   0   2422.18   2374.82    379.66 o
        95    1  10   4   0    185.39   -157.10    379.66 <
        96    1  11   4   0    509.10    882.38    513.19 <
        97    1  -9   5   0    427.45    856.19    356.09 <
        98    1  -8   5   0   2025.05   1992.54    379.66 o
        99    1  -7   5   0    129.64     44.51    251.36 <
       100    1  -6   5   0      3.12    -23.56    217.32 <
       101    1  -5   5   0   2463.38   2327.69    269.69 o
       102    1  -4   5   0    508.76    754.08    185.90 o
       103    1  -3   5   0    555.55    413.70    125.68 o
       104    1  -2   5   0   1982.51   1686.20    144.01 o
       105    1  -1   5   0    604.73    329.91    104.73 o
       106    1   0   5   0     46.62     47.13     99.50 <
       107    1   1   5   0    868.31    497.48    115.21 o
       108    1   2   5   0    562.47    248.74    115.21 <
       109    1   3   5   0     83.92    201.61    144.01 <
       110    1   4   5   0   1671.98   1576.23    217.32 o
       111    1   5   5   0   1736.70   1374.62    198.99 o
       112    1   6   5   0   1393.25   1416.51    225.18 o
       113    1   7   5   0     53.76     49.75    206.85 <
       114    1   8   5   0   1274.06   1437.46    390.13 o
       115    1   9   5   0      2.59   -686.00    311.58 <
       116    1  10   5   0    397.80    654.58    426.79 <
       117    1  11   5   0    524.85   1204.43    523.66 <
       118    3   1   2  17     88.80    230.41    337.76 <
       118    2   7  12   3     88.80    230.41    337.76 <
       118    1  -8   6   0     88.80    230.41    337.76 <
       119    1  -7   6   0    264.13     94.26    264.45 <
       120    3   0   2  14   7392.35   9412.87    612.69 o
       120    2   6  10   4   7392.35   9412.87    612.69 o
       120    1  -6   6   0   7392.35   9412.87    612.69 o
       121    1  -5   6   0    225.97    361.33    222.56 <
       122    3  -1   2  11  15254.30  14440.10    819.53 o
       122    2   5   8   5  15254.30  14440.10    819.53 o
       122    1  -4   6   0  15254.30  14440.10    819.53 o
       123    1  -3   6   0     11.95    -73.31    104.73 <
       124    3  -2   2   8  38496.40  36475.90   1560.52 o
       124    2   4   6   6  38496.40  36475.90   1560.52 o
       124    1  -2   6   0  38496.40  36475.90   1560.52 o
       125    1  -1   6   0    192.40    -78.55    109.97 <
       126    3  -3   2   5 170716.00 161954.00   5794.35 o
       126    2   3   4   7 170716.00 161954.00   5794.35 o
       126    1   0   6   0 170716.00 161954.00   5794.35 o
       127    1   1   6   0     36.83    188.52    123.06 <
       128    3  -4   2   2  17309.70  16979.80    709.57 o
       128    2   2   2   8  17309.70  16979.80    709.57 o
       128    1   2   6   0  17309.70  16979.80    709.57 o
       129    1   3   6   0     74.36    141.39    146.63 <
       130    3  -5   2  -1  10603.90  10722.00    513.19 o
       130    2   1   0   9  10603.90  10722.00    513.19 o
       130    1   4   6   0  10603.90  10722.00    513.19 o
       131    1   5   6   0    105.34    693.86    259.21 <
       132    3  -6   2  -4  12211.30  12931.90    911.18 o
       132    2   0  -2  10  12211.30  12931.90    911.18 o
       132    1   6   6   0  12211.30  12931.90    911.18 o
       133    1   7   6   0    349.56    324.67    390.13 <
       134    3  -7   2  -7   6144.86   4278.34    850.96 o
       134    2  -1  -4  11   6144.86   4278.34    850.96 o
       134    1   8   6   0   6144.86   4278.34    850.96 o
       135    1   9   6   0     58.11    170.19    471.30 <
       136    3  -8   2 -10  17912.40  19407.00   1919.23 o
       136    2  -2  -6  12  17912.40  19407.00   1919.23 o
       136    1  10   6   0  17912.40  19407.00   1919.23 o
       137    1  11   6   0     78.87    387.51    589.12 <
       138    1  -7   7   0     86.89    377.04    335.14 <
       139    1  -6   7   0    173.66    510.57    295.87 <
       140    1  -5   7   0     31.70   -128.30    251.36 <
       141    1  -4   7   0    149.45    494.86    230.41 <
       142    1  -3   7   0    381.75    811.68    146.63 o
       143    1  -2   7   0    872.21    775.02    157.10 o
       144    1  -1   7   0    190.55     94.26    159.72 <
       145    1   0   7   0     96.59     94.26    167.57 <
       146    1   1   7   0     20.06    175.43    144.01 <
       147    1   2   7   0   1430.74   1178.25    191.14 o
       148    1   3   7   0   2050.14   1492.44    243.50 o
       149    1   4   7   0     47.67     91.64    230.41 <
       150    1   5   7   0     25.73   -180.66    214.70 <
       151    1   6   7   0    537.60    521.05    290.63 <
       152    1   7   7   0     37.09    335.14    308.96 <
       153    1   8   7   0   2346.69   3406.44    761.93 o
       154    1   9   7   0    136.23   -115.21    400.60 <
       155    1  10   7   0    194.51   -151.86    544.61 <
       156    1  -6   8   0    405.18    712.18    335.14 <
       157    1  -5   8   0      5.69   -324.67    264.45 <
       158    1  -4   8   0   2019.28   1707.15    505.34 o
       159    1  -3   8   0    831.53    987.11    222.56 o
       160    1  -2   8   0    704.45    513.19    209.47 <
       161    1  -1   8   0     99.17    227.79    198.99 <
       162    1   0   8   0   1287.91   1115.41    225.18 o
       163    1   1   8   0     14.47    164.95    191.14 <
       164    1   2   8   0   1948.20   1607.65    282.78 o
       165    1   3   8   0    615.40    413.70    217.32 <
       166    1   4   8   0   1700.31   2377.44    411.08 o
       167    1   5   8   0   1281.52   1125.88    329.91 o
       168    1   6   8   0    274.92    641.49    322.05 <
       169    1   7   8   0    418.65    353.47    337.76 <
       170    1   8   8   0     54.12    -36.66    408.46 <
       171    1   9   8   0    703.40   -185.90    510.57 <
       172    1  10   8   0    912.94   1196.57    714.80 <
       173    1  -6   9   0    437.70    586.51    384.89 <
       174    3  -2   3  15   7812.02  10656.60   1230.61 o
       174    2   7  11   8   7812.02  10656.60   1230.61 o
       174    1  -5   9   0   7812.02  10656.60   1230.61 o
       175    1  -4   9   0     38.39   -434.64    332.53 <
       176    3  -3   3  12   2025.01   2139.17    298.49 o
       176    2   6   9   9   2025.01   2139.17    298.49 o
       176    1  -3   9   0   2025.01   2139.17    298.49 o
       177    1  -2   9   0     87.66    128.30    219.94 <
       178    3  -4   3   9  28975.50  29304.30   1358.91 o
       178    2   5   7  10  28975.50  29304.30   1358.91 o
       178    1  -1   9   0  28975.50  29304.30   1358.91 o
       179    1   0   9   0     76.65   -178.05    251.36 <
       180    3  -5   3   6  20365.30  19218.50   1220.14 o
       180    2   4   5  11  20365.30  19218.50   1220.14 o
       180    1   1   9   0  20365.30  19218.50   1220.14 o
       181    1   2   9   0     16.74    -26.18    314.20 <
       182    3  -6   3   3    500.23   1010.67    492.24 <
       182    2   3   3  12    500.23   1010.67    492.24 <
       182    1   3   9   0    500.23   1010.67    492.24 <
       183    1   4   9   0      4.17     73.31    269.69 <
       184    3  -7   3   0   3206.73   3183.88    518.43 o
       184    2   2   1  13   3206.73   3183.88    518.43 o
       184    1   5   9   0   3206.73   3183.88    518.43 o
       185    1   6   9   0    755.08    651.96    348.24 <
       186    3  -8   3  -3  10099.80   9818.71    950.45 o
       186    2   1  -1  14  10099.80   9818.71    950.45 o
       186    1   7   9   0  10099.80   9818.71    950.45 o
       187    1   8   9   0    219.44   -212.08    628.40 <
       188    3  -9   3  -6  15961.10  16958.90   1809.26 o
       188    2   0  -3  15  15961.10  16958.90   1809.26 o
       188    1   9   9   0  15961.10  16958.90   1809.26 o
       189    1  -4  10   0     65.84   -136.15    547.23 <
       190    1  -3  10   0     19.94     75.93    547.23 <
       191    1  -2  10   0    756.79    706.95    384.89 <
       192    1  -1  10   0    633.84    233.03    353.47 <
       193    1   0  10   0     77.57    206.85    379.66 <
       194    1   1  10   0    284.72    672.91    387.51 <
       195    1   2  10   0    378.13    -18.33    442.50 <
       196    1   3  10   0    141.24    240.89    492.24 <
       197    1   4  10   0    905.99    898.09    539.38 <
       198    1   5  10   0    355.76    884.99    358.71 <
       199    1   6  10   0     88.28    -60.22    358.71 <
       200    1   7  10   0   1680.21   1248.94    492.24 <
       201    1   8  10   0    120.32    329.91    720.04 <
       202    1   9  10   0    269.73    408.46    701.71 <
       203    1  -3  11   0   1375.76   1186.10    712.18 <
       204    1  -2  11   0    212.18    -28.80    390.13 <
       205    1  -1  11   0    454.95   1144.21    445.11 <
       206    1   0  11   0      1.29    521.05    445.11 <
       207    1   1  11   0    468.29    387.51    487.01 <
       208    1   2  11   0      2.11    282.78    526.28 <
       209    1   3  11   0   1920.76   1735.95    704.33 <
       210    1   4  11   0    889.84     34.04    617.92 <
       211    1   5  11   0   1275.53    788.11    633.63 <
       212    1   6  11   0    260.39    856.19    649.34 <
       213    1   7  11   0      3.76   -539.38    429.40 <
       214    1   8  11   0    107.47    950.45    706.95 <
       215    1  -1  12   0     66.86    112.59    437.26 <
       216    3  -6   4  10   9758.16  10033.40   1272.51 o
       216    2   6   8  14   9758.16  10033.40   1272.51 o
       216    1   0  12   0   9758.16  10033.40   1272.51 o
       217    1   1  12   0      9.91    259.21    560.32 <
       218    3  -7   4   7   1834.49   1246.32    657.20 <
       218    2   5   6  15   1834.49   1246.32    657.20 <
       218    1   2  12   0   1834.49   1246.32    657.20 <
       219    1   3  12   0     15.30   -277.54    492.24 <
       220    3  -8   4   4    229.47    693.86    633.63 <
       220    2   4   4  16    229.47    693.86    633.63 <
       220    1   4  12   0    229.47    693.86    633.63 <
       221    1   5  12   0     96.57    411.08    636.25 <
       222    3  -9   4   1   1796.03   1343.20    754.08 <
       222    2   3   2  17   1796.03   1343.20    754.08 <
       222    1   6  12   0   1796.03   1343.20    754.08 <
       223    1   7  12   0    362.75   1696.67    814.30 <
       224    1   1  13   0     32.18   -314.20    576.03 <
       225    1   2  13   0    557.16   -856.19    513.19 <
       226    1   3  13   0    509.66   1442.70    659.82 <
       227    1   4  13   0    138.69   -696.47    581.27 <
       228    1  -3 -13   1    196.07    861.43    654.58 <
       229    1  -2 -13   1    842.15   1395.57    748.84 <
       230    1  -6 -12   1     90.41    -89.02    617.92 <
       231    1  -5 -12   1     25.79    531.52    654.58 <
       232    1  -4 -12   1    634.73    667.67    717.42 <
       233    1  -3 -12   1      0.88   -316.82    610.07 <
       234    1  -2 -12   1   1101.70   1416.51    651.96 <
       235    1  -1 -12   1    552.39    102.11    573.41 <
       236    1   0 -12   1     13.00   -238.27    510.57 <
       237    1   1 -12   1    341.13   -288.02    458.21 <
       238    3  10  -3   3   2606.62   2037.06    869.28 <
       238    2  -2   1 -17   2606.62   2037.06    869.28 <
       238    1  -8 -11   1   2606.62   2037.06    869.28 <
       239    1  -7 -11   1      7.70   -125.68    439.88 <
       240    3   9  -3   0   1769.31   1919.23    816.92 <
       240    2  -3  -1 -16   1769.31   1919.23    816.92 <
       240    1  -6 -11   1   1769.31   1919.23    816.92 <
       241    1  -5 -11   1    114.98   -764.55    617.92 <
       242    3   8  -3  -3   9251.85   9716.60   1385.09 o
       242    2  -4  -3 -15   9251.85   9716.60   1385.09 o
       242    1  -4 -11   1   9251.85   9716.60   1385.09 o
       243    1  -3 -11   1     69.99   -960.92    471.30 <
       244    3   7  -3  -6  14462.70  12497.30   1531.72 o
       244    2  -5  -5 -14  14462.70  12497.30   1531.72 o
       244    1  -2 -11   1  14462.70  12497.30   1531.72 o
       245    1  -1 -11   1     13.56    497.48    515.81 <
       246    3   6  -3  -9   5647.01   6517.01    727.89 o
       246    2  -6  -7 -13   5647.01   6517.01    727.89 o
       246    1   0 -11   1   5647.01   6517.01    727.89 o
       247    1   1 -11   1      5.05   -387.51    382.27 <
       248    3   5  -3 -12   6479.51   7425.57    730.51 o
       248    2  -7  -9 -12   6479.51   7425.57    730.51 o
       248    1   2 -11   1   6479.51   7425.57    730.51 o
       249    1   3 -11   1    269.13    570.79    699.09 <
       250    1  -8 -10   1   1187.08   1440.08    743.60 <
       251    1  -7 -10   1   1516.30   1173.01    515.81 <
       252    1  -6 -10   1   1525.98   1783.08    468.68 o
       253    1  -5 -10   1    738.99   1411.28    617.92 <
       254    1  -4 -10   1     97.35    -52.37    437.26 <
       255    1  -3 -10   1    840.08    327.29    484.39 <
       256    1  -2 -10   1    446.70    246.12    494.86 <
       257    1  -1 -10   1   1434.94    963.54    418.93 <
       258    1   0 -10   1     48.29     44.51    345.62 <
       259    1   1 -10   1   1753.36   1539.57    426.79 o
       260    1   2 -10   1    144.81      2.62    322.05 <
       261    1   3 -10   1    457.17   1667.87    696.47 <
       262    1   4 -10   1     73.89    183.28    377.04 <
       263    1  -9  -9   1    556.45    175.43    602.21 <
       264    1  -8  -9   1      7.34    343.00    536.76 <
       265    1  -7  -9   1      2.79    -99.50    340.38 <
       266    1  -6  -9   1    622.73    319.44    366.57 <
       267    1  -5  -9   1   1689.91   1707.15    432.02 o
       268    1  -4  -9   1     37.86   -562.94    267.07 <
       269    1  -3  -9   1     86.22   -500.10    340.38 <
       270    1  -2  -9   1    123.38   -240.89    277.54 <
       271    1  -1  -9   1   1027.52   1235.85    345.62 o
       272    1   0  -9   1   1472.90   1285.60    350.86 o
       273    1   1  -9   1    486.66    976.64    269.69 o
       274    1   2  -9   1    108.36     20.95    219.94 <
       275    1   3  -9   1     91.81    363.95    314.20 <
       276    1   4  -9   1    173.71    458.21    343.00 <
       277    1   5  -9   1    188.03    -26.18    345.62 <
       278    1   6  -9   1     72.76     39.27    387.51 <
       279    1 -10  -8   1    508.73   1670.49    746.22 <
       280    3   9  -2   7   4033.93   1893.05    701.71 <
       280    2   0   4 -14   4033.93   1893.05    701.71 <
       280    1  -9  -8   1   4033.93   1893.05    701.71 <
       281    1  -8  -8   1    155.11   -120.44    604.83 <
       282    3   8  -2   4   4268.54   2178.45    505.34 o
       282    2  -1   2 -13   4268.54   2178.45    505.34 o
       282    1  -7  -8   1   4268.54   2178.45    505.34 o
       283    1  -6  -8   1     59.14    921.65    371.80 <
       284    3   7  -2   1   8775.54   8831.61    832.63 o
       284    2  -2   0 -12   8775.54   8831.61    832.63 o
       284    1  -5  -8   1   8775.54   8831.61    832.63 o
       285    1  -4  -8   1    206.79    290.63    274.92 <
       286    3   6  -2  -2  35069.30  35729.60   2050.15 o
       286    2  -3  -2 -11  35069.30  35729.60   2050.15 o
       286    1  -3  -8   1  35069.30  35729.60   2050.15 o
       287    1  -2  -8   1      1.62   -204.23    188.52 <
       288    3   5  -2  -5  37553.20  37874.10   1699.29 o
       288    2  -4  -4 -10  37553.20  37874.10   1699.29 o
       288    1  -1  -8   1  37553.20  37874.10   1699.29 o
       289    1   0  -8   1     11.52    204.23    206.85 <
       290    3   4  -2  -8  22880.00  22428.60   1055.18 o
       290    2  -5  -6  -9  22880.00  22428.60   1055.18 o
       290    1   1  -8   1  22880.00  22428.60   1055.18 o
       291    1   2  -8   1    105.18    -13.09    193.76 <
       292    3   3  -2 -11  19994.40  18836.20   1097.08 o
       292    2  -6  -8  -8  19994.40  18836.20   1097.08 o
       292    1   3  -8   1  19994.40  18836.20   1097.08 o
       293    1   4  -8   1    178.45    -73.31    256.60 <
       294    3   2  -2 -14     80.79   -159.72    264.45 <
       294    2  -7 -10  -7     80.79   -159.72    264.45 <
       294    1   5  -8   1     80.79   -159.72    264.45 <
       295    1   6  -8   1      4.13    329.91    308.96 <
       296    1 -10  -7   1     73.61   -615.31    610.07 <
       297    1  -9  -7   1    654.53   1256.80    586.51 <
       298    1  -8  -7   1   1412.14   1204.43    620.54 <
       299    1  -7  -7   1   3738.54   3683.98    547.23 o
       300    1  -6  -7   1    660.37    908.56    335.14 <
       301    1  -5  -7   1    848.05    672.91    295.87 <
       302    1  -4  -7   1    274.86    408.46    248.74 <
       303    1  -3  -7   1    215.97    301.11    209.47 <
       304    1  -2  -7   1   1762.16    911.18    183.28 o
       305    1  -1  -7   1    109.28    259.21    154.48 <
       306    1   0  -7   1    900.42    837.86    201.61 o
       307    1   1  -7   1    160.35    497.48    191.14 <
       308    1   2  -7   1    794.63    751.46    157.10 o
       309    1   3  -7   1     18.30    -65.46    180.66 <
       310    1   4  -7   1    251.00    337.76    209.47 <
       311    1   5  -7   1   1728.01   1471.50    282.78 o
       312    1   6  -7   1    854.51   1055.18    293.25 o
       313    1   7  -7   1   2255.59   2573.81    390.13 o
       314    1 -10  -6   1   1569.38   1746.42    738.37 <
       315    1  -9  -6   1    174.46    539.38    583.89 <
       316    1  -8  -6   1     28.15   -130.92    390.13 <
       317    1  -7  -6   1     70.32     36.66    369.18 <
       318    1  -6  -6   1    783.64   1120.64    322.05 o
       319    1  -5  -6   1    501.78    450.35    267.07 <
       320    1  -4  -6   1   2439.38   3351.45    432.02 o
       321    1  -3  -6   1     49.39   -130.92    154.48 <
       322    1  -2  -6   1   2755.84   3767.77    282.78 o
       323    1  -1  -6   1   1293.22   1385.09    180.66 o
       324    1   0  -6   1     19.93   -185.90    107.35 <
       325    1   1  -6   1    691.28    898.09    146.63 o
       326    1   2  -6   1    137.12    206.85    117.82 <
       327    1   3  -6   1    166.41    243.50    164.95 <
       328    1   4  -6   1   1400.40   1576.23    227.79 o
       329    1   5  -6   1   1284.46   1916.61    261.83 o
       330    1   6  -6   1     87.69    382.27    217.32 <
       331    1   7  -6   1     21.02    442.50    261.83 <
       332    1   8  -6   1    136.60     94.26    306.34 <
       333    3   8  -1  11   6226.00   6111.17    767.17 o
       333    2   2   7 -11   6226.00   6111.17    767.17 o
       333    1 -10  -5   1   6226.00   6111.17    767.17 o
       334    1  -9  -5   1    124.14     52.37    350.86 <
       335    3   7  -1   8  11101.50  12261.60    992.34 o
       335    2   1   5 -10  11101.50  12261.60    992.34 o
       335    1  -8  -5   1  11101.50  12261.60    992.34 o
       336    1  -7  -5   1     13.91    -41.89    269.69 <
       337    3   6  -1   5  32270.60  30671.00   1437.46 o
       337    2   0   3  -9  32270.60  30671.00   1437.46 o
       337    1  -6  -5   1  32270.60  30671.00   1437.46 o
       338    1  -5  -5   1     41.65    -54.98    157.10 <
       339    3   5  -1   2  81491.10  85085.10   3621.14 o
       339    2  -1   1  -8  81491.10  85085.10   3621.14 o
       339    1  -4  -5   1  81491.10  85085.10   3621.14 o
       340    1  -3  -5   1    213.42    170.19    146.63 <
       341    3   4  -1  -1  81400.60  80819.80   2948.23 o
       341    2  -2  -1  -7  81400.60  80819.80   2948.23 o
       341    1  -2  -5   1  81400.60  80819.80   2948.23 o
       342    1  -1  -5   1      4.77    -73.31    104.73 <
       343    3   3  -1  -4   8451.20   8111.57    337.76 o
       343    2  -3  -3  -6   8451.20   8111.57    337.76 o
       343    1   0  -5   1   8451.20   8111.57    337.76 o
       344    1   1  -5   1     15.87     86.40     96.88 <
       345    3   2  -1  -7  49031.20  42691.80   1408.66 o
       345    2  -4  -5  -5  49031.20  42691.80   1408.66 o
       345    1   2  -5   1  49031.20  42691.80   1408.66 o
       346    1   3  -5   1    268.01    298.49    136.15 <
       347    3   1  -1 -10  10007.60  10405.20    510.57 o
       347    2  -5  -7  -4  10007.60  10405.20    510.57 o
       347    1   4  -5   1  10007.60  10405.20    510.57 o
       348    3   0  -1 -13   1650.81   1704.53    225.18 o
       348    2  -6  -9  -3   1650.81   1704.53    225.18 o
       348    1   6  -5   1   1650.81   1704.53    225.18 o
       349    1   7  -5   1     22.15   -125.68    201.61 <
       350    3  -1  -1 -16   7387.13   7045.91    544.61 o
       350    2  -7 -11  -2   7387.13   7045.91    544.61 o
       350    1   8  -5   1   7387.13   7045.91    544.61 o
       351    1   9  -5   1    368.13    518.43    356.09 <
       352    1 -11  -4   1    294.51    510.57    497.48 <
       353    1 -10  -4   1    384.47    238.27    395.37 <
       354    1  -9  -4   1    122.62    709.57    382.27 <
       355    1  -8  -4   1   1461.67   1125.88    308.96 o
       356    1  -7  -4   1   1723.96   2353.87    332.53 o
       357    1  -6  -4   1   3335.61   5202.61    382.27 o
       358    1  -5  -4   1    101.21    178.05    125.68 <
       359    1  -4  -4   1    772.63    929.51    196.37 o
       360    1  -3  -4   1    396.47    544.61    136.15 o
       361    1  -2  -4   1     24.04    144.01    107.35 <
       362    1  -1  -4   1    594.11    494.86    120.44 o
       363    1   0  -4   1     16.91     23.56     86.40 <
       364    1   1  -4   1   1343.07   1005.44    104.73 o
       365    1   2  -4   1     22.05      7.85     75.93 <
       366    1   3  -4   1    771.95    439.88    280.16 <
       367    1   4  -4   1    446.11    531.52    277.54 <
       368    1   5  -4   1    124.59    167.57    298.49 <
       369    1   6  -4   1   4134.08   5291.63    979.25 o
       370    1   7  -4   1   1998.42   1811.88    348.24 o
       371    1   8  -4   1    927.95   1026.38    285.40 o
       372    1   9  -4   1    129.50    138.77    295.87 <
       373    1 -11  -3   1   2455.47   2935.14    610.07 o
       374    1 -10  -3   1      9.60    -54.98    379.66 <
       375    1  -9  -3   1   1526.91   1301.31    332.53 o
       376    1  -8  -3   1    765.92   1348.44    293.25 o
       377    1  -7  -3   1     13.01    -81.17    188.52 <
       378    1  -6  -3   1      2.64     52.37    125.68 <
       379    1  -5  -3   1   3281.96   4605.63    329.91 o
       380    1  -4  -3   1      0.46    -36.66     94.26 <
       381    1  -3  -3   1    236.50    434.64    109.97 o
       382    1  -2  -3   1     17.78    -26.18     83.79 <
       383    1  -1  -3   1   1767.61   2120.84    162.34 o
       384    1   0  -3   1   3025.46   1822.35    154.48 o
       385    1   1  -3   1   1273.50   1094.46    109.97 o
       386    1   2  -3   1    128.86   -104.73    233.03 <
       387    1   3  -3   1    127.04    151.86    188.52 <
       388    1   4  -3   1    474.72    285.40    238.27 <
       389    1   5  -3   1   2736.57   3574.01    693.86 o
       390    1   6  -3   1    510.30   1042.09    578.65 <
       391    1   7  -3   1     26.58    -57.60    191.14 <
       392    1   8  -3   1    168.63    408.46    212.08 <
       393    1   9  -3   1     23.00     -5.24    293.25 <
       394    1  10  -3   1     74.56    395.37    324.67 <
       395    3   7   0  15   2449.25    761.93    447.73 <
       395    2   4  10  -8   2449.25    761.93    447.73 <
       395    1 -11  -2   1   2449.25    761.93    447.73 <
       396    1 -10  -2   1     21.47    295.87    327.29 <
       397    3   6   0  12   5347.46   5254.98    510.57 o
       397    2   3   8  -7   5347.46   5254.98    510.57 o
       397    1  -9  -2   1   5347.46   5254.98    510.57 o
       398    1  -8  -2   1      6.99   -288.02    193.76 <
       399    3   5   0   9  13346.80  13680.70    636.25 o
       399    2   2   6  -6  13346.80  13680.70    636.25 o
       399    1  -7  -2   1  13346.80  13680.70    636.25 o
       400    1  -6  -2   1    118.67   -157.10    133.54 <
       401    3   4   0   6  34163.70  33307.70   1149.44 o
       401    2   1   4  -5  34163.70  33307.70   1149.44 o
       401    1  -5  -2   1  34163.70  33307.70   1149.44 o
       402    1  -4  -2   1     52.23   -128.30     86.40 <
       403    3   3   0   3 226649.00 256824.00   9114.39 o
       403    2   0   2  -4 226649.00 256824.00   9114.39 o
       403    1  -3  -2   1 226649.00 256824.00   9114.39 o
       404    1  -2  -2   1      4.46    -81.17     70.69 <
       405    3   2   0   0  88217.40  95911.80   3050.35 o
       405    2  -1   0  -3  88217.40  95911.80   3050.35 o
       405    1  -1  -2   1  88217.40  95911.80   3050.35 o
       406    1   0  -2   1      0.07    -36.66     73.31 <
       407    3   1   0  -3   9184.70   7836.64    432.02 o
       407    2  -2  -2  -2   9184.70   7836.64    432.02 o
       407    1   1  -2   1   9184.70   7836.64    432.02 o
       408    1   2  -2   1      4.92   -282.78    159.72 <
       409    3   0   0  -6 181700.00 172773.00   9297.67 o
       409    2  -3  -4  -1 181700.00 172773.00   9297.67 o
       409    1   3  -2   1 181700.00 172773.00   9297.67 o
       410    1   4  -2   1     76.09    162.34    185.90 <
       411    3  -1   0  -9   9231.60   9187.70   1039.47 o
       411    2  -4  -6   0   9231.60   9187.70   1039.47 o
       411    1   5  -2   1   9231.60   9187.70   1039.47 o
       412    1   6  -2   1      2.54    -36.66    146.63 <
       413    3  -2   0 -12   7816.80   7671.69    458.21 o
       413    2  -5  -8   1   7816.80   7671.69    458.21 o
       413    1   7  -2   1   7816.80   7671.69    458.21 o
       414    1   8  -2   1    213.19   -196.37    193.76 <
       415    3  -3   0 -15  17766.10  17634.40    858.81 o
       415    2  -6 -10   2  17766.10  17634.40    858.81 o
       415    1   9  -2   1  17766.10  17634.40    858.81 o
       416    1  10  -2   1    192.63    534.14    324.67 <
       417    1 -10  -1   1    511.77   1112.79    432.02 <
       418    1  -9  -1   1    692.12   1110.17    280.16 o
       419    1  -8  -1   1    846.79   1188.72    225.18 o
       420    1  -7  -1   1   1051.67    795.97    183.28 o
       421    1  -6  -1   1      1.36     39.27    128.30 <
       422    1  -5  -1   1   3581.70   4288.81    251.36 o
       423    1  -4  -1   1     64.48    130.92     86.40 <
       424    1  -3  -1   1    455.58    793.35    115.21 o
       425    1  -2  -1   1    476.80    290.63     70.69 o
       426    1  -1  -1   1    488.04    562.94     62.84 o
       427    1   0  -1   1    512.69    102.11     49.75 <
       428    1   1  -1   1    595.05    560.32    164.95 o
       429    1   2  -1   1   1266.57   1123.26    183.28 o
       430    1   3  -1   1    124.87   -324.67    141.39 <
       431    1   4  -1   1     79.40    225.18    170.19 <
       432    1   5  -1   1   6073.77   5865.05    319.44 o
       433    1   6  -1   1     96.57   -107.35    102.11 <
       434    1   7  -1   1   2075.45   2236.05    256.60 o
       435    1   8  -1   1   1951.77   1497.68    251.36 o
       436    1   9  -1   1    275.89     99.50    238.27 <
       437    1  10  -1   1     31.80     10.47    282.78 <
       438    1 -10   0   1   1503.23   1288.22    314.20 o
       439    1  -9   0   1    424.38    198.99    295.87 <
       440    1  -8   0   1    717.01    764.55    240.89 o
       441    1  -7   0   1    977.29   1065.66    188.52 o
       442    1  -6   0   1   1042.94   1178.25    157.10 o
       443    1  -5   0   1    153.15    264.45    102.11 <
       444    1  -4   0   1   1396.88   1872.10    151.86 o
       445    1  -3   0   1   1268.93   1086.60    112.59 o
       446    1  -2   0   1    768.41   1042.09     96.88 o
       447    1  -1   0   1     34.49     26.18     57.60 <
       448    1   0   0   1     12.46    -15.71     23.56 <
       449    1   1   0   1     95.45     41.89     34.04 <
       450    1   2   0   1    674.43    659.82     86.40 o
       451    1   3   0   1    300.07     89.02     68.08 <
       452    1   4   0   1   1469.27   1555.28    112.59 o
       453    1   5   0   1   1708.44   1544.81    125.68 o
       454    1   6   0   1   1594.83   1636.45    146.63 o
       455    1   7   0   1      4.75    130.92    115.21 <
       456    1   8   0   1     28.54    -39.27    162.34 <
       457    1   9   0   1     32.24     34.04    227.79 <
       458    1  10   0   1    341.69    225.18    277.54 <
       459    3   5   1  16   1861.17   1361.53    400.60 o
       459    2   5  11  -4   1861.17   1361.53    400.60 o
       459    1 -10   1   1   1861.17   1361.53    400.60 o
       460    1  -9   1   1     84.91    214.70    259.21 <
       461    3   4   1  13  22719.30  22431.20    874.52 o
       461    2   4   9  -3  22719.30  22431.20    874.52 o
       461    1  -8   1   1  22719.30  22431.20    874.52 o
       462    1  -7   1   1     32.86     10.47    141.39 <
       463    3   3   1  10  38978.20  38366.30   1340.58 o
       463    2   3   7  -2  38978.20  38366.30   1340.58 o
       463    1  -6   1   1  38978.20  38366.30   1340.58 o
       464    1  -5   1   1     88.12    -78.55     89.02 <
       465    3   2   1   7  83610.20  81466.50   2634.03 o
       465    2   2   5  -1  83610.20  81466.50   2634.03 o
       465    1  -4   1   1  83610.20  81466.50   2634.03 o
       466    1  -3   1   1     10.69    -81.17     83.79 <
       467    3   1   1   4 224677.00 211529.00   6860.01 o
       467    2   1   3   0 224677.00 211529.00   6860.01 o
       467    1  -2   1   1 224677.00 211529.00   6860.01 o
       468    1  -1   1   1      0.14    -23.56     57.60 <
       469    3   0   1   1     54.84     10.47     44.51 <
       469    2   0   1   1     54.84     10.47     44.51 <
       469    1   0   1   1     54.84     10.47     44.51 <
       470    1   1   1   1      2.18     18.33     41.89 <
       471    3  -1   1  -2  29295.70  29728.40    976.64 o
       471    2  -1  -1   2  29295.70  29728.40    976.64 o
       471    1   2   1   1  29295.70  29728.40    976.64 o
       472    1   3   1   1      0.91   -217.32     70.69 <
       473    3  -2   1  -5  36267.20  37457.70   1235.85 o
       473    2  -2  -3   3  36267.20  37457.70   1235.85 o
       473    1   4   1   1  36267.20  37457.70   1235.85 o
       474    1   5   1   1     10.08    -31.42     83.79 <
       475    3  -3   1  -8   4007.31   4273.10    272.31 o
       475    2  -3  -5   4   4007.31   4273.10    272.31 o
       475    1   6   1   1   4007.31   4273.10    272.31 o
       476    1   7   1   1     15.28    201.61    141.39 <
       477    3  -4   1 -11  41365.00  42652.50   1641.69 o
       477    2  -4  -7   5  41365.00  42652.50   1641.69 o
       477    1   8   1   1  41365.00  42652.50   1641.69 o
       478    1   9   1   1      3.67   -149.24    188.52 <
       479    3  -5   1 -14  15489.20  15353.90    989.73 o
       479    2  -5  -9   6  15489.20  15353.90    989.73 o
       479    1  10   1   1  15489.20  15353.90    989.73 o
       480    1  11   1   1     58.02    298.49    395.37 <
       481    1 -10   2   1    560.95    748.84    405.84 <
       482    1  -9   2   1     14.04     73.31    272.31 <
       483    1  -8   2   1    142.59   -332.53    196.37 <
       484    1  -7   2   1    260.75    256.60    154.48 <
       485    1  -6   2   1    499.27    649.34    130.92 o
       486    1  -5   2   1   1157.56   1262.03    125.68 o
       487    1  -4   2   1   2256.64   2241.29    144.01 o
       488    1  -3   2   1      8.70    -78.55     68.08 <
       489    1  -2   2   1    784.78   1057.80     99.50 o
       490    1  -1   2   1    618.38    544.61     78.55 o
       491    1   0   2   1      0.93    -15.71     68.08 <
       492    1   1   2   1    512.72    322.05     65.46 o
       493    1   2   2   1   1169.05   1518.63    109.97 o
       494    1   3   2   1    331.86    290.63     83.79 o
       495    1   4   2   1   1914.57   2105.13    154.48 o
       496    1   5   2   1   1323.25   1081.37    128.30 o
       497    1   6   2   1   5881.30   6579.85    340.38 o
       498    1   7   2   1    256.45    578.65    162.34 o
       499    1   8   2   1    290.70    439.88    175.43 <
       500    1   9   2   1    234.34    523.66    238.27 <
       501    1  10   2   1    281.71     70.69    261.83 <
       502    1  11   2   1     23.31   -104.73    369.18 <
       503    1  -9   3   1    353.22    214.70    272.31 <
       504    1  -8   3   1   1929.88   1550.05    251.36 o
       505    1  -7   3   1    561.41    348.24    219.94 <
       506    1  -6   3   1    410.37    583.89    233.03 <
       507    1  -5   3   1   3035.74   3558.30    253.98 o
       508    1  -4   3   1     91.75     20.95     94.26 <
       509    1  -3   3   1    154.24     68.08     78.55 <
       510    1  -2   3   1   3103.17   2448.13    136.15 o
       511    1  -1   3   1    154.70    128.30     81.17 <
       512    1   0   3   1     11.50    125.68     78.55 <
       513    1   1   3   1    277.66    128.30     86.40 <
       514    1   2   3   1   1601.95   1298.69    123.06 o
       515    1   3   3   1     15.60    -62.84     78.55 <
       516    1   4   3   1     10.06    -10.47     70.69 <
       517    1   5   3   1   1786.60   2267.47    178.05 o
       518    1   6   3   1    151.35    253.98    112.59 <
       519    1   7   3   1     59.75    -70.69    138.77 <
       520    1   8   3   1    733.19    861.43    243.50 o
       521    1   9   3   1    120.82    -68.08    243.50 <
       522    1  10   3   1     57.52     44.51    272.31 <
       523    1  11   3   1   1526.49   1010.67    348.24 <
       524    3   3   2  17   1688.22   1678.35    356.09 o
       524    2   6  12   0   1688.22   1678.35    356.09 o
       524    1  -9   4   1   1688.22   1678.35    356.09 o
       525    1  -8   4   1    204.73    445.11    282.78 <
       526    3   2   2  14  16676.70  16807.00    803.83 o
       526    2   5  10   1  16676.70  16807.00    803.83 o
       526    1  -7   4   1  16676.70  16807.00    803.83 o
       527    1  -6   4   1      1.97     75.93    233.03 <
       528    3   1   2  11  24831.60  25489.40   1173.01 o
       528    2   4   8   2  24831.60  25489.40   1173.01 o
       528    1  -5   4   1  24831.60  25489.40   1173.01 o
       529    1  -4   4   1    317.44    280.16    120.44 <
       530    3   0   2   8  83276.90  78356.00   2338.16 o
       530    2   3   6   3  83276.90  78356.00   2338.16 o
       530    1  -3   4   1  83276.90  78356.00   2338.16 o
       531    1  -2   4   1     22.42     81.17     86.40 <
       532    3  -1   2   5   9165.55   8124.66    295.87 o
       532    2   2   4   4   9165.55   8124.66    295.87 o
       532    1  -1   4   1   9165.55   8124.66    295.87 o
       533    1   0   4   1      7.44   -172.81     78.55 <
       534    3  -2   2   2   6807.59   7849.73    348.24 o
       534    2   1   2   5   6807.59   7849.73    348.24 o
       534    1   1   4   1   6807.59   7849.73    348.24 o
       535    1   2   4   1      0.56    -86.40     89.02 <
       536    3  -3   2  -1 181165.00 188213.00   6820.73 o
       536    2   0   0   6 181165.00 188213.00   6820.73 o
       536    1   3   4   1 181165.00 188213.00   6820.73 o
       537    1   4   4   1    247.96    235.65    104.73 <
       538    3  -4   2  -4  15904.40  15526.70    539.38 o
       538    2  -1  -2   7  15904.40  15526.70    539.38 o
       538    1   5   4   1  15904.40  15526.70    539.38 o
       539    1   6   4   1     65.15    -49.75     99.50 <
       540    3  -5   2  -7  35184.10  34863.00   1610.27 o
       540    2  -2  -4   8  35184.10  34863.00   1610.27 o
       540    1   7   4   1  35184.10  34863.00   1610.27 o
       541    1   8   4   1     44.90      5.24    212.08 <
       542    3  -6   2 -10  37972.70  39374.40   1856.39 o
       542    2  -3  -6   9  37972.70  39374.40   1856.39 o
       542    1   9   4   1  37972.70  39374.40   1856.39 o
       543    1  10   4   1     70.71     96.88    280.16 <
       544    3  -7   2 -13   9188.47   9397.16    955.69 o
       544    2  -4  -8  10   9188.47   9397.16    955.69 o
       544    1  11   4   1   9188.47   9397.16    955.69 o
       545    1  -8   5   1    101.49     28.80    314.20 <
       546    1  -7   5   1     11.18    151.86    298.49 <
       547    1  -6   5   1    324.34    536.76    259.21 <
       548    1  -5   5   1   1805.22   2037.06    285.40 o
       549    1  -4   5   1    477.01    421.55    172.81 <
       550    1  -3   5   1     19.69     -7.85     99.50 <
       551    1  -2   5   1      3.37     -2.62    102.11 <
       552    1  -1   5   1   1480.23   1387.71    141.39 o
       553    1   0   5   1   1449.37   1513.39    151.86 o
       554    1   1   5   1    804.41    801.21    133.54 o
       555    1   2   5   1     21.08    149.24    109.97 <
       556    1   3   5   1     11.65     47.13    104.73 <
       557    1   4   5   1     89.26    133.54    128.30 <
       558    1   5   5   1   2616.95   3330.51    251.36 o
       559    1   6   5   1    639.37    586.51    170.19 o
       560    1   7   5   1    346.50    487.01    306.34 <
       561    1   8   5   1    102.27    261.83    243.50 <
       562    1   9   5   1    293.05    -28.80    324.67 <
       563    1  10   5   1     33.67   -267.07    343.00 <
       564    1  11   5   1    625.73   -138.77    418.93 <
       565    1  -8   6   1    140.38   -133.54    348.24 <
       566    1  -7   6   1   1796.66   1712.38    374.42 o
       567    1  -6   6   1    707.92   1568.38    308.96 o
       568    1  -5   6   1     41.84     10.47    214.70 <
       569    1  -4   6   1    691.18   1102.31    259.21 o
       570    1  -3   6   1    759.16    926.89    146.63 o
       571    1  -2   6   1     77.85     91.64    117.82 <
       572    1  -1   6   1   2082.49   2026.58    191.14 o
       573    1   0   6   1     87.62    230.41    123.06 <
       574    1   1   6   1   1013.13    788.11    149.24 o
       575    1   2   6   1     26.32    -10.47    117.82 <
       576    1   3   6   1   1239.96   1055.18    185.90 o
       577    1   4   6   1    281.21    248.74    159.72 <
       578    1   5   6   1     17.25    -44.51    164.95 <
       579    1   6   6   1   1096.86   1131.12    306.34 o
       580    1   7   6   1    969.98    636.25    426.79 <
       581    1   8   6   1     82.70    311.58    455.59 <
       582    1   9   6   1    473.75   -117.82    395.37 <
       583    1  10   6   1    814.68    277.54    523.66 <
       584    1  11   6   1     27.90    835.24    596.98 <
       585    1  -7   7   1     87.21    172.81    361.33 <
       586    3   0   3  15   9901.29  11706.50    780.26 o
       586    2   6  11   5   9901.29  11706.50    780.26 o
       586    1  -6   7   1   9901.29  11706.50    780.26 o
       587    1  -5   7   1    123.61    484.39    303.73 <
       588    3  -1   3  12  29141.70  29686.60   1605.03 o
       588    2   5   9   6  29141.70  29686.60   1605.03 o
       588    1  -4   7   1  29141.70  29686.60   1605.03 o
       589    1  -3   7   1    389.72    159.72    141.39 <
       590    3  -2   3   9  33171.80  31103.10   1372.00 o
       590    2   4   7   7  33171.80  31103.10   1372.00 o
       590    1  -2   7   1  33171.80  31103.10   1372.00 o
       591    1  -1   7   1     11.20    -73.31    157.10 <
       592    3  -3   3   6  12530.30  11861.00    617.92 o
       592    2   3   5   8  12530.30  11861.00    617.92 o
       592    1   0   7   1  12530.30  11861.00    617.92 o
       593    1   1   7   1     61.92    151.86    149.24 <
       594    3  -4   3   3   9371.60  10379.00    497.48 o
       594    2   2   3   9   9371.60  10379.00    497.48 o
       594    1   2   7   1   9371.60  10379.00    497.48 o
       595    1   3   7   1    165.70    188.52    191.14 <
       596    3  -5   3   0  40767.20  42532.10   2372.20 o
       596    2   1   1  10  40767.20  42532.10   2372.20 o
       596    1   4   7   1  40767.20  42532.10   2372.20 o
       597    1   5   7   1    132.20    256.60    230.41 <
       598    3  -6   3  -3  11479.80  10043.90    806.44 o
       598    2   0  -1  11  11479.80  10043.90    806.44 o
       598    1   6   7   1  11479.80  10043.90    806.44 o
       599    1   7   7   1      1.78     83.79    303.73 <
       600    3  -7   3  -6  30157.70  35373.60   3008.45 o
       600    2  -1  -3  12  30157.70  35373.60   3008.45 o
       600    1   8   7   1  30157.70  35373.60   3008.45 o
       601    1   9   7   1    444.77    107.35    500.10 <
       602    3  -8   3  -9  13913.20  12719.80   1589.32 o
       602    2  -2  -5  13  13913.20  12719.80   1589.32 o
       602    1  10   7   1  13913.20  12719.80   1589.32 o
       603    1  -6   8   1      9.47    343.00    337.76 <
       604    1  -5   8   1    500.11     52.37    306.34 <
       605    1  -4   8   1   1158.20    942.60    327.29 <
       606    1  -3   8   1    117.89    130.92    196.37 <
       607    1  -2   8   1    620.46   1008.05    230.41 o
       608    1  -1   8   1    398.12    230.41    191.14 <
       609    1   0   8   1     83.00    392.75    214.70 <
       610    1   1   8   1   1626.89   1725.48    274.92 o
       611    1   2   8   1    608.68    466.06    235.65 <
       612    1   3   8   1    363.84    447.73    246.12 <
       613    1   4   8   1   1194.62    968.78    329.91 <
       614    1   5   8   1    931.66   1112.79    335.14 o
       615    1   6   8   1    526.19    421.55    303.73 <
       616    1   7   8   1     98.25    167.57    311.58 <
       617    1   8   8   1    291.66    578.65    510.57 <
       618    1   9   8   1      0.94    -39.27    484.39 <
       619    1  10   8   1    340.83    636.25    549.85 <
       620    1  -6   9   1    931.92   1102.31    408.46 <
       621    1  -5   9   1    706.01    510.57    377.04 <
       622    1  -4   9   1    379.75    264.45    350.86 <
       623    1  -3   9   1     10.21    170.19    235.65 <
       624    1  -2   9   1   1268.02    942.60    277.54 o
       625    1  -1   9   1    236.67    316.82    246.12 <
       626    1   0   9   1   1770.47   1830.21    382.27 o
       627    1   1   9   1      2.33     83.79    290.63 <
       628    1   2   9   1   1262.51   1479.35    400.60 o
       629    1   3   9   1      6.44    154.48    269.69 <
       630    1   4   9   1    109.12   -369.18    274.92 <
       631    1   5   9   1     48.38    196.37    311.58 <
       632    1   6   9   1    334.19    -57.60    316.82 <
       633    1   7   9   1    545.64    434.64    356.09 <
       634    1   8   9   1   1680.09   2327.69    735.75 o
       635    1   9   9   1    438.93    -81.17    565.56 <
       636    1  10   9   1    113.30    646.73    730.51 <
       637    1  -4  10   1    246.96    306.34    631.02 <
       638    3  -3   4  13   8569.38   9179.84    748.84 o
       638    2   6  10  10   8569.38   9179.84    748.84 o
       638    1  -3  10   1   8569.38   9179.84    748.84 o
       639    1  -2  10   1     55.82    -23.56    319.44 <
       640    3  -4   4  10    447.98    487.01    361.33 <
       640    2   5   8  11    447.98    487.01    361.33 <
       640    1  -1  10   1    447.98    487.01    361.33 <
       641    1   0  10   1      0.03    -86.40    361.33 <
       642    3  -5   4   7    519.24    596.98    353.47 <
       642    2   4   6  12    519.24    596.98    353.47 <
       642    1   1  10   1    519.24    596.98    353.47 <
       643    1   2  10   1      3.78   -361.33    408.46 <
       644    3  -6   4   4  19231.50  20289.40   1890.43 o
       644    2   3   4  13  19231.50  20289.40   1890.43 o
       644    1   3  10   1  19231.50  20289.40   1890.43 o
       645    1   4  10   1    259.82    589.12    489.63 <
       646    3  -7   4   1  18485.70  17189.30   1207.05 o
       646    2   2   2  14  18485.70  17189.30   1207.05 o
       646    1   5  10   1  18485.70  17189.30   1207.05 o
       647    1   6  10   1     40.08    130.92    345.62 <
       648    3  -8   4  -2  21563.10  19862.60   1400.80 o
       648    2   1   0  15  21563.10  19862.60   1400.80 o
       648    1   7  10   1  21563.10  19862.60   1400.80 o
       649    1   8  10   1    192.49   -314.20    549.85 <
       650    3  -9   4  -5   9580.62   7721.44   1361.53 o
       650    2   0  -2  16   9580.62   7721.44   1361.53 o
       650    1   9  10   1   9580.62   7721.44   1361.53 o
       651    1  -3  11   1     36.61   -395.37    722.66 <
       652    1  -2  11   1     26.08    631.02    421.55 <
       653    1  -1  11   1    469.88    -10.47    369.18 <
       654    1   0  11   1    240.29    225.18    403.22 <
       655    1   1  11   1     96.77    290.63    484.39 <
       656    1   2  11   1    222.36      0.00    471.30 <
       657    1   3  11   1     43.56   -657.20    437.26 <
       658    1   4  11   1    180.24   -133.54    539.38 <
       659    1   5  11   1    729.55    141.39    521.05 <
       660    1   6  11   1    683.59    578.65    424.17 <
       661    1   7  11   1     73.64     28.80    442.50 <
       662    1   8  11   1     24.38   -596.98    602.21 <
       663    1  -2  12   1      9.31    -99.50    452.97 <
       664    1  -1  12   1   1005.98     73.31    596.98 <
       665    1   0  12   1     70.50    699.09    578.65 <
       666    1   1  12   1   1324.28     99.50    531.52 <
       667    1   2  12   1     34.50     -7.85    562.94 <
       668    1   3  12   1    721.16    759.31    691.24 <
       669    1   4  12   1     62.54   -607.45    510.57 <
       670    1   5  12   1    536.51    746.22    678.15 <
       671    1   6  12   1     71.20    251.36    646.73 <
       672    1   7  12   1   1250.31   2435.04    911.18 <
       673    1   1  13   1     16.84    130.92    602.21 <
       674    3  -7   5   8   1375.56   1489.83    699.09 <
       674    2   5   7  16   1375.56   1489.83    699.09 <
       674    1   2  13   1   1375.56   1489.83    699.09 <
       675    1   3  13   1    100.80    272.31    633.63 <
       676    3  -8   5   5   5674.78   5409.46   1173.01 o
       676    2   4   5  17   5674.78   5409.46   1173.01 o
       676    1   4  13   1   5674.78   5409.46   1173.01 o
       677    1   5  13   1     14.46    164.95    727.89 <
       678    1  -6 -12   2    546.34    136.15    680.76 <
       679    1  -5 -12   2    487.73    837.86    775.02 <
       680    1  -4 -12   2   1218.37   1152.06    772.41 <
       681    1  -3 -12   2      6.67    282.78    589.12 <
       682    1  -2 -12   2    612.97    -15.71    515.81 <
       683    1  -1 -12   2    124.11     60.22    523.66 <
       684    1   0 -12   2    325.81    395.37    555.09 <
       685    1   1 -12   2     62.17    107.35    460.83 <
       686    1  -7 -11   2     35.20   -484.39    589.12 <
       687    1  -6 -11   2     39.42   -191.14    633.63 <
       688    1  -5 -11   2    104.23    272.31    570.79 <
       689    1  -4 -11   2    460.10    471.30    549.85 <
       690    1  -3 -11   2    868.65    557.70    596.98 <
       691    1  -2 -11   2   1389.30   1311.78    591.74 <
       692    1  -1 -11   2    439.66    937.36    555.09 <
       693    1   0 -11   2     35.87    285.40    439.88 <
       694    1   1 -11   2    274.51   -133.54    395.37 <
       695    1   2 -11   2    448.94    573.41    392.75 <
       696    1   3 -11   2    489.16    322.05    672.91 <
       697    3  10  -2   4   5370.90   4561.12    979.25 o
       697    2  -2   2 -16   5370.90   4561.12    979.25 o
       697    1  -8 -10   2   5370.90   4561.12    979.25 o
       698    1  -7 -10   2    503.93    628.40    437.26 <
       699    3   9  -2   1  18452.30  18294.20   1324.87 o
       699    2  -3   0 -15  18452.30  18294.20   1324.87 o
       699    1  -6 -10   2  18452.30  18294.20   1324.87 o
       700    1  -5 -10   2     23.41   -557.70    426.79 <
       701    3   8  -2  -2  17309.30  16880.30   1738.57 o
       701    2  -4  -2 -14  17309.30  16880.30   1738.57 o
       701    1  -4 -10   2  17309.30  16880.30   1738.57 o
       702    1  -3 -10   2     10.14     54.98    518.43 <
       703    3   7  -2  -5  14413.20  11717.00   1267.27 o
       703    2  -5  -4 -13  14413.20  11717.00   1267.27 o
       703    1  -2 -10   2  14413.20  11717.00   1267.27 o
       704    1  -1 -10   2      7.59   -308.96    335.14 <
       705    3   6  -2  -8   3605.82   3744.20    536.76 o
       705    2  -6  -6 -12   3605.82   3744.20    536.76 o
       705    1   0 -10   2   3605.82   3744.20    536.76 o
       706    1   1 -10   2     22.74    264.45    345.62 <
       707    3   5  -2 -11    150.35    -31.42    332.53 <
       707    2  -7  -8 -11    150.35    -31.42    332.53 <
       707    1   2 -10   2    150.35    -31.42    332.53 <
       708    1   3 -10   2     27.29    832.63    659.82 <
       709    3   4  -2 -14   1029.65    871.90    405.84 <
       709    2  -8 -10 -10   1029.65    871.90    405.84 <
       709    1   4 -10   2   1029.65    871.90    405.84 <
       710    1  -9  -9   2    454.05    649.34    717.42 <
       711    1  -8  -9   2   1733.33   1309.16    701.71 <
       712    1  -7  -9   2    170.12    251.36    390.13 <
       713    1  -6  -9   2    185.81     18.33    308.96 <
       714    1  -5  -9   2   2085.35   1660.02    424.17 o
       715    1  -4  -9   2    866.34   1447.93    434.64 o
       716    1  -3  -9   2   1375.62   2183.68    636.25 o
       717    1  -2  -9   2     83.65    353.47    348.24 <
       718    1  -1  -9   2    223.52    348.24    308.96 <
       719    1   0  -9   2     40.50    756.70    319.44 <
       720    1   1  -9   2    686.04    670.29    261.83 <
       721    1   2  -9   2     17.17   -136.15    222.56 <
       722    1   3  -9   2   1672.65   4118.62    738.37 o
       723    1   4  -9   2   1130.15   1057.80    361.33 <
       724    1   5  -9   2    488.21    670.29    358.71 <
       725    1  -9  -8   2    876.89    400.60    594.36 <
       726    1  -8  -8   2    119.50    950.45    578.65 <
       727    1  -7  -8   2    894.32    903.32    432.02 <
       728    1  -6  -8   2      5.51    141.39    332.53 <
       729    1  -5  -8   2    990.54   1701.91    416.31 o
       730    1  -4  -8   2    266.60    612.69    327.29 <
       731    1  -3  -8   2    202.00    -41.89    256.60 <
       732    1  -2  -8   2    601.03    657.20    322.05 <
       733    1  -1  -8   2   2174.81   2987.51    460.83 o
       734    1   0  -8   2     39.98    212.08    219.94 <
       735    1   1  -8   2   1944.66   2154.88    298.49 o
       736    1   2  -8   2   1126.63    898.09    227.79 o
       737    1   3  -8   2      0.97    -20.95    267.07 <
       738    1   4  -8   2    262.29    308.96    267.07 <
       739    1   5  -8   2     76.18    390.13    274.92 <
       740    1   6  -8   2     52.59     65.46    288.02 <
       741    1 -10  -7   2     42.34   -133.54    562.94 <
       742    3   9  -1   8   6725.63   5317.82   1039.47 o
       742    2   0   5 -13   6725.63   5317.82   1039.47 o
       742    1  -9  -7   2   6725.63   5317.82   1039.47 o
       743    1  -8  -7   2     30.83   -212.08    439.88 <
       744    3   8  -1   5  43927.60  41741.30   2432.42 o
       744    2  -1   3 -12  43927.60  41741.30   2432.42 o
       744    1  -7  -7   2  43927.60  41741.30   2432.42 o
       745    1  -6  -7   2    303.78    251.36    295.87 <
       746    3   7  -1   2  54198.70  58064.00   3212.68 o
       746    2  -2   1 -11  54198.70  58064.00   3212.68 o
       746    1  -5  -7   2  54198.70  58064.00   3212.68 o
       747    1  -4  -7   2     39.17   -337.76    227.79 <
       748    3   6  -1  -1  39489.90  42678.70   1934.94 o
       748    2  -3  -1 -10  39489.90  42678.70   1934.94 o
       748    1  -3  -7   2  39489.90  42678.70   1934.94 o
       749    1  -2  -7   2     74.71     99.50    164.95 <
       750    3   5  -1  -4  36748.10  36269.00   1416.51 o
       750    2  -4  -3  -9  36748.10  36269.00   1416.51 o
       750    1  -1  -7   2  36748.10  36269.00   1416.51 o
       751    1   0  -7   2     16.34   -159.72    167.57 <
       752    3   4  -1  -7   4119.19   4757.49    369.18 o
       752    2  -5  -5  -8   4119.19   4757.49    369.18 o
       752    1   1  -7   2   4119.19   4757.49    369.18 o
       753    1   2  -7   2      6.59    -26.18    130.92 <
       754    3   3  -1 -10    733.10    400.60    230.41 <
       754    2  -6  -7  -7    733.10    400.60    230.41 <
       754    1   3  -7   2    733.10    400.60    230.41 <
       755    1   4  -7   2      0.87     13.09    209.47 <
       756    3   2  -1 -13  10098.60  10059.60    628.40 o
       756    2  -7  -9  -6  10098.60  10059.60    628.40 o
       756    1   5  -7   2  10098.60  10059.60    628.40 o
       757    1   6  -7   2    652.11    769.79    240.89 o
       758    3   1  -1 -16  12226.80  14042.10   1196.57 o
       758    2  -8 -11  -5  12226.80  14042.10   1196.57 o
       758    1   7  -7   2  12226.80  14042.10   1196.57 o
       759    1 -10  -6   2   1070.52   2529.30    824.77 o
       760    1  -9  -6   2   4860.51   7475.31   1186.10 o
       761    1  -8  -6   2      1.97   -649.34    343.00 <
       762    1  -7  -6   2    176.33    662.44    442.50 <
       763    1  -6  -6   2     93.20    510.57    295.87 <
       764    1  -5  -6   2    269.06    659.82    285.40 <
       765    1  -4  -6   2   1518.91   1670.49    332.53 o
       766    1  -3  -6   2    273.53    384.89    193.76 <
       767    1  -2  -6   2    274.90    233.03    138.77 <
       768    1  -1  -6   2     29.76    198.99    130.92 <
       769    1   0  -6   2    222.38    332.53    136.15 <
       770    1   1  -6   2    112.17     36.66    112.59 <
       771    1   2  -6   2    726.39    764.55    128.30 o
       772    1   3  -6   2    915.67    819.53    191.14 o
       773    1   4  -6   2   2691.51   3314.80    452.97 o
       774    1   5  -6   2    986.50   1081.37    274.92 o
       775    1   8  -6   2     47.87    -15.71    282.78 <
       776    1 -10  -5   2    382.35    463.44    450.35 <
       777    1  -9  -5   2     27.86    544.61    408.46 <
       778    1  -8  -5   2   1509.51   1777.84    439.88 o
       779    1  -7  -5   2     22.61   -277.54    240.89 <
       780    1  -6  -5   2    611.09    586.51    274.92 <
       781    1  -5  -5   2      2.78   -170.19    162.34 <
       782    1  -4  -5   2    446.81    515.81    183.28 <
       783    1  -3  -5   2   2038.74   2322.45    277.54 o
       784    1  -2  -5   2   5208.89   6320.63    379.66 o
       785    1  -1  -5   2     25.94     13.09    104.73 <
       786    1   0  -5   2      1.06    -34.04     99.50 <
       787    1   1  -5   2    191.58    212.08     99.50 <
       788    1   2  -5   2   2932.37   2846.12    196.37 o
       789    1   3  -5   2   1670.26   1594.56    178.05 o
       790    1   4  -5   2    259.23    738.37    340.38 <
       791    1   8  -5   2    148.33   -335.14    319.44 <
       792    1   9  -5   2     18.88   -233.03    298.49 <
       793    3   8   0  12   4148.12   3618.52    636.25 o
       793    2   2   8 -10   4148.12   3618.52    636.25 o
       793    1 -10  -4   2   4148.12   3618.52    636.25 o
       794    1  -9  -4   2    156.17    -94.26    340.38 <
       795    3   7   0   9  20768.50  19878.30   1322.25 o
       795    2   1   6  -9  20768.50  19878.30   1322.25 o
       795    1  -8  -4   2  20768.50  19878.30   1322.25 o
       796    1  -7  -4   2    338.98    311.58    243.50 <
       797    3   6   0   6  79623.10  84351.90   3678.75 o
       797    2   0   4  -8  79623.10  84351.90   3678.75 o
       797    1  -6  -4   2  79623.10  84351.90   3678.75 o
       798    1  -5  -4   2     26.82    151.86    130.92 <
       799    3   5   0   3  44205.00  47860.30   2097.28 o
       799    2  -1   2  -7  44205.00  47860.30   2097.28 o
       799    1  -4  -4   2  44205.00  47860.30   2097.28 o
       800    1  -3  -4   2     57.45    -52.37    112.59 <
       801    3   4   0   0  10597.30   9737.55    439.88 o
       801    2  -2   0  -6  10597.30   9737.55    439.88 o
       801    1  -2  -4   2  10597.30   9737.55    439.88 o
       802    1  -1  -4   2     64.41   -162.34     94.26 <
       803    3   3   0  -3  32098.80  30715.60   1337.96 o
       803    2  -3  -2  -5  32098.80  30715.60   1337.96 o
       803    1   0  -4   2  32098.80  30715.60   1337.96 o
       804    1   1  -4   2    126.68     13.09     75.93 <
       805    3   2   0  -6   9667.08   9198.17    332.53 o
       805    2  -4  -4  -4   9667.08   9198.17    332.53 o
       805    1   2  -4   2   9667.08   9198.17    332.53 o
       806    1   3  -4   2     73.70    557.70    316.82 <
       807    3   1   0  -9  10330.20  10080.50    924.27 o
       807    2  -5  -6  -3  10330.20  10080.50    924.27 o
       807    1   4  -4   2  10330.20  10080.50    924.27 o
       808    1   5  -4   2    238.97    358.71    303.73 <
       809    3   0   0 -12  61615.70  59923.00   5055.98 o
       809    2  -6  -8  -2  61615.70  59923.00   5055.98 o
       809    1   6  -4   2  61615.70  59923.00   5055.98 o
       810    1   7  -4   2    360.02    523.66    445.11 <
       811    3  -1   0 -15  17997.10  17877.90   1366.77 o
       811    2  -7 -10  -1  17997.10  17877.90   1366.77 o
       811    1   8  -4   2  17997.10  17877.90   1366.77 o
       812    1   9  -4   2      0.59    141.39    282.78 <
       813    1 -10  -3   2   2787.26   1893.05    505.34 o
       814    1  -9  -3   2    189.99     41.89    277.54 <
       815    1  -8  -3   2   1913.78   2953.47    387.51 o
       816    1  -7  -3   2    314.87    277.54    225.18 <
       817    1  -6  -3   2     68.52    -47.13    130.92 <
       818    1  -5  -3   2    558.31    505.34    133.54 o
       819    1  -4  -3   2    454.27    615.31    125.68 o
       820    1  -3  -3   2     17.61    -23.56     99.50 <
       821    1  -2  -3   2    340.31    206.85    104.73 <
       822    1  -1  -3   2    348.58    445.11    109.97 o
       823    1   0  -3   2     12.05     81.17     91.64 <
       824    1   1  -3   2    199.60    138.77     62.84 <
       825    1   3  -3   2    155.55    178.05    170.19 <
       826    1   4  -3   2    621.41    717.42    233.03 o
       827    1   5  -3   2   1796.00    798.59    306.34 <
       828    1   6  -3   2     24.14     13.09    322.05 <
       829    1   7  -3   2     30.85   -290.63    345.62 <
       830    1   8  -3   2   1815.00   2013.49    308.96 o
       831    1   9  -3   2    182.69    217.32    267.07 <
       832    1  10  -3   2    905.39    976.64    335.14 <
       833    1 -10  -2   2    612.46    790.73    353.47 <
       834    1  -9  -2   2   1333.05   1348.44    340.38 o
       835    1  -8  -2   2      5.86    314.20    246.12 <
       836    1  -7  -2   2   1482.25   1646.93    251.36 o
       837    1  -6  -2   2    628.83    657.20    170.19 o
       838    1  -5  -2   2     43.19     10.47    109.97 <
       839    1  -4  -2   2      8.83    149.24     99.50 <
       840    1  -3  -2   2   1576.30   2107.75    164.95 o
       841    1  -2  -2   2   1228.90    856.19    107.35 o
       842    1  -1  -2   2   5333.62   5367.56    225.18 o
       843    1   0  -2   2    693.85    432.02     91.64 o
       844    1   1  -2   2   2872.70   2364.35    138.77 o
       845    1   3  -2   2    808.34    869.28    172.81 o
       846    1   4  -2   2     23.35    172.81    167.57 <
       847    1   5  -2   2    124.93    251.36    230.41 <
       848    1   6  -2   2      3.29    109.97    269.69 <
       849    1   7  -2   2    227.07    -13.09    157.10 <
       850    1   8  -2   2    386.37    311.58    204.23 <
       851    1   9  -2   2    717.99    942.60    280.16 o
       852    1  10  -2   2    107.68    282.78    295.87 <
       853    1 -10  -1   2    170.77    672.91    437.26 <
       854    3   6   1  13  11546.30  10562.30    722.66 o
       854    2   3   9  -6  11546.30  10562.30    722.66 o
       854    1  -9  -1   2  11546.30  10562.30    722.66 o
       855    1  -8  -1   2    172.49     49.75    222.56 <
       856    3   5   1  10  49084.70  51015.40   1945.41 o
       856    2   2   7  -5  49084.70  51015.40   1945.41 o
       856    1  -7  -1   2  49084.70  51015.40   1945.41 o
       857    1  -6  -1   2      0.23     65.46    151.86 <
       858    3   4   1   7 114750.00 124931.00   4045.31 o
       858    2   1   5  -4 114750.00 124931.00   4045.31 o
       858    1  -5  -1   2 114750.00 124931.00   4045.31 o
       859    1  -4  -1   2     19.73      7.85     91.64 <
       860    3   3   1   4  95048.50 111305.00   3987.71 o
       860    2   0   3  -3  95048.50 111305.00   3987.71 o
       860    1  -3  -1   2  95048.50 111305.00   3987.71 o
       861    1  -2  -1   2      2.62     41.89     68.08 <
       862    3   2   1   1  29729.40  30176.20    908.56 o
       862    2  -1   1  -2  29729.40  30176.20    908.56 o
       862    1  -1  -1   2  29729.40  30176.20    908.56 o
       863    1   0  -1   2      1.90   -369.18     54.98 <
       864    3   1   1  -2  28498.40  24266.60   1057.80 o
       864    2  -2  -1  -1  28498.40  24266.60   1057.80 o
       864    1   1  -1   2  28498.40  24266.60   1057.80 o
       865    1   2  -1   2      0.82   -183.28    204.23 <
       866    1   4  -1   2     29.91     65.46    146.63 <
       867    3  -1   1  -8  79403.70  77154.10   4249.54 o
       867    2  -4  -5   1  79403.70  77154.10   4249.54 o
       867    1   5  -1   2  79403.70  77154.10   4249.54 o
       868    1   6  -1   2    200.50    167.57    123.06 <
       869    3  -2   1 -11  51374.40  50826.90   1963.74 o
       869    2  -5  -7   2  51374.40  50826.90   1963.74 o
       869    1   7  -1   2  51374.40  50826.90   1963.74 o
       870    1   8  -1   2     22.03      2.62    196.37 <
       871    3  -3   1 -14   6441.83   6666.25    479.15 o
       871    2  -6  -9   3   6441.83   6666.25    479.15 o
       871    1   9  -1   2   6441.83   6666.25    479.15 o
       872    1  10  -1   2     10.21    217.32    290.63 <
       873    1 -10   0   2    675.47    696.47    316.82 <
       874    1  -9   0   2   1430.10   1796.17    384.89 o
       875    1  -8   0   2    244.70    531.52    212.08 <
       876    1  -7   0   2     70.29     28.80    157.10 <
       877    1  -6   0   2      4.88    141.39    146.63 <
       878    1  -5   0   2      9.66     91.64    112.59 <
       879    1  -4   0   2     39.17     34.04     94.26 <
       880    1  -3   0   2    620.57   1021.15    104.73 o
       881    1  -2   0   2   1814.88   1220.14     99.50 o
       882    1  -1   0   2   2114.90   2254.38    128.30 o
       883    1   0   0   2    295.57     94.26     47.13 <
       884    1   1   0   2   1361.43    979.25     60.22 o
       885    1   2   0   2    525.06    259.21     65.46 o
       886    1   3   0   2   2983.08   2479.55    164.95 o
       887    1   4   0   2    309.00     83.79     68.08 <
       888    1   5   0   2     26.68    183.28     75.93 <
       889    1   6   0   2    362.79    133.54     91.64 <
       890    1   7   0   2     51.51    212.08    227.79 <
       891    1   8   0   2    115.11   -206.85    188.52 <
       892    1   9   0   2   2071.69   2861.83    356.09 o
       893    1  10   0   2    867.17   1356.29    311.58 o
       894    1  11   0   2    398.98    583.89    395.37 <
       895    1 -10   1   2    671.18   1230.61    416.31 <
       896    1  -9   1   2    170.61    -28.80    235.65 <
       897    1  -8   1   2   2237.72   2547.63    277.54 o
       898    1  -7   1   2      2.22    -81.17    154.48 <
       899    1  -6   1   2   1316.39   1377.24    191.14 o
       900    1  -5   1   2   2222.47   1683.58    151.86 o
       901    1  -4   1   2    229.46    164.95     96.88 <
       902    1  -3   1   2     43.01    130.92    107.35 <
       903    1  -2   1   2   5791.11   5569.17    285.40 o
       904    1  -1   1   2    629.26    363.95     68.08 o
       905    1   0   1   2    100.31    144.01     57.60 <
       906    1   1   1   2    482.26    233.03     70.69 o
       907    1   2   1   2   3299.25   2874.92    130.92 o
       908    1   3   1   2    505.32    280.16     70.69 o
       909    1   4   1   2     27.92     13.09     73.31 <
       910    1   5   1   2   1143.28    850.96    112.59 o
       911    1   6   1   2     24.01    -75.93     91.64 <
       912    1   7   1   2     70.06    115.21    128.30 <
       913    1   8   1   2   2002.49   2764.95    253.98 o
       914    1   9   1   2      7.95    204.23    180.66 <
       915    1  10   1   2    866.28    500.10    348.24 <
       916    1  11   1   2    701.15    209.47    400.60 <
       917    3   5   2  17   6370.33   7053.76    712.18 o
       917    2   5  12  -3   6370.33   7053.76    712.18 o
       917    1 -10   2   2   6370.33   7053.76    712.18 o
       918    1  -9   2   2     50.78   -162.34    308.96 <
       919    3   4   2  14  16729.80  17184.10    709.57 o
       919    2   4  10  -2  16729.80  17184.10    709.57 o
       919    1  -8   2   2  16729.80  17184.10    709.57 o
       920    1  -7   2   2    162.16    387.51    159.72 <
       921    3   3   2  11  34500.40  36465.40   1078.75 o
       921    2   3   8  -1  34500.40  36465.40   1078.75 o
       921    1  -6   2   2  34500.40  36465.40   1078.75 o
       922    1  -5   2   2    115.99    235.65    115.21 <
       923    3   2   2   8  16228.00  16414.30    544.61 o
       923    2   2   6   0  16228.00  16414.30    544.61 o
       923    1  -4   2   2  16228.00  16414.30    544.61 o
       924    1  -3   2   2     13.99     57.60     83.79 <
       925    3   1   2   5   7303.63   7530.30    298.49 o
       925    2   1   4   1   7303.63   7530.30    298.49 o
       925    1  -2   2   2   7303.63   7530.30    298.49 o
       926    1  -1   2   2     27.99   -117.82     81.17 <
       927    3   0   2   2  72016.70  64180.40   1916.61 o
       927    2   0   2   2  72016.70  64180.40   1916.61 o
       927    1   0   2   2  72016.70  64180.40   1916.61 o
       928    1   1   2   2     33.63   -164.95     75.93 <
       929    3  -1   2  -1   8491.06   8051.35    259.21 o
       929    2  -1   0   3   8491.06   8051.35    259.21 o
       929    1   2   2   2   8491.06   8051.35    259.21 o
       930    1   3   2   2     19.62    -18.33     68.08 <
       931    3  -2   2  -4  39220.30  39031.40   1463.64 o
       931    2  -2  -2   4  39220.30  39031.40   1463.64 o
       931    1   4   2   2  39220.30  39031.40   1463.64 o
       932    1   5   2   2      1.90     -2.62     96.88 <
       933    3  -3   2  -7 210328.00 224765.00   7203.01 o
       933    2  -3  -4   5 210328.00 224765.00   7203.01 o
       933    1   6   2   2 210328.00 224765.00   7203.01 o
       934    1   7   2   2     24.13    -49.75    136.15 <
       935    3  -4   2 -10  30449.90  31582.20   1259.41 o
       935    2  -4  -6   6  30449.90  31582.20   1259.41 o
       935    1   8   2   2  30449.90  31582.20   1259.41 o
       936    1   9   2   2     22.05    149.24    191.14 <
       937    3  -5   2 -13   7368.52   8093.24    607.45 o
       937    2  -5  -8   7   7368.52   8093.24    607.45 o
       937    1  10   2   2   7368.52   8093.24    607.45 o
       938    1  11   2   2     28.05     54.98    429.40 <
       939    1  -9   3   2      6.15     23.56    350.86 <
       940    1  -8   3   2    335.17    293.25    280.16 <
       941    1  -7   3   2    738.51    903.32    248.74 o
       942    1  -6   3   2     28.68    138.77    144.01 <
       943    1  -5   3   2     11.92      2.62    120.44 <
       944    1  -4   3   2    298.02    552.47    117.82 o
       945    1  -3   3   2   1809.53   1453.17    128.30 o
       946    1  -2   3   2   5044.15   4639.67    206.85 o
       947    1  -1   3   2    334.88    243.50    102.11 <
       948    1   0   3   2    143.04    -20.95     91.64 <
       949    1   1   3   2     38.30     57.60     89.02 <
       950    1   2   3   2   2703.96   2720.44    146.63 o
       951    1   3   3   2    910.68   1149.44    120.44 o
       952    1   4   3   2      5.17     68.08     83.79 <
       953    1   5   3   2    263.99    442.50    102.11 o
       954    1   6   3   2      0.62    -81.17    109.97 <
       955    1   7   3   2    272.68    125.68    151.86 <
       956    1   8   3   2    839.39    947.83    201.61 o
       957    1   9   3   2     35.80    -52.37    230.41 <
       958    1  10   3   2    652.59    555.09    282.78 <
       959    1  11   3   2    760.45   1002.82    335.14 <
       960    1  -9   4   2    702.20    510.57    395.37 <
       961    1  -8   4   2     44.40    178.05    282.78 <
       962    1  -7   4   2   1628.38   1599.80    301.11 o
       963    1  -6   4   2    350.23    340.38    235.65 <
       964    1  -5   4   2   1548.11   1555.28    170.19 o
       965    1  -4   4   2   2038.19   2000.40    170.19 o
       966    1  -3   4   2   1240.51   1657.40    154.48 o
       967    1  -2   4   2    138.29    240.89    102.11 <
       968    1  -1   4   2   1060.95   1188.72    144.01 o
       969    1   0   4   2   1640.65   1220.14    123.06 o
       970    1   1   4   2    606.63    803.83    120.44 o
       971    1   2   4   2     65.32    230.41     94.26 <
       972    1   3   4   2   1187.25   1594.56    167.57 o
       973    1   4   4   2    909.89    526.28    115.21 o
       974    1   5   4   2    319.14    358.71    117.82 o
       975    1   6   4   2   1014.54    696.47    123.06 o
       976    1   7   4   2    553.31    683.38    180.66 o
       977    1   8   4   2     70.23   -348.24    180.66 <
       978    1   9   4   2   3790.07   6019.53    534.14 o
       979    1  10   4   2    549.08    877.14    322.05 <
       980    1  11   4   2    917.51   1144.21    455.59 <
       981    1  -8   5   2    104.27    408.46    322.05 <
       982    3   2   3  15  15938.40  17904.10   1081.37 o
       982    2   5  11   2  15938.40  17904.10   1081.37 o
       982    1  -7   5   2  15938.40  17904.10   1081.37 o
       983    1  -6   5   2    580.27     70.69    274.92 <
       984    3   1   3  12  27680.30  28702.10   1241.09 o
       984    2   4   9   3  27680.30  28702.10   1241.09 o
       984    1  -5   5   2  27680.30  28702.10   1241.09 o
       985    1  -4   5   2     22.18     91.64    128.30 <
       986    3   0   3   9    905.02   1275.12    151.86 o
       986    2   3   7   4    905.02   1275.12    151.86 o
       986    1  -3   5   2    905.02   1275.12    151.86 o
       987    1  -2   5   2     78.05    -44.51    107.35 <
       988    3  -1   3   6  16073.60  16267.60    604.83 o
       988    2   2   5   5  16073.60  16267.60    604.83 o
       988    1  -1   5   2  16073.60  16267.60    604.83 o
       989    1   0   5   2     21.02     26.18     96.88 <
       990    3  -2   3   3 100289.00  96247.00   3136.75 o
       990    2   1   3   6 100289.00  96247.00   3136.75 o
       990    1   1   5   2 100289.00  96247.00   3136.75 o
       991    1   2   5   2    120.70     81.17    104.73 <
       992    3  -3   3   0   1974.99   2102.51    188.52 o
       992    2   0   1   7   1974.99   2102.51    188.52 o
       992    1   3   5   2   1974.99   2102.51    188.52 o
       993    1   4   5   2     38.20   -151.86    120.44 <
       994    3  -4   3  -3  62716.50  66149.30   2204.63 o
       994    2  -1  -1   8  62716.50  66149.30   2204.63 o
       994    1   5   5   2  62716.50  66149.30   2204.63 o
       995    1   6   5   2    110.06    311.58    154.48 <
       996    3  -5   3  -6  59437.40  66209.60   3521.65 o
       996    2  -2  -3   9  59437.40  66209.60   3521.65 o
       996    1   7   5   2  59437.40  66209.60   3521.65 o
       997    1   8   5   2     65.46     91.64    206.85 <
       998    3  -6   3  -9   6313.08   5199.99    515.81 o
       998    2  -3  -5  10   6313.08   5199.99    515.81 o
       998    1   9   5   2   6313.08   5199.99    515.81 o
       999    1  10   5   2      6.64     68.08    348.24 <
      1000    3  -7   3 -12   4027.60   4396.17    693.86 o
      1000    2  -4  -7  11   4027.60   4396.17    693.86 o
      1000    1  11   5   2   4027.60   4396.17    693.86 o
      1001    1  -8   6   2    133.93    -28.80    353.47 <
      1002    1  -7   6   2    113.41   -405.84    350.86 <
      1003    1  -6   6   2      5.62    290.63    288.02 <
      1004    1  -5   6   2    690.88    869.28    290.63 <
      1005    1  -4   6   2     75.53    377.04    149.24 <
      1006    1  -3   6   2      0.33    112.59    130.92 <
      1007    1  -2   6   2   1762.85   1610.27    178.05 o
      1008    1  -1   6   2   3743.33   3259.81    280.16 o
      1009    1   0   6   2    270.72    329.91    133.54 <
      1010    1   1   6   2   1682.72   1762.13    191.14 o
      1011    1   2   6   2   1610.53   1377.24    167.57 o
      1012    1   3   6   2    378.72    678.15    175.43 o
      1013    1   4   6   2    257.55    316.82    149.24 <
      1014    1   5   6   2    783.27    994.96    201.61 o
      1015    1   6   6   2     12.49     78.55    167.57 <
      1016    1   7   6   2    203.95    581.27    285.40 <
      1017    1   8   6   2    692.98    657.20    466.06 <
      1018    1   9   6   2   1080.47   1083.99    544.61 <
      1019    1  10   6   2    210.63    919.03    515.81 <
      1020    1  11   6   2    175.37   -225.18    549.85 <
      1021    1  -7   7   2     67.10    539.38    429.40 <
      1022    1  -6   7   2    638.98   1196.57    382.27 o
      1023    1  -5   7   2   1469.64   1492.44    363.95 o
      1024    1  -4   7   2   1610.97   1906.14    264.45 o
      1025    1  -3   7   2   1558.13   1262.03    227.79 o
      1026    1  -2   7   2   1115.91    858.81    217.32 o
      1027    1  -1   7   2   1530.50   1144.21    222.56 o
      1028    1   0   7   2     13.39    264.45    154.48 <
      1029    1   1   7   2   1174.86    837.86    178.05 o
      1030    1   2   7   2    257.73    233.03    146.63 <
      1031    1   3   7   2    470.40    434.64    193.76 <
      1032    1   4   7   2    245.93    416.31    253.98 <
      1033    1   5   7   2   2486.64   1869.48    350.86 o
      1034    1   6   7   2      7.34   -222.56    246.12 <
      1035    1   7   7   2    283.10    578.65    447.73 <
      1036    1   8   7   2   1885.04   3435.24    769.79 o
      1037    1   9   7   2    153.74     81.17    487.01 <
      1038    1  10   7   2   2097.11   3864.65    864.05 o
      1039    1  11   7   2    682.69   1317.02    680.76 <
      1040    3   0   4  16   3452.70   4396.17    547.23 o
      1040    2   6  12   6   3452.70   4396.17    547.23 o
      1040    1  -6   8   2   3452.70   4396.17    547.23 o
      1041    1  -5   8   2    221.88    484.39    311.58 <
      1042    3  -1   4  13   1292.16   1259.41    363.95 o
      1042    2   5  10   7   1292.16   1259.41    363.95 o
      1042    1  -4   8   2   1292.16   1259.41    363.95 o
      1043    1  -3   8   2      2.53   -324.67    201.61 <
      1044    3  -2   4  10   1244.28    725.28    225.18 o
      1044    2   4   8   8   1244.28    725.28    225.18 o
      1044    1  -2   8   2   1244.28    725.28    225.18 o
      1045    1  -1   8   2    123.23    222.56    204.23 <
      1046    3  -3   4   7  17268.50  18668.60    916.41 o
      1046    2   3   6   9  17268.50  18668.60    916.41 o
      1046    1   0   8   2  17268.50  18668.60    916.41 o
      1047    1   1   8   2     87.14     99.50    196.37 <
      1048    3  -4   4   4  21039.50  18995.90   1193.96 o
      1048    2   2   4  10  21039.50  18995.90   1193.96 o
      1048    1   2   8   2  21039.50  18995.90   1193.96 o
      1049    1   3   8   2      0.03   -167.57    191.14 <
      1050    3  -5   4   1  25320.40  24245.70   1474.12 o
      1050    2   1   2  11  25320.40  24245.70   1474.12 o
      1050    1   4   8   2  25320.40  24245.70   1474.12 o
      1051    1   5   8   2     43.28    458.21    303.73 <
      1052    3  -6   4  -2  62307.90  68518.90   3749.44 o
      1052    2   0   0  12  62307.90  68518.90   3749.44 o
      1052    1   6   8   2  62307.90  68518.90   3749.44 o
      1053    1   7   8   2    331.70   -125.68    314.20 <
      1054    3  -7   4  -5  10160.00   9478.33   1322.25 o
      1054    2  -1  -2  13  10160.00   9478.33   1322.25 o
      1054    1   8   8   2  10160.00   9478.33   1322.25 o
      1055    1   9   8   2     53.57     31.42    549.85 <
      1056    3  -8   4  -8   5074.94   2469.08    871.90 <
      1056    2  -2  -4  14   5074.94   2469.08    871.90 <
      1056    1  10   8   2   5074.94   2469.08    871.90 <
      1057    1  -5   9   2     38.55     -7.85    513.19 <
      1058    1  -4   9   2    611.92    693.86    369.18 <
      1059    1  -3   9   2    636.24    691.24    261.83 <
      1060    1  -2   9   2   1138.45   1063.04    295.87 o
      1061    1  -1   9   2    451.35    421.55    303.73 <
      1062    1   0   9   2    160.45    -26.18    264.45 <
      1063    1   1   9   2    289.81    505.34    337.76 <
      1064    1   2   9   2   1042.98   2377.44    439.88 o
      1065    1   3   9   2    782.34    754.08    322.05 <
      1066    1   4   9   2    196.90    612.69    340.38 <
      1067    1   5   9   2      1.05    178.05    324.67 <
      1068    1   6   9   2    295.41    288.02    293.25 <
      1069    1   7   9   2     21.24   -256.60    295.87 <
      1070    1   8   9   2    276.80    251.36    576.03 <
      1071    1   9   9   2    148.46   -146.63    560.32 <
      1072    1  10   9   2    314.15    112.59    562.94 <
      1073    1  -4  10   2   1151.10   2600.00    727.89 o
      1074    1  -3  10   2    623.78    644.11    353.47 <
      1075    1  -2  10   2    528.41    911.18    400.60 <
      1076    1  -1  10   2     71.58   -678.15    316.82 <
      1077    1   0  10   2   1040.74   1510.77    411.08 o
      1078    1   1  10   2     13.53     10.47    327.29 <
      1079    1   2  10   2    810.99   1610.27    631.02 <
      1080    1   3  10   2     50.64    463.44    513.19 <
      1081    1   4  10   2   1469.33   1819.74    442.50 o
      1082    1   5  10   2     92.20    180.66    340.38 <
      1083    1   6  10   2   1463.64   1589.32    442.50 o
      1084    1   7  10   2    388.88    196.37    374.42 <
      1085    1   8  10   2    418.94    261.83    544.61 <
      1086    1   9  10   2   2132.31   1722.86    767.17 <
      1087    3  -3   5  14    114.10    170.19    405.84 <
      1087    2   6  11  11    114.10    170.19    405.84 <
      1087    1  -3  11   2    114.10    170.19    405.84 <
      1088    1  -2  11   2     58.81    492.24    429.40 <
      1089    3  -4   5  11   3343.75   4123.86    594.36 o
      1089    2   5   9  12   3343.75   4123.86    594.36 o
      1089    1  -1  11   2   3343.75   4123.86    594.36 o
      1090    1   0  11   2     43.73    -70.69    366.57 <
      1091    3  -5   5   8  15364.90  15992.70   1599.80 o
      1091    2   4   7  13  15364.90  15992.70   1599.80 o
      1091    1   1  11   2  15364.90  15992.70   1599.80 o
      1092    1   2  11   2     35.65      2.62    536.76 <
      1093    3  -6   5   5   2524.35   2238.67    678.15 o
      1093    2   3   5  14   2524.35   2238.67    678.15 o
      1093    1   3  11   2   2524.35   2238.67    678.15 o
      1094    1   4  11   2     99.68   -518.43    505.34 <
      1095    3  -7   5   2  16318.60  19048.30   1893.05 o
      1095    2   2   3  15  16318.60  19048.30   1893.05 o
      1095    1   5  11   2  16318.60  19048.30   1893.05 o
      1096    1   6  11   2    382.71    523.66    395.37 <
      1097    3  -8   5  -1   7927.97   6202.81    816.92 o
      1097    2   1   1  16   7927.97   6202.81    816.92 o
      1097    1   7  11   2   7927.97   6202.81    816.92 o
      1098    1   8  11   2     65.35   -306.34    714.80 <
      1099    1  -2  12   2    316.77   1099.70    500.10 <
      1100    1  -1  12   2    816.26   1049.95    667.67 <
      1101    1   0  12   2    168.45     44.51    487.01 <
      1102    1   1  12   2    196.26    -65.46    536.76 <
      1103    1   2  12   2    340.18   1188.72    665.05 <
      1104    1   3  12   2     12.61   -929.51    544.61 <
      1105    1   4  12   2    555.37     62.84    599.60 <
      1106    1   5  12   2    352.41    -91.64    565.56 <
      1107    1   6  12   2     60.98    670.29    672.91 <
      1108    1   7  12   2     46.75   -306.34    620.54 <
      1109    1   1  13   2    524.65    497.48    636.25 <
      1110    1   2  13   2     50.74    795.97    662.44 <
      1111    1   3  13   2   1344.08    884.99    704.33 <
      1112    1   4  13   2     90.51     -5.24    667.67 <
      1113    1   5  13   2   1014.39    366.57    775.02 <
      1114    3  10  -2  -2   6591.33   6048.33   1188.72 o
      1114    2  -5  -2 -17   6591.33   6048.33   1188.72 o
      1114    1  -5 -12   3   6591.33   6048.33   1188.72 o
      1115    1  -4 -12   3    266.63    599.60    657.20 <
      1116    3   9  -2  -5   3545.26   3835.84    921.65 o
      1116    2  -6  -4 -16   3545.26   3835.84    921.65 o
      1116    1  -3 -12   3   3545.26   3835.84    921.65 o
      1117    1  -2 -12   3      0.47   -180.66    518.43 <
      1118    3   8  -2  -8    160.30    -60.22    536.76 <
      1118    2  -7  -6 -15    160.30    -60.22    536.76 <
      1118    1  -1 -12   3    160.30    -60.22    536.76 <
      1119    1   0 -12   3      3.56   -149.24    541.99 <
      1120    1  -7 -11   3   1017.55   1159.92    740.99 <
      1121    1  -6 -11   3    689.30    620.54    638.87 <
      1122    1  -5 -11   3    134.73   -379.66    549.85 <
      1123    1  -4 -11   3     35.84   -178.05    447.73 <
      1124    1  -3 -11   3    124.37      0.00    466.06 <
      1125    1  -2 -11   3   1095.63   1248.94    573.41 <
      1126    1  -1 -11   3    243.03   -256.60    471.30 <
      1127    1   0 -11   3   2503.48   3047.73    555.09 o
      1128    1   1 -11   3    416.04    683.38    447.73 <
      1129    1   2 -11   3    567.24    803.83    426.79 <
      1130    1   3 -11   3     20.23    788.11    675.53 <
      1131    1  -8 -10   3     18.75    602.21    665.05 <
      1132    1  -7 -10   3     83.55     57.60    439.88 <
      1133    1  -6 -10   3    426.64    170.19    528.90 <
      1134    1  -5 -10   3    359.06     39.27    531.52 <
      1135    1  -4 -10   3   1263.22    803.83    547.23 <
      1136    1  -3 -10   3    438.31   -264.45    395.37 <
      1137    1  -2 -10   3    783.52   1180.86    502.72 <
      1138    1  -1 -10   3    644.09    201.61    371.80 <
      1139    1   0 -10   3     73.66    686.00    421.55 <
      1140    1   1 -10   3    216.85     20.95    316.82 <
      1141    1   2 -10   3    743.33   1597.18    379.66 o
      1142    1   3 -10   3      3.59    604.83    602.21 <
      1143    1   4 -10   3    579.54    -89.02    382.27 <
      1144    3  10  -1   5  16020.80  17008.60   1822.35 o
      1144    2  -2   3 -15  16020.80  17008.60   1822.35 o
      1144    1  -8  -9   3  16020.80  17008.60   1822.35 o
      1145    1  -7  -9   3     42.60   -298.49    374.42 <
      1146    3   9  -1   2   8602.61   7475.31    835.24 o
      1146    2  -3   1 -14   8602.61   7475.31    835.24 o
      1146    1  -6  -9   3   8602.61   7475.31    835.24 o
      1147    1  -5  -9   3    109.47   -178.05    298.49 <
      1148    3   8  -1  -1  23945.90  20794.70   1942.80 o
      1148    2  -4  -1 -13  23945.90  20794.70   1942.80 o
      1148    1  -4  -9   3  23945.90  20794.70   1942.80 o
      1149    1  -3  -9   3     86.34   -987.11    324.67 <
      1150    3   7  -1  -4   6565.71   6723.86    981.87 o
      1150    2  -5  -3 -12   6565.71   6723.86    981.87 o
      1150    1  -2  -9   3   6565.71   6723.86    981.87 o
      1151    1  -1  -9   3      8.92     36.66    306.34 <
      1152    3   6  -1  -7   1456.34   1222.76    382.27 o
      1152    2  -6  -5 -11   1456.34   1222.76    382.27 o
      1152    1   0  -9   3   1456.34   1222.76    382.27 o
      1153    1   1  -9   3     19.09    264.45    314.20 <
      1154    3   5  -1 -10  13462.60  14573.60    761.93 o
      1154    2  -7  -7 -10  13462.60  14573.60    761.93 o
      1154    1   2  -9   3  13462.60  14573.60    761.93 o
      1155    1   3  -9   3    519.80    523.66    348.24 <
      1156    3   4  -1 -13  11015.10  12541.80    879.76 o
      1156    2  -8  -9  -9  11015.10  12541.80    879.76 o
      1156    1   4  -9   3  11015.10  12541.80    879.76 o
      1157    1   5  -9   3      9.74    319.44    308.96 <
      1158    1  -9  -8   3    299.72    528.90    722.66 <
      1159    1  -8  -8   3    381.13   1008.05    594.36 <
      1160    1  -7  -8   3   1033.84   1063.04    437.26 <
      1161    1  -6  -8   3   1736.30   1605.03    450.35 o
      1162    1  -5  -8   3     92.12   -308.96    303.73 <
      1163    1  -4  -8   3     58.69    251.36    280.16 <
      1164    1  -3  -8   3      9.12   -109.97    277.54 <
      1165    1  -2  -8   3    893.80    929.51    316.82 <
      1166    1  -1  -8   3   1252.38   1762.13    358.71 o
      1167    1   0  -8   3      8.27     81.17    206.85 <
      1168    1   1  -8   3   2026.75   1851.15    267.07 o
      1169    1   2  -8   3    783.55    976.64    230.41 o
      1170    1   3  -8   3    292.17    788.11    293.25 <
      1171    1   4  -8   3     57.04    -41.89    259.21 <
      1172    1   5  -8   3    312.12    316.82    253.98 <
      1173    1   6  -8   3    299.18    604.83    298.49 <
      1174    1  -9  -7   3    302.24   -259.21    518.43 <
      1175    1  -8  -7   3      7.90    335.14    555.09 <
      1176    1  -7  -7   3    141.33    471.30    335.14 <
      1177    1  -6  -7   3    448.54    942.60    384.89 <
      1178    1  -5  -7   3   2796.21   4089.82    555.09 o
      1179    1  -4  -7   3    188.01     96.88    259.21 <
      1180    1  -3  -7   3    215.75     68.08    204.23 <
      1181    1  -2  -7   3    260.51    353.47    196.37 <
      1182    1  -1  -7   3   1482.90   1754.28    274.92 o
      1183    1   0  -7   3   1853.25   1413.89    230.41 o
      1184    1   1  -7   3   2399.07   2421.95    264.45 o
      1185    1   2  -7   3    106.81    102.11    130.92 <
      1186    1   3  -7   3     11.34     73.31    225.18 <
      1187    1   4  -7   3     85.05    180.66    204.23 <
      1188    1   5  -7   3    740.48    523.66    251.36 <
      1189    1   6  -7   3    273.44   1060.42    306.34 o
      1190    1 -10  -6   3    375.30    806.44    628.40 <
      1191    3   9   0   9  39528.90  40796.10   3461.42 o
      1191    2   0   6 -12  39528.90  40796.10   3461.42 o
      1191    1  -9  -6   3  39528.90  40796.10   3461.42 o
      1192    1  -8  -6   3    113.67     65.46    531.52 <
      1193    3   8   0   6  16206.80  14340.60   1489.83 o
      1193    2  -1   4 -11  16206.80  14340.60   1489.83 o
      1193    1  -7  -6   3  16206.80  14340.60   1489.83 o
      1194    1  -6  -6   3    104.34    -94.26    280.16 <
      1195    3   7   0   3   7409.42   8575.01    793.35 o
      1195    2  -2   2 -10   7409.42   8575.01    793.35 o
      1195    1  -5  -6   3   7409.42   8575.01    793.35 o
      1196    1  -4  -6   3    527.64    701.71    295.87 <
      1197    3   6   0   0  22173.70  25146.40   1209.67 o
      1197    2  -3   0  -9  22173.70  25146.40   1209.67 o
      1197    1  -3  -6   3  22173.70  25146.40   1209.67 o
      1198    1  -2  -6   3     13.64   -133.54    130.92 <
      1199    3   5   0  -3   3979.38   4767.97    332.53 o
      1199    2  -4  -2  -8   3979.38   4767.97    332.53 o
      1199    1  -1  -6   3   3979.38   4767.97    332.53 o
      1200    1   0  -6   3      2.01     96.88    128.30 <
      1201    3   4   0  -6  12714.30  12028.60    515.81 o
      1201    2  -5  -4  -7  12714.30  12028.60    515.81 o
      1201    1   1  -6   3  12714.30  12028.60    515.81 o
      1202    1   2  -6   3     41.20     23.56    109.97 <
      1203    3   3   0  -9  33848.50  33886.30   1754.28 o
      1203    2  -6  -6  -6  33848.50  33886.30   1754.28 o
      1203    1   3  -6   3  33848.50  33886.30   1754.28 o
      1204    1   4  -6   3    428.75    219.94    154.48 <
      1205    1   8  -6   3    402.91    816.92    733.13 <
      1206    1 -10  -5   3      1.11     78.55    418.93 <
      1207    1  -9  -5   3      2.19   -667.67    324.67 <
      1208    1  -8  -5   3    372.88    285.40    379.66 <
      1209    1  -7  -5   3   1502.74   2296.27    657.20 o
      1210    1  -6  -5   3     17.06     26.18    295.87 <
      1211    1  -5  -5   3   1137.10   1128.50    319.44 o
      1212    1  -4  -5   3     38.57    -60.22    196.37 <
      1213    1  -3  -5   3    457.88    157.10    180.66 <
      1214    1  -2  -5   3    934.70    785.50    157.10 o
      1215    1  -1  -5   3    959.52   1123.26    162.34 o
      1216    1   0  -5   3    929.02   1044.71    149.24 o
      1217    1   1  -5   3    285.57    555.09    115.21 o
      1218    1   2  -5   3   1442.28    958.31    117.82 o
      1219    1   3  -5   3    132.44    -94.26    130.92 <
      1220    1   4  -5   3     54.62    233.03    377.04 <
      1221    1   7  -5   3    450.68   1531.72    576.03 <
      1222    1   8  -5   3    860.15    204.23    547.23 <
      1223    1   9  -5   3      6.90   1010.67    686.00 <
      1224    1 -10  -4   3    581.25    348.24    445.11 <
      1225    1  -9  -4   3    313.82    615.31    405.84 <
      1226    1  -8  -4   3    489.54    586.51    361.33 <
      1227    1  -7  -4   3     51.64    306.34    298.49 <
      1228    1  -6  -4   3   3482.76   5755.08    426.79 o
      1229    1  -5  -4   3    648.62   1267.27    206.85 o
      1230    1  -4  -4   3   4626.21   6805.02    494.86 o
      1231    1  -3  -4   3    221.32    227.79    130.92 <
      1232    1  -2  -4   3   1469.15   2141.79    217.32 o
      1233    1  -1  -4   3    136.30     81.17    104.73 <
      1234    1   0  -4   3     33.99     73.31     94.26 <
      1235    1   1  -4   3    305.79    170.19     89.02 <
      1236    1   2  -4   3   2218.95   2594.76    144.01 o
      1237    1   3  -4   3     58.97   -196.37    240.89 <
      1238    1   4  -4   3   1445.54   1468.88    358.71 o
      1239    1   5  -4   3    592.38    704.33    562.94 <
      1240    1   6  -4   3    426.79    432.02    539.38 <
      1241    1   7  -4   3      5.42    -62.84    382.27 <
      1242    1   8  -4   3    355.70    -52.37    450.35 <
      1243    1   9  -4   3      3.33   -159.72    476.54 <
      1244    3   8   1  13  21142.50  18498.50   1319.64 o
      1244    2   2   9  -9  21142.50  18498.50   1319.64 o
      1244    1 -10  -3   3  21142.50  18498.50   1319.64 o
      1245    1  -9  -3   3    146.91     60.22    340.38 <
      1246    3   7   1  10  30421.00  31990.70   1544.81 o
      1246    2   1   7  -8  30421.00  31990.70   1544.81 o
      1246    1  -8  -3   3  30421.00  31990.70   1544.81 o
      1247    1  -7  -3   3    128.03    133.54    227.79 <
      1248    3   6   1   7   8136.06   7894.25    505.34 o
      1248    2   0   5  -7   8136.06   7894.25    505.34 o
      1248    1  -6  -3   3   8136.06   7894.25    505.34 o
      1249    1  -5  -3   3     21.92     28.80    125.68 <
      1250    3   5   1   4  29150.00  29951.00   1183.48 o
      1250    2  -1   3  -6  29150.00  29951.00   1183.48 o
      1250    1  -4  -3   3  29150.00  29951.00   1183.48 o
      1251    1  -3  -3   3     51.64    -83.79     91.64 <
      1252    3   4   1   1  35945.30  41654.90   1814.50 o
      1252    2  -2   1  -5  35945.30  41654.90   1814.50 o
      1252    1  -2  -3   3  35945.30  41654.90   1814.50 o
      1253    1  -1  -3   3     71.49     39.27     96.88 <
      1254    3   3   1  -2  92052.90  94992.80   3409.06 o
      1254    2  -3  -1  -4  92052.90  94992.80   3409.06 o
      1254    1   0  -3   3  92052.90  94992.80   3409.06 o
      1255    1   1  -3   3     41.94    -10.47     68.08 <
      1256    3   2   1  -5 141730.00 126352.00   9082.97 o
      1256    2  -4  -3  -3 141730.00 126352.00   9082.97 o
      1256    1   2  -3   3 141730.00 126352.00   9082.97 o
      1257    1   3  -3   3    326.48    193.76    303.73 <
      1258    1   5  -3   3     16.12    298.49    238.27 <
      1259    3   0   1 -11   9443.78   9983.67    845.72 o
      1259    2  -6  -7  -1   9443.78   9983.67    845.72 o
      1259    1   6  -3   3   9443.78   9983.67    845.72 o
      1260    1   7  -3   3      0.01   -316.82    348.24 <
      1261    3  -1   1 -14   9387.48   7093.04    811.68 o
      1261    2  -7  -9   0   9387.48   7093.04    811.68 o
      1261    1   8  -3   3   9387.48   7093.04    811.68 o
      1262    1   9  -3   3    283.22    324.67    264.45 <
      1263    3  -2   1 -17   2194.45   2490.03    377.04 o
      1263    2  -8 -11   1   2194.45   2490.03    377.04 o
      1263    1  10  -3   3   2194.45   2490.03    377.04 o
      1264    1 -10  -2   3     23.05    361.33    384.89 <
      1265    1  -9  -2   3     25.98   -387.51    251.36 <
      1266    1  -8  -2   3    104.36    125.68    243.50 <
      1267    1  -7  -2   3    285.63    500.10    230.41 <
      1268    1  -6  -2   3   2998.82   4026.98    327.29 o
      1269    1  -5  -2   3   1077.06   1102.31    164.95 o
      1270    1  -4  -2   3    316.81    144.01    112.59 <
      1271    1  -3  -2   3      0.14    -62.84     91.64 <
      1272    1  -2  -2   3    447.55    722.66    112.59 o
      1273    1  -1  -2   3    370.39    329.91     83.79 o
      1274    1   0  -2   3      2.74    112.59     75.93 <
      1275    1   1  -2   3     89.39    130.92     62.84 <
      1276    1   2  -2   3     22.75    133.54    277.54 <
      1277    1   3  -2   3    240.87    311.58    329.91 <
      1278    1   4  -2   3     57.97    256.60    146.63 <
      1279    1   5  -2   3     18.39     -7.85    162.34 <
      1280    1   6  -2   3   1490.95   1576.23    353.47 o
      1281    1   7  -2   3   1198.09   1078.75    340.38 o
      1282    1   8  -2   3    437.70    552.47    217.32 <
      1283    1   9  -2   3    207.00    562.94    272.31 <
      1284    1  10  -2   3    293.44    534.14    314.20 <
      1285    1 -10  -1   3      3.09   -167.57    424.17 <
      1286    1  -9  -1   3    376.60     57.60    288.02 <
      1287    1  -8  -1   3   1130.03   1238.47    295.87 o
      1288    1  -7  -1   3   1130.61   1591.94    290.63 o
      1289    1  -6  -1   3      4.19    -49.75    149.24 <
      1290    1  -5  -1   3   7091.92   7404.62    350.86 o
      1291    1  -4  -1   3      3.37     99.50    104.73 <
      1292    1  -3  -1   3   1927.10   2741.39    191.14 o
      1293    1  -2  -1   3    646.07    552.47     89.02 o
      1294    1  -1  -1   3   1633.30   2013.49    112.59 o
      1295    1   0  -1   3    498.57    298.49     86.40 o
      1296    1   1  -1   3   4022.27   3314.80    154.48 o
      1297    1   2  -1   3    853.56    843.10    264.45 o
      1298    1   3  -1   3     61.34   -128.30    146.63 <
      1299    1   4  -1   3    111.30   -151.86    141.39 <
      1300    1   5  -1   3   3774.60   3924.87    565.56 o
      1301    1   6  -1   3    187.49    272.31    219.94 <
      1302    1   7  -1   3    710.16    596.98    175.43 o
      1303    1   8  -1   3    602.89    476.54    274.92 <
      1304    1   9  -1   3    345.61    -62.84    214.70 <
      1305    1  10  -1   3    120.92   -133.54    274.92 <
      1306    1 -10   0   3     15.71     20.95    311.58 <
      1307    3   6   2  14  29212.30  30555.80   1565.76 o
      1307    2   3  10  -5  29212.30  30555.80   1565.76 o
      1307    1  -9   0   3  29212.30  30555.80   1565.76 o
      1308    1  -8   0   3     64.99    -62.84    230.41 <
      1309    3   5   2  11   6118.95   6543.19    442.50 o
      1309    2   2   8  -4   6118.95   6543.19    442.50 o
      1309    1  -7   0   3   6118.95   6543.19    442.50 o
      1310    1  -6   0   3    142.93    -13.09    149.24 <
      1311    3   4   2   8   4607.29   5378.04    306.34 o
      1311    2   1   6  -3   4607.29   5378.04    306.34 o
      1311    1  -5   0   3   4607.29   5378.04    306.34 o
      1312    1  -4   0   3      7.91   -172.81     86.40 <
      1313    3   3   2   5  31671.60  32697.60   1104.93 o
      1313    2   0   4  -2  31671.60  32697.60   1104.93 o
      1313    1  -3   0   3  31671.60  32697.60   1104.93 o
      1314    1  -2   0   3     14.53     34.04     83.79 <
      1315    3   2   2   2   8465.92   8229.39    308.96 o
      1315    2  -1   2  -1   8465.92   8229.39    308.96 o
      1315    1  -1   0   3   8465.92   8229.39    308.96 o
      1316    1   0   0   3      0.52   -230.41     81.17 <
      1317    3   1   2  -1  88108.70  79927.00   2181.06 o
      1317    2  -2   0   0  88108.70  79927.00   2181.06 o
      1317    1   1   0   3  88108.70  79927.00   2181.06 o
      1318    1   2   0   3      0.70   -109.97     57.60 <
      1319    3   0   2  -4 221127.00 204868.00   8535.74 o
      1319    2  -3  -2   1 221127.00 204868.00   8535.74 o
      1319    1   3   0   3 221127.00 204868.00   8535.74 o
      1320    1   4   0   3     26.42     54.98     78.55 <
      1321    3  -1   2  -7  40546.10  39630.90   1657.40 o
      1321    2  -4  -4   2  40546.10  39630.90   1657.40 o
      1321    1   5   0   3  40546.10  39630.90   1657.40 o
      1322    1   6   0   3     47.25    397.98    141.39 <
      1323    3  -2   2 -10   6336.57   5998.58    387.51 o
      1323    2  -5  -6   3   6336.57   5998.58    387.51 o
      1323    1   7   0   3   6336.57   5998.58    387.51 o
      1324    1   8   0   3     84.74    248.74    198.99 <
      1325    3  -3   2 -13  16139.10  15767.50    767.17 o
      1325    2  -6  -8   4  16139.10  15767.50    767.17 o
      1325    1   9   0   3  16139.10  15767.50    767.17 o
      1326    1  10   0   3      6.11   -356.09    243.50 <
      1327    3  -4   2 -16   3618.81   4155.28    568.18 o
      1327    2  -7 -10   5   3618.81   4155.28    568.18 o
      1327    1  11   0   3   3618.81   4155.28    568.18 o
      1328    1 -10   1   3    210.87    696.47    332.53 <
      1329    1  -9   1   3    255.58    246.12    253.98 <
      1330    1  -8   1   3    182.78      7.85    227.79 <
      1331    1  -7   1   3    571.13    898.09    219.94 o
      1332    1  -6   1   3    280.63    251.36    172.81 <
      1333    1  -5   1   3   2802.27   3183.88    193.76 o
      1334    1  -4   1   3   1476.82   1178.25    157.10 o
      1335    1  -3   1   3    471.01    222.56    104.73 <
      1336    1  -2   1   3      0.34    -28.80     86.40 <
      1337    1  -1   1   3    105.32    138.77    104.73 <
      1338    1   0   1   3   1139.56    657.20     94.26 o
      1339    1   1   1   3    905.08    874.52    104.73 o
      1340    1   2   1   3    210.67    123.06     62.84 <
      1341    1   3   1   3     40.11    235.65     70.69 o
      1342    1   4   1   3    430.62    369.18     83.79 o
      1343    1   5   1   3    745.49    382.27     99.50 o
      1344    1   6   1   3      0.71     86.40    104.73 <
      1345    1   7   1   3    277.24    282.78    123.06 <
      1346    1   8   1   3   1282.36    725.28    151.86 o
      1347    1   9   1   3    290.94    102.11    230.41 <
      1348    1  10   1   3    111.41    164.95    267.07 <
      1349    1  11   1   3   2085.40   1395.57    466.06 <
      1350    1  -9   2   3    261.89    303.73    290.63 <
      1351    1  -8   2   3   1300.06   1468.88    267.07 o
      1352    1  -7   2   3   1498.52   1107.55    222.56 o
      1353    1  -6   2   3   2645.24   3055.58    233.03 o
      1354    1  -5   2   3    137.09    178.05    125.68 <
      1355    1  -4   2   3   2909.78   3068.68    193.76 o
      1356    1  -3   2   3   1733.25   1500.30    157.10 o
      1357    1  -2   2   3    115.91    175.43     86.40 <
      1358    1  -1   2   3    520.86    589.12    104.73 o
      1359    1   0   2   3     70.68    149.24     96.88 <
      1360    1   1   2   3    135.92    157.10     81.17 <
      1361    1   2   2   3   2707.79   2597.38    144.01 o
      1362    1   3   2   3   1338.76   1222.76    104.73 o
      1363    1   4   2   3   1381.42   1759.51    159.72 o
      1364    1   5   2   3    417.92     99.50     94.26 <
      1365    1   6   2   3   5467.32   7226.57    371.80 o
      1366    1   7   2   3    589.41    916.41    175.43 o
      1367    1   8   2   3    836.50    832.63    191.14 o
      1368    1   9   2   3    237.21      7.85    191.14 <
      1369    1  10   2   3    520.94    680.76    264.45 <
      1370    1  11   2   3    257.64    864.05    418.93 <
      1371    1  -9   3   3     76.13    -20.95    358.71 <
      1372    3   4   3  15   9424.81   9926.07    541.99 o
      1372    2   4  11  -1   9424.81   9926.07    541.99 o
      1372    1  -8   3   3   9424.81   9926.07    541.99 o
      1373    1  -7   3   3    222.58    523.66    209.47 <
      1374    3   3   3  12    495.33    761.93    188.52 o
      1374    2   3   9   0    495.33    761.93    188.52 o
      1374    1  -6   3   3    495.33    761.93    188.52 o
      1375    1  -5   3   3    181.50    196.37    136.15 <
      1376    3   2   3   9   9650.60  10002.00    379.66 o
      1376    2   2   7   1   9650.60  10002.00    379.66 o
      1376    1  -4   3   3   9650.60  10002.00    379.66 o
      1377    1  -3   3   3    178.44    151.86    102.11 <
      1378    3   1   3   6  98233.40  94518.90   3422.15 o
      1378    2   1   5   2  98233.40  94518.90   3422.15 o
      1378    1  -2   3   3  98233.40  94518.90   3422.15 o
      1379    1  -1   3   3      1.46    -99.50     96.88 <
      1380    3   0   3   3 105863.00 104476.00   3110.57 o
      1380    2   0   3   3 105863.00 104476.00   3110.57 o
      1380    1   0   3   3 105863.00 104476.00   3110.57 o
      1381    1   1   3   3      2.95    -36.66     89.02 <
      1382    3  -1   3   0 150566.00 139279.00   4123.86 o
      1382    2  -1   1   4 150566.00 139279.00   4123.86 o
      1382    1   2   3   3 150566.00 139279.00   4123.86 o
      1383    1   3   3   3      3.21     60.22     86.40 <
      1384    3  -2   3  -3 143604.00 143971.00   4249.54 o
      1384    2  -2  -1   5 143604.00 143971.00   4249.54 o
      1384    1   4   3   3 143604.00 143971.00   4249.54 o
      1385    1   5   3   3     60.01     49.75     91.64 <
      1386    3  -3   3  -6   4054.15   3901.30    264.45 o
      1386    2  -3  -3   6   4054.15   3901.30    264.45 o
      1386    1   6   3   3   4054.15   3901.30    264.45 o
      1387    1   7   3   3      8.10   -102.11    154.48 <
      1388    3  -4   3  -9   5864.49   6132.11    424.17 o
      1388    2  -4  -5   7   5864.49   6132.11    424.17 o
      1388    1   8   3   3   5864.49   6132.11    424.17 o
      1389    1   9   3   3      0.07   -138.77    233.03 <
      1390    3  -5   3 -12   6168.72   7113.99    599.60 o
      1390    2  -5  -7   8   6168.72   7113.99    599.60 o
      1390    1  10   3   3   6168.72   7113.99    599.60 o
      1391    1  11   3   3     28.18    109.97    306.34 <
      1392    1  -9   4   3     61.76   -157.10    369.18 <
      1393    1  -8   4   3     12.19    146.63    248.74 <
      1394    1  -7   4   3     51.99    -78.55    230.41 <
      1395    1  -6   4   3    472.08    450.35    209.47 <
      1396    1  -5   4   3    815.39   1065.66    191.14 o
      1397    1  -4   4   3   1719.53   1492.44    167.57 o
      1398    1  -3   4   3     13.35    146.63    117.82 <
      1399    1  -2   4   3    283.45    159.72    109.97 <
      1400    1  -1   4   3    439.28    319.44    112.59 <
      1401    1   0   4   3      1.62    -62.84    102.11 <
      1402    1   1   4   3    970.99    722.66    125.68 o
      1403    1   2   4   3   3613.08   3762.53    214.70 o
      1404    1   3   4   3      9.07   -125.68     86.40 <
      1405    1   4   4   3   1327.13   1303.93    146.63 o
      1406    1   5   4   3   2247.57   1578.85    183.28 o
      1407    1   6   4   3   1528.02   1563.14    162.34 o
      1408    1   7   4   3    232.06     96.88    164.95 <
      1409    1   8   4   3     80.99    -68.08    188.52 <
      1410    1   9   4   3    163.52     28.80    248.74 <
      1411    1  10   4   3    641.60    704.33    316.82 <
      1412    1  11   4   3    250.41    343.00    322.05 <
      1413    1  -8   5   3    816.63    641.49    473.92 <
      1414    1  -7   5   3   1984.16   2812.08    466.06 o
      1415    1  -6   5   3    630.58    204.23    214.70 <
      1416    1  -5   5   3   1880.24   1466.26    227.79 o
      1417    1  -4   5   3    465.74    651.96    183.28 o
      1418    1  -3   5   3    442.77    102.11    133.54 <
      1419    1  -2   5   3   2831.56   1937.56    175.43 o
      1420    1  -1   5   3    109.46     91.64    115.21 <
      1421    1   0   5   3   1007.17    528.90    125.68 o
      1422    1   1   5   3    542.58    384.89    133.54 <
      1423    1   2   5   3   3587.50   2762.33    212.08 o
      1424    1   3   5   3     85.50    -26.18    107.35 <
      1425    1   4   5   3    424.44    447.73    130.92 o
      1426    1   5   5   3   2988.94   3013.69    227.79 o
      1427    1   6   5   3     61.62     34.04    133.54 <
      1428    1   7   5   3   3311.94   4396.17    479.15 o
      1429    1   8   5   3   1313.58   2419.33    403.22 o
      1430    1   9   5   3    235.49   -164.95    227.79 <
      1431    1  10   5   3     12.41    -99.50    356.09 <
      1432    1  11   5   3    652.02    932.12    429.40 <
      1433    1  -8   6   3    215.96   -442.50    450.35 <
      1434    3   2   4  16    815.79   1209.67    403.22 o
      1434    2   5  12   3    815.79   1209.67    403.22 o
      1434    1  -7   6   3    815.79   1209.67    403.22 o
      1435    1  -6   6   3      7.83      2.62    329.91 <
      1436    3   1   4  13    456.02    264.45    206.85 <
      1436    2   4  10   4    456.02    264.45    206.85 <
      1436    1  -5   6   3    456.02    264.45    206.85 <
      1437    1  -4   6   3    268.30    523.66    201.61 <
      1438    3   0   4  10   7378.78   8402.20    426.79 o
      1438    2   3   8   5   7378.78   8402.20    426.79 o
      1438    1  -3   6   3   7378.78   8402.20    426.79 o
      1439    1  -2   6   3     70.96     31.42    175.43 <
      1440    3  -1   4   7  30689.20  28848.70   1018.53 o
      1440    2   2   6   6  30689.20  28848.70   1018.53 o
      1440    1  -1   6   3  30689.20  28848.70   1018.53 o
      1441    1   0   6   3      5.06   -112.59    123.06 <
      1442    3  -2   4   4  44267.70  41971.70   1432.22 o
      1442    2   1   4   7  44267.70  41971.70   1432.22 o
      1442    1   1   6   3  44267.70  41971.70   1432.22 o
      1443    1   2   6   3     31.95     94.26    120.44 <
      1444    3  -3   4   1  82674.90  87753.10   3259.81 o
      1444    2   0   2   8  82674.90  87753.10   3259.81 o
      1444    1   3   6   3  82674.90  87753.10   3259.81 o
      1445    1   4   6   3    199.87    212.08    151.86 <
      1446    3  -4   4  -2  10534.00  10824.20    528.90 o
      1446    2  -1   0   9  10534.00  10824.20    528.90 o
      1446    1   5   6   3  10534.00  10824.20    528.90 o
      1447    1   6   6   3     14.21    133.54    172.81 <
      1448    3  -5   4  -5   2264.47   1929.70    366.57 o
      1448    2  -2  -2  10   2264.47   1929.70    366.57 o
      1448    1   7   6   3   2264.47   1929.70    366.57 o
      1449    1   8   6   3    156.07    301.11    382.27 <
      1450    3  -6   4  -8  16556.70  17053.10   1665.25 o
      1450    2  -3  -4  11  16556.70  17053.10   1665.25 o
      1450    1   9   6   3  16556.70  17053.10   1665.25 o
      1451    1  10   6   3    269.16   -408.46    432.02 <
      1452    3  -7   4 -11   6809.49   7187.30   1159.92 o
      1452    2  -4  -6  12   6809.49   7187.30   1159.92 o
      1452    1  11   6   3   6809.49   7187.30   1159.92 o
      1453    1  -7   7   3      5.92    785.50    599.60 <
      1454    1  -6   7   3    270.14    337.76    384.89 <
      1455    1  -5   7   3    655.08   1021.15    361.33 <
      1456    1  -4   7   3    476.02    573.41    230.41 <
      1457    1  -3   7   3    162.34     86.40    185.90 <
      1458    1  -2   7   3     72.53     60.22    185.90 <
      1459    1  -1   7   3   1277.10   1311.78    222.56 o
      1460    1   0   7   3   2043.44   1356.29    201.61 o
      1461    1   1   7   3   2255.36   1777.84    225.18 o
      1462    1   2   7   3     65.30    206.85    154.48 <
      1463    1   3   7   3    488.83    390.13    206.85 <
      1464    1   4   7   3    291.74    445.11    248.74 <
      1465    1   5   7   3    885.87   1008.05    290.63 o
      1466    1   6   7   3    641.48    502.72    274.92 <
      1467    1   7   7   3    312.90   -185.90    397.98 <
      1468    1   8   7   3    152.41    822.15    513.19 <
      1469    1   9   7   3    236.43    576.03    555.09 <
      1470    1  10   7   3     40.54    416.31    513.19 <
      1471    1  11   7   3    649.23    667.67    620.54 <
      1472    1  -6   8   3    936.07   1044.71    596.98 <
      1473    1  -5   8   3    303.95    293.25    379.66 <
      1474    1  -4   8   3    427.23    500.10    246.12 <
      1475    1  -3   8   3    815.85    492.24    253.98 <
      1476    1  -2   8   3    267.95    -73.31    222.56 <
      1477    1  -1   8   3   1578.17    953.07    256.60 o
      1478    1   0   8   3    189.84    209.47    217.32 <
      1479    1   1   8   3    953.36    356.09    225.18 <
      1480    1   2   8   3     77.86    102.11    209.47 <
      1481    1   3   8   3   1926.47   1591.94    371.80 o
      1482    1   4   8   3    263.30    264.45    261.83 <
      1483    1   5   8   3    306.15    960.92    316.82 o
      1484    1   6   8   3   3327.49   3762.53    513.19 o
      1485    1   7   8   3   1273.91   1241.09    382.27 o
      1486    1   8   8   3    598.54   1167.77    576.03 <
      1487    1   9   8   3    404.94    583.89    536.76 <
      1488    1  10   8   3    161.97    327.29    534.14 <
      1489    1  -5   9   3     16.98    162.34    578.65 <
      1490    3  -1   5  14   1758.68   2311.98    421.55 o
      1490    2   5  11   8   1758.68   2311.98    421.55 o
      1490    1  -4   9   3   1758.68   2311.98    421.55 o
      1491    1  -3   9   3    419.54    178.05    314.20 <
      1492    3  -2   5  11  17425.70  16212.70   1060.42 o
      1492    2   4   9   9  17425.70  16212.70   1060.42 o
      1492    1  -2   9   3  17425.70  16212.70   1060.42 o
      1493    1  -1   9   3      0.03   -151.86    280.16 <
      1494    3  -3   5   8  14164.50  13138.70    919.03 o
      1494    2   3   7  10  14164.50  13138.70    919.03 o
      1494    1   0   9   3  14164.50  13138.70    919.03 o
      1495    1   1   9   3    182.62   -183.28    269.69 <
      1496    3  -4   5   5  41266.00  42943.10   2408.86 o
      1496    2   2   5  11  41266.00  42943.10   2408.86 o
      1496    1   2   9   3  41266.00  42943.10   2408.86 o
      1497    1   3   9   3      2.22    104.73    274.92 <
      1498    3  -5   5   2  28424.50  30019.10   1806.64 o
      1498    2   1   3  12  28424.50  30019.10   1806.64 o
      1498    1   4   9   3  28424.50  30019.10   1806.64 o
      1499    1   5   9   3    139.44   -259.21    288.02 <
      1500    3  -6   5  -1   1300.19   1377.24    392.75 o
      1500    2   0   1  13   1300.19   1377.24    392.75 o
      1500    1   6   9   3   1300.19   1377.24    392.75 o
      1501    1   7   9   3     26.46   -128.30    285.40 <
      1502    3  -7   5  -4   1940.76   2332.93    746.22 o
      1502    2  -1  -1  14   1940.76   2332.93    746.22 o
      1502    1   8   9   3   1940.76   2332.93    746.22 o
      1503    1   9   9   3    559.10   1049.95    680.76 <
      1504    3  -8   5  -7   7079.05   5320.43   1089.22 o
      1504    2  -2  -3  15   7079.05   5320.43   1089.22 o
      1504    1  10   9   3   7079.05   5320.43   1089.22 o
      1505    1  -4  10   3    711.09   -397.98    578.65 <
      1506    1  -3  10   3     27.98    442.50    382.27 <
      1507    1  -2  10   3    660.95    324.67    356.09 <
      1508    1  -1  10   3    132.48    371.80    371.80 <
      1509    1   0  10   3     38.27   -225.18    306.34 <
      1510    1   1  10   3    652.31    769.79    416.31 <
      1511    1   2  10   3   1901.09   2047.53    583.89 o
      1512    1   3  10   3    134.20   1029.00    560.32 <
      1513    1   4  10   3    347.64    198.99    327.29 <
      1514    1   5  10   3    546.34   -157.10    314.20 <
      1515    1   6  10   3    183.83   -267.07    327.29 <
      1516    1   7  10   3    153.37    489.63    395.37 <
      1517    1   8  10   3     34.19    780.26    612.69 <
      1518    1   9  10   3     87.66     78.55    631.02 <
      1519    1  -3  11   3     59.20    159.72    353.47 <
      1520    1  -2  11   3    914.65    515.81    439.88 <
      1521    1  -1  11   3    453.93    298.49    442.50 <
      1522    1   0  11   3   1675.61   2186.30    641.49 o
      1523    1   1  11   3     74.61    426.79    521.05 <
      1524    1   2  11   3   1703.81   2492.64    743.60 o
      1525    1   3  11   3      0.56    837.86    604.83 <
      1526    1   4  11   3    710.69    746.22    583.89 <
      1527    1   5  11   3    750.22   1068.28    680.76 <
      1528    1   6  11   3    782.61    942.60    455.59 <
      1529    1   7  11   3   1464.74   1379.86    494.86 <
      1530    1   8  11   3   1057.19   2291.03    837.86 <
      1531    1  -2  12   3    134.87   -246.12    515.81 <
      1532    3  -4   6  12   6239.72   5990.73    953.07 o
      1532    2   5  10  13   6239.72   5990.73    953.07 o
      1532    1  -1  12   3   6239.72   5990.73    953.07 o
      1533    1   0  12   3      3.23   -578.65    463.44 <
      1534    3  -5   6   9   1359.28    390.13    573.41 <
      1534    2   4   8  14   1359.28    390.13    573.41 <
      1534    1   1  12   3   1359.28    390.13    573.41 <
      1535    1   2  12   3     96.38   -589.12    492.24 <
      1536    3  -6   6   6   8510.90   7059.00   1138.97 o
      1536    2   3   6  15   8510.90   7059.00   1138.97 o
      1536    1   3  12   3   8510.90   7059.00   1138.97 o
      1537    1   4  12   3    163.65    209.47    594.36 <
      1538    3  -7   6   3    786.64    408.46    631.02 <
      1538    2   2   4  16    786.64    408.46    631.02 <
      1538    1   5  12   3    786.64    408.46    631.02 <
      1539    1   6  12   3     13.20   -164.95    583.89 <
      1540    3  -8   6   0     68.87    570.79    481.77 <
      1540    2   1   2  17     68.87    570.79    481.77 <
      1540    1   7  12   3     68.87    570.79    481.77 <
      1541    1   1  13   3    524.76     18.33    565.56 <
      1542    1   2  13   3    121.32    217.32    670.29 <
      1543    1   3  13   3    176.24    204.23    638.87 <
      1544    1   4  13   3    147.54    955.69    761.93 <
      1545    1   5  13   3    432.99   -316.82    659.82 <
      1546    1   6  13   3    111.83   -191.14    617.92 <
      1547    1  -4 -12   4    458.79    557.70    712.18 <
      1548    1  -3 -12   4    126.64    405.84    651.96 <
      1549    1  -2 -12   4    110.29    138.77    521.05 <
      1550    1  -1 -12   4    194.58   -125.68    607.45 <
      1551    1  -6 -11   4    461.52   1073.51    816.92 <
      1552    3  10  -1  -1   1708.12   1929.70    754.08 <
      1552    2  -5  -1 -16   1708.12   1929.70    754.08 <
      1552    1  -5 -11   4   1708.12   1929.70    754.08 <
      1553    1  -4 -11   4     13.93   -947.83    489.63 <
      1554    3   9  -1  -4    172.99    191.14    565.56 <
      1554    2  -6  -3 -15    172.99    191.14    565.56 <
      1554    1  -3 -11   4    172.99    191.14    565.56 <
      1555    1  -2 -11   4     34.42   1073.51    568.18 <
      1556    3   8  -1  -7  11228.20  13193.70   1565.76 o
      1556    2  -7  -5 -14  11228.20  13193.70   1565.76 o
      1556    1  -1 -11   4  11228.20  13193.70   1565.76 o
      1557    1   0 -11   4     91.05    853.57    497.48 <
      1558    3   7  -1 -10  14465.30  15118.20   1112.79 o
      1558    2  -8  -7 -13  14465.30  15118.20   1112.79 o
      1558    1   1 -11   4  14465.30  15118.20   1112.79 o
      1559    1   2 -11   4     68.21    371.80    612.69 <
      1560    1  -7 -10   4    400.59   -374.42    628.40 <
      1561    1  -6 -10   4    102.52    900.70    610.07 <
      1562    1  -5 -10   4   1191.94   1015.91    631.02 <
      1563    1  -4 -10   4   1490.15   1214.90    651.96 <
      1564    1  -3 -10   4    876.73     49.75    439.88 <
      1565    1  -2 -10   4   1736.46    997.58    555.09 <
      1566    1  -1 -10   4      0.71    154.48    473.92 <
      1567    1   0 -10   4    256.11   1065.66    434.64 <
      1568    1   1 -10   4    122.16    204.23    353.47 <
      1569    1   2 -10   4    584.85   1463.64    405.84 o
      1570    1   3 -10   4    155.06   -128.30    662.44 <
      1571    1   4 -10   4   1005.80   1131.12    442.50 <
      1572    1  -8  -9   4   1367.82   1275.12    785.50 <
      1573    1  -7  -9   4      0.07      0.00    442.50 <
      1574    1  -6  -9   4    379.15    162.34    379.66 <
      1575    1  -5  -9   4     68.81    599.60    565.56 <
      1576    1  -4  -9   4      0.67   -154.48    405.84 <
      1577    1  -3  -9   4    479.76    371.80    476.54 <
      1578    1  -2  -9   4   1203.95   1662.64    581.27 <
      1579    1  -1  -9   4    153.34     20.95    293.25 <
      1580    1   0  -9   4     50.88    442.50    322.05 <
      1581    1   1  -9   4    193.67   -361.33    285.40 <
      1582    1   2  -9   4   1152.13   1233.23    274.92 o
      1583    1   3  -9   4    653.28    610.07    384.89 <
      1584    1   4  -9   4    414.62   -363.95    345.62 <
      1585    1   5  -9   4    208.55     86.40    343.00 <
      1586    1  -9  -8   4    174.12    180.66    625.78 <
      1587    3  10   0   6   9864.33  10161.70   1526.48 o
      1587    2  -2   4 -14   9864.33  10161.70   1526.48 o
      1587    1  -8  -8   4   9864.33  10161.70   1526.48 o
      1588    1  -7  -8   4    563.87    277.54    384.89 <
      1589    3   9   0   3  16725.30  17550.60   1243.70 o
      1589    2  -3   2 -13  16725.30  17550.60   1243.70 o
      1589    1  -6  -8   4  16725.30  17550.60   1243.70 o
      1590    1  -5  -8   4    111.12    267.07    327.29 <
      1591    3   8   0   0   2004.82   1934.94    434.64 o
      1591    2  -4   0 -12   2004.82   1934.94    434.64 o
      1591    1  -4  -8   4   2004.82   1934.94    434.64 o
      1592    1  -3  -8   4     13.48    306.34    390.13 <
      1593    3   7   0  -3   5582.54   7498.88    740.99 o
      1593    2  -5  -2 -11   5582.54   7498.88    740.99 o
      1593    1  -2  -8   4   5582.54   7498.88    740.99 o
      1594    1  -1  -8   4    106.74    319.44    272.31 <
      1595    3   6   0  -6  36656.80  34334.10   1568.38 o
      1595    2  -6  -4 -10  36656.80  34334.10   1568.38 o
      1595    1   0  -8   4  36656.80  34334.10   1568.38 o
      1596    1   1  -8   4    210.39    222.56    212.08 <
      1597    3   5   0  -9  17572.20  16786.10    822.15 o
      1597    2  -7  -6  -9  17572.20  16786.10    822.15 o
      1597    1   2  -8   4  17572.20  16786.10    822.15 o
      1598    1   3  -8   4      0.43    112.59    267.07 <
      1599    3   4   0 -12  11807.00  11724.90    764.55 o
      1599    2  -8  -8  -8  11807.00  11724.90    764.55 o
      1599    1   4  -8   4  11807.00  11724.90    764.55 o
      1600    1   5  -8   4    269.27    230.41    288.02 <
      1601    3   3   0 -15   1716.79   2330.31    565.56 o
      1601    2  -9 -10  -7   1716.79   2330.31    565.56 o
      1601    1   6  -8   4   1716.79   2330.31    565.56 o
      1602    1  -9  -7   4      3.77   -377.04    623.16 <
      1603    1  -8  -7   4    959.21    -34.04    555.09 <
      1604    1  -7  -7   4      0.07   -335.14    356.09 <
      1605    1  -6  -7   4    576.22    238.27    340.38 <
      1606    1  -5  -7   4    797.54   1165.15    363.95 o
      1607    1  -4  -7   4   2963.59   4317.62    557.70 o
      1608    1  -3  -7   4   1106.79   1183.48    327.29 o
      1609    1  -2  -7   4    270.97     91.64    240.89 <
      1610    1  -1  -7   4    426.94    738.37    206.85 o
      1611    1   0  -7   4     60.31   -109.97    180.66 <
      1612    1   1  -7   4    564.08    578.65    201.61 <
      1613    1   2  -7   4      3.26   -264.45    167.57 <
      1614    1   3  -7   4   1108.39   1144.21    256.60 o
      1615    1   4  -7   4    490.57    678.15    225.18 o
      1616    1   5  -7   4    850.77   1173.01    259.21 o
      1617    1   6  -7   4     23.90   -191.14    316.82 <
      1618    1  -9  -6   4   2395.76   3754.68    950.45 o
      1619    1  -8  -6   4    174.77    743.60    599.60 <
      1620    1  -7  -6   4   2390.40   4901.50    968.78 o
      1621    1  -6  -6   4    103.90    -41.89    288.02 <
      1622    1  -5  -6   4     11.70   -144.01    274.92 <
      1623    1  -4  -6   4      2.20   -235.65    219.94 <
      1624    1  -3  -6   4    834.07   1044.71    253.98 o
      1625    1  -2  -6   4    288.58    112.59    159.72 <
      1626    1  -1  -6   4   2035.90   3094.86    274.92 o
      1627    1   0  -6   4     28.82     10.47    157.10 <
      1628    1   1  -6   4   2485.86   2914.19    240.89 o
      1629    1   2  -6   4    604.92    610.07    128.30 o
      1630    1   3  -6   4     14.96    259.21    170.19 <
      1631    1   4  -6   4    167.55    172.81    170.19 <
      1632    1   7  -6   4   1107.59   1267.27    665.05 <
      1633    1   8  -6   4    121.10   -316.82    659.82 <
      1634    1 -10  -5   4     22.94   -502.72    437.26 <
      1635    3   9   1  10   6683.78   5380.66    759.31 o
      1635    2   0   7 -11   6683.78   5380.66    759.31 o
      1635    1  -9  -5   4   6683.78   5380.66    759.31 o
      1636    1  -8  -5   4     28.73    319.44    411.08 <
      1637    3   8   1   7  10223.20  13447.70   1615.51 o
      1637    2  -1   5 -10  10223.20  13447.70   1615.51 o
      1637    1  -7  -5   4  10223.20  13447.70   1615.51 o
      1638    1  -6  -5   4    329.31    329.91    322.05 <
      1639    3   7   1   4  10353.00  11012.70    827.39 o
      1639    2  -2   3  -9  10353.00  11012.70    827.39 o
      1639    1  -5  -5   4  10353.00  11012.70    827.39 o
      1640    1  -4  -5   4    196.43    -96.88    233.03 <
      1641    3   6   1   1   4690.27   4995.76    432.02 o
      1641    2  -3   1  -8   4690.27   4995.76    432.02 o
      1641    1  -3  -5   4   4690.27   4995.76    432.02 o
      1642    1  -2  -5   4     10.44    162.34    144.01 <
      1643    3   5   1  -2 115306.00 120186.00   4338.56 o
      1643    2  -4  -1  -7 115306.00 120186.00   4338.56 o
      1643    1  -1  -5   4 115306.00 120186.00   4338.56 o
      1644    1   0  -5   4     23.40     78.55    123.06 <
      1645    3   4   1  -5  79150.00  76913.30   2783.28 o
      1645    2  -5  -3  -6  79150.00  76913.30   2783.28 o
      1645    1   1  -5   4  79150.00  76913.30   2783.28 o
      1646    1   2  -5   4     33.73     36.66     91.64 <
      1647    3   3   1  -8  36086.60  34732.10   1762.13 o
      1647    2  -6  -5  -5  36086.60  34732.10   1762.13 o
      1647    1   3  -5   4  36086.60  34732.10   1762.13 o
      1648    3   1   1 -14   1622.63   1610.27    591.74 <
      1648    2  -8  -9  -3   1622.63   1610.27    591.74 <
      1648    1   7  -5   4   1622.63   1610.27    591.74 <
      1649    1   8  -5   4      7.87   -146.63    518.43 <
      1650    1 -10  -4   4     51.90    591.74    473.92 <
      1651    1  -9  -4   4   1648.70   1492.44    489.63 o
      1652    1  -8  -4   4    469.92    280.16    374.42 <
      1653    1  -7  -4   4    781.14   -162.34    314.20 <
      1654    1  -6  -4   4     84.69    -13.09    212.08 <
      1655    1  -5  -4   4   1558.43   1426.99    277.54 o
      1656    1  -4  -4   4   1901.46   1997.78    277.54 o
      1657    1  -3  -4   4   3396.37   4833.43    408.46 o
      1658    1  -2  -4   4    113.63    141.39    133.54 <
      1659    1  -1  -4   4     28.13     20.95    112.59 <
      1660    1   0  -4   4     35.12    115.21    107.35 <
      1661    1   1  -4   4    428.40    832.63    123.06 o
      1662    1   2  -4   4     64.01    -20.95     78.55 <
      1663    1   4  -4   4   1135.10    827.39    350.86 <
      1664    1   6  -4   4    143.87    295.87    526.28 <
      1665    1   7  -4   4    451.83     57.60    382.27 <
      1666    1   8  -4   4     77.57   -246.12    432.02 <
      1667    1   9  -4   4   1900.99   2277.94    706.95 o
      1668    1 -10  -3   4   1319.63   1557.90    539.38 <
      1669    1  -9  -3   4     53.27    157.10    369.18 <
      1670    1  -8  -3   4   5384.13   6077.13    691.24 o
      1671    1  -7  -3   4      1.66     -7.85    290.63 <
      1672    1  -6  -3   4    900.74   1044.71    233.03 o
      1673    1  -5  -3   4    754.99   1102.31    209.47 o
      1674    1  -4  -3   4     78.79    151.86    136.15 <
      1675    1  -3  -3   4     78.58     60.22    107.35 <
      1676    1  -2  -3   4   4414.66   5954.07    418.93 o
      1677    1  -1  -3   4     79.66     68.08     86.40 <
      1678    1   0  -3   4     27.69    102.11     91.64 <
      1679    1   1  -3   4    114.66    123.06     83.79 <
      1680    1   2  -3   4   4212.16   3838.46    175.43 o
      1681    1   4  -3   4    691.29   -180.66    311.58 <
      1682    1   5  -3   4     51.59     94.26    240.89 <
      1683    1   6  -3   4    606.19    183.28    277.54 <
      1684    1   7  -3   4    249.79    476.54    322.05 <
      1685    1   8  -3   4   1385.77    864.05    445.11 <
      1686    1   9  -3   4    166.83    476.54    476.54 <
      1687    3   8   2  14   6962.67   6553.67    793.35 o
      1687    2   2  10  -8   6962.67   6553.67    793.35 o
      1687    1 -10  -2   4   6962.67   6553.67    793.35 o
      1688    1  -9  -2   4    306.95    322.05    348.24 <
      1689    3   7   2  11   7585.14   7928.28    641.49 o
      1689    2   1   8  -7   7585.14   7928.28    641.49 o
      1689    1  -8  -2   4   7585.14   7928.28    641.49 o
      1690    1  -7  -2   4     78.60    107.35    217.32 <
      1691    3   6   2   8  45713.00  49808.40   2222.96 o
      1691    2   0   6  -6  45713.00  49808.40   2222.96 o
      1691    1  -6  -2   4  45713.00  49808.40   2222.96 o
      1692    1  -5  -2   4      0.45      5.24    130.92 <
      1693    3   5   2   5   4581.31   5935.74    340.38 o
      1693    2  -1   4  -5   4581.31   5935.74    340.38 o
      1693    1  -4  -2   4   4581.31   5935.74    340.38 o
      1694    1  -3  -2   4    139.84    -47.13    115.21 <
      1695    3   4   2   2  40414.90  40937.50   1369.38 o
      1695    2  -2   2  -4  40414.90  40937.50   1369.38 o
      1695    1  -2  -2   4  40414.90  40937.50   1369.38 o
      1696    1  -1  -2   4     77.67    -52.37     75.93 <
      1697    3   3   2  -1 222524.00 223068.00   7909.96 o
      1697    2  -3   0  -3 222524.00 223068.00   7909.96 o
      1697    1   0  -2   4 222524.00 223068.00   7909.96 o
      1698    1   1  -2   4    155.92    -89.02     73.31 <
      1699    3   2   2  -4  37481.80  30849.10   1112.79 o
      1699    2  -4  -2  -2  37481.80  30849.10   1112.79 o
      1699    1   2  -2   4  37481.80  30849.10   1112.79 o
      1700    1   3  -2   4     67.22    308.96    311.58 <
      1701    3   1   2  -7  14831.70  14348.40   1411.28 o
      1701    2  -5  -4  -1  14831.70  14348.40   1411.28 o
      1701    1   4  -2   4  14831.70  14348.40   1411.28 o
      1702    1   5  -2   4     49.09   -115.21    206.85 <
      1703    3   0   2 -10  11241.20  11028.40    871.90 o
      1703    2  -6  -6   0  11241.20  11028.40    871.90 o
      1703    1   6  -2   4  11241.20  11028.40    871.90 o
      1704    1   7  -2   4     81.53    492.24    301.11 <
      1705    3  -1   2 -13   2909.35   3317.42    560.32 o
      1705    2  -7  -8   1   2909.35   3317.42    560.32 o
      1705    1   8  -2   4   2909.35   3317.42    560.32 o
      1706    1   9  -2   4    163.47    225.18    246.12 <
      1707    3  -2   2 -16   4167.25   4330.71    447.73 o
      1707    2  -8 -10   2   4167.25   4330.71    447.73 o
      1707    1  10  -2   4   4167.25   4330.71    447.73 o
      1708    1 -10  -1   4    133.28    570.79    672.91 <
      1709    1  -9  -1   4     57.25    374.42    361.33 <
      1710    1  -8  -1   4   1787.86   2500.50    374.42 o
      1711    1  -7  -1   4    568.70    345.62    233.03 <
      1712    1  -6  -1   4    199.70     94.26    188.52 <
      1713    1  -5  -1   4    365.95    636.25    151.86 o
      1714    1  -4  -1   4   2153.72   2963.94    222.56 o
      1715    1  -3  -1   4     11.15    -18.33     99.50 <
      1716    1  -2  -1   4   1288.21   1725.48    146.63 o
      1717    1  -1  -1   4     74.94     28.80     73.31 <
      1718    1   0  -1   4    140.99    130.92     91.64 <
      1719    1   1  -1   4    347.65    162.34     78.55 <
      1720    1   2  -1   4      9.52     36.66     60.22 <
      1721    1   3  -1   4      3.93    329.91    167.57 <
      1722    1   4  -1   4     66.95    238.27    175.43 <
      1723    1   5  -1   4   1550.55   1078.75    259.21 o
      1724    1   6  -1   4    827.76    644.11    246.12 <
      1725    1   7  -1   4    133.13    217.32    217.32 <
      1726    1   8  -1   4   2692.36   3055.58    301.11 o
      1727    1   9  -1   4    120.55    303.73    214.70 <
      1728    1  10  -1   4   1326.61   1735.95    332.53 o
      1729    1 -10   0   4    670.47    966.16    387.51 <
      1730    1  -9   0   4   3421.43   3694.46    502.72 o
      1731    1  -8   0   4     21.89    494.86    311.58 <
      1732    1  -7   0   4   2804.45   2503.12    340.38 o
      1733    1  -6   0   4   1519.27   1277.74    217.32 o
      1734    1  -5   0   4    192.74     41.89    125.68 <
      1735    1  -4   0   4    943.06   1065.66    146.63 o
      1736    1  -3   0   4   1082.61   1400.80    146.63 o
      1737    1  -2   0   4      3.15    -26.18     89.02 <
      1738    1  -1   0   4   3580.75   4173.61    235.65 o
      1739    1   0   0   4   1880.82   1591.94    138.77 o
      1740    1   1   0   4   1947.65   1948.03    144.01 o
      1741    1   2   0   4    204.59    107.35     57.60 <
      1742    1   3   0   4   1010.72    691.24     75.93 o
      1743    1   4   0   4     44.59    -13.09     62.84 <
      1744    1   5   0   4     64.65    164.95    107.35 <
      1745    1   6   0   4    220.28    102.11    138.77 <
      1746    1   7   0   4   1214.81   1036.86    196.37 o
      1747    1   8   0   4    581.12    544.61    201.61 <
      1748    1   9   0   4    950.81   1379.86    264.45 o
      1749    1  10   0   4     20.85    332.53    264.45 <
      1750    1  11   0   4     42.92    374.42    337.76 <
      1751    3   6   3  15    278.14    547.23    282.78 <
      1751    2   3  11  -4    278.14    547.23    282.78 <
      1751    1  -9   1   4    278.14    547.23    282.78 <
      1752    1  -8   1   4    191.48    311.58    243.50 <
      1753    3   5   3  12   6700.48   6959.50    560.32 o
      1753    2   2   9  -3   6700.48   6959.50    560.32 o
      1753    1  -7   1   4   6700.48   6959.50    560.32 o
      1754    1  -6   1   4      4.48   -240.89    175.43 <
      1755    3   4   3   9  36932.20  37748.40   1293.45 o
      1755    2   1   7  -2  36932.20  37748.40   1293.45 o
      1755    1  -5   1   4  36932.20  37748.40   1293.45 o
      1756    1  -4   1   4    221.63    109.97    107.35 <
      1757    3   3   3   6   9418.15   8729.49    460.83 o
      1757    2   0   5  -1   9418.15   8729.49    460.83 o
      1757    1  -3   1   4   9418.15   8729.49    460.83 o
      1758    1  -2   1   4     73.50     13.09    102.11 <
      1759    3   2   3   3 151150.00 143670.00   5875.52 o
      1759    2  -1   3   0 151150.00 143670.00   5875.52 o
      1759    1  -1   1   4 151150.00 143670.00   5875.52 o
      1760    1   0   1   4     33.71   -157.10     83.79 <
      1761    3   1   3   0 222398.00 200781.00   7116.60 o
      1761    2  -2   1   1 222398.00 200781.00   7116.60 o
      1761    1   1   1   4 222398.00 200781.00   7116.60 o
      1762    1   2   1   4     12.37     94.26     70.69 <
      1763    3   0   3  -3  89773.30  95068.70   3430.00 o
      1763    2  -3  -1   2  89773.30  95068.70   3430.00 o
      1763    1   3   1   4  89773.30  95068.70   3430.00 o
      1764    1   4   1   4     70.01      2.62     73.31 <
      1765    3  -1   3  -6  27371.60  25685.80    871.90 o
      1765    2  -4  -3   3  27371.60  25685.80    871.90 o
      1765    1   5   1   4  27371.60  25685.80    871.90 o
      1766    1   6   1   4     88.08    180.66    102.11 <
      1767    3  -2   3  -9   9773.47   9475.71    387.51 o
      1767    2  -5  -5   4   9773.47   9475.71    387.51 o
      1767    1   7   1   4   9773.47   9475.71    387.51 o
      1768    1   8   1   4     35.86    -23.56    191.14 <
      1769    3  -3   3 -12   5368.24   6103.31    468.68 o
      1769    2  -6  -7   5   5368.24   6103.31    468.68 o
      1769    1   9   1   4   5368.24   6103.31    468.68 o
      1770    1  10   1   4     41.44   -238.27    253.98 <
      1771    3  -4   3 -15  11163.20  11408.00    890.23 o
      1771    2  -7  -9   6  11163.20  11408.00    890.23 o
      1771    1  11   1   4  11163.20  11408.00    890.23 o
      1772    1  -9   2   4    709.28    709.57    306.34 <
      1773    1  -8   2   4    594.52    426.79    261.83 <
      1774    1  -7   2   4    834.03    864.05    230.41 o
      1775    1  -6   2   4      1.60    -73.31    141.39 <
      1776    1  -5   2   4    465.35    269.69    157.10 <
      1777    1  -4   2   4    139.64    170.19    112.59 <
      1778    1  -3   2   4   1166.54   1070.89    130.92 o
      1779    1  -2   2   4    915.53    790.73    107.35 o
      1780    1  -1   2   4    714.70    871.90    125.68 o
      1781    1   0   2   4     20.49    104.73     83.79 <
      1782    1   1   2   4    199.75     83.79     89.02 <
      1783    1   2   2   4   1867.02    963.54    107.35 o
      1784    1   3   2   4    335.61    178.05     89.02 <
      1785    1   4   2   4     21.86     62.84     86.40 <
      1786    1   5   2   4    104.07    201.61    104.73 <
      1787    1   6   2   4    289.31   -120.44    104.73 <
      1788    1   7   2   4   1817.70   1649.54    212.08 o
      1789    1   8   2   4    617.31    560.32    180.66 o
      1790    1   9   2   4   3727.96   5883.37    416.31 o
      1791    1  10   2   4    373.57    720.04    379.66 <
      1792    1  11   2   4    455.43   -180.66    366.57 <
      1793    1  -9   3   4    222.74     94.26    390.13 <
      1794    1  -8   3   4   3140.14   3484.99    405.84 o
      1795    1  -7   3   4    189.46    392.75    193.76 <
      1796    1  -6   3   4     88.03    264.45    183.28 <
      1797    1  -5   3   4   2904.83   2736.15    240.89 o
      1798    1  -4   3   4    229.71    154.48    123.06 <
      1799    1  -3   3   4    243.83    149.24    115.21 <
      1800    1  -2   3   4   2458.95   2393.15    183.28 o
      1801    1  -1   3   4    687.46    557.70    123.06 o
      1802    1   0   3   4    594.30    193.76    112.59 <
      1803    1   1   3   4   1011.27   1107.55    138.77 o
      1804    1   2   3   4    970.33    756.70    123.06 o
      1805    1   3   3   4     37.46     49.75    107.35 <
      1806    1   4   3   4    161.57    133.54     96.88 <
      1807    1   5   3   4   2373.72   1906.14    170.19 o
      1808    1   6   3   4    391.24    523.66    146.63 o
      1809    1   7   3   4     90.71     81.17    149.24 <
      1810    1   8   3   4   1394.13   1827.59    243.50 o
      1811    1   9   3   4     12.41    162.34    222.56 <
      1812    1  10   3   4    430.41    751.46    298.49 <
      1813    1  11   3   4    392.81    782.88    319.44 <
      1814    3   4   4  16    252.95    343.00    311.58 <
      1814    2   4  12   0    252.95    343.00    311.58 <
      1814    1  -8   4   4    252.95    343.00    311.58 <
      1815    1  -7   4   4    170.61    361.33    233.03 <
      1816    3   3   4  13  19657.10  20946.60    905.94 o
      1816    2   3  10   1  19657.10  20946.60    905.94 o
      1816    1  -6   4   4  19657.10  20946.60    905.94 o
      1817    1  -5   4   4    154.30    421.55    178.05 <
      1818    3   2   4  10  21418.10  21289.60    798.59 o
      1818    2   2   8   2  21418.10  21289.60    798.59 o
      1818    1  -4   4   4  21418.10  21289.60    798.59 o
      1819    1  -3   4   4     68.35   -133.54    128.30 <
      1820    3   1   4   7  44824.50  45226.30   1523.86 o
      1820    2   1   6   3  44824.50  45226.30   1523.86 o
      1820    1  -2   4   4  44824.50  45226.30   1523.86 o
      1821    1  -1   4   4     76.58      5.24    117.82 <
      1822    3   0   4   4  72311.00  67987.40   2060.62 o
      1822    2   0   4   4  72311.00  67987.40   2060.62 o
      1822    1   0   4   4  72311.00  67987.40   2060.62 o
      1823    1   1   4   4      9.09   -162.34     99.50 <
      1824    3  -1   4   1   9080.12   8585.48    332.53 o
      1824    2  -1   2   5   9080.12   8585.48    332.53 o
      1824    1   2   4   4   9080.12   8585.48    332.53 o
      1825    1   3   4   4      0.03    -39.27    102.11 <
      1826    3  -2   4  -2  10340.80  11177.60    408.46 o
      1826    2  -2   0   6  10340.80  11177.60    408.46 o
      1826    1   4   4   4  10340.80  11177.60    408.46 o
      1827    1   5   4   4     72.79      5.24    112.59 <
      1828    3  -3   4  -5  21579.00  21884.00    884.99 o
      1828    2  -3  -2   7  21579.00  21884.00    884.99 o
      1828    1   6   4   4  21579.00  21884.00    884.99 o
      1829    1   7   4   4    160.23    301.11    162.34 <
      1830    3  -4   4  -8   8025.82   9318.61    631.02 o
      1830    2  -4  -4   8   8025.82   9318.61    631.02 o
      1830    1   8   4   4   8025.82   9318.61    631.02 o
      1831    1   9   4   4     64.09   -358.71    222.56 <
      1832    3  -5   4 -11  12418.90  14209.60    869.28 o
      1832    2  -5  -6   9  12418.90  14209.60    869.28 o
      1832    1  10   4   4  12418.90  14209.60    869.28 o
      1833    1  11   4   4      7.62   -230.41    293.25 <
      1834    1  -8   5   4    309.57    185.90    447.73 <
      1835    1  -7   5   4    208.79   1303.93    581.27 <
      1836    1  -6   5   4     29.76   -204.23    235.65 <
      1837    1  -5   5   4    117.79    198.99    219.94 <
      1838    1  -4   5   4    111.35    -68.08    175.43 <
      1839    1  -3   5   4    894.19    735.75    193.76 o
      1840    1  -2   5   4   1164.59   1034.24    175.43 o
      1841    1  -1   5   4    850.70    717.42    146.63 o
      1842    1   0   5   4    212.03     36.66    120.44 <
      1843    1   1   5   4    390.01    246.12    133.54 <
      1844    1   2   5   4   1717.65   1942.80    198.99 o
      1845    1   3   5   4   2809.12   2408.86    206.85 o
      1846    1   4   5   4    106.38    214.70    123.06 <
      1847    1   5   5   4     89.40   -159.72    120.44 <
      1848    1   6   5   4    196.34    246.12    154.48 <
      1849    1   7   5   4    293.16    429.40    235.65 <
      1850    1   8   5   4   1469.26   1673.11    374.42 o
      1851    1   9   5   4     83.84    136.15    282.78 <
      1852    1  10   5   4    679.70   1049.95    353.47 <
      1853    1  11   5   4    308.66   -183.28    531.52 <
      1854    1  -7   6   4    812.57   1437.46    633.63 <
      1855    1  -6   6   4    943.13    827.39    277.54 <
      1856    1  -5   6   4    102.45    170.19    227.79 <
      1857    1  -4   6   4   2802.95   2898.48    306.34 o
      1858    1  -3   6   4    497.05    112.59    198.99 <
      1859    1  -2   6   4    619.74    659.82    204.23 o
      1860    1  -1   6   4    616.46    547.23    172.81 o
      1861    1   0   6   4   1651.37   1280.36    185.90 o
      1862    1   1   6   4     12.15     60.22    130.92 <
      1863    1   2   6   4    488.49    633.63    193.76 o
      1864    1   3   6   4    365.27    429.40    136.15 o
      1865    1   4   6   4   1366.86   1434.84    217.32 o
      1866    1   5   6   4     10.27    196.37    172.81 <
      1867    1   6   6   4    851.14    788.11    198.99 o
      1868    1   7   6   4    253.02    109.97    277.54 <
      1869    1   8   6   4    234.46   -230.41    277.54 <
      1870    1   9   6   4   1554.71   2110.37    612.69 o
      1871    1  10   6   4    564.85   1372.00    612.69 <
      1872    1  11   6   4     78.07   -345.62    515.81 <
      1873    3   2   5  17   1802.17   3178.65    788.11 o
      1873    2   5  13   4   1802.17   3178.65    788.11 o
      1873    1  -7   7   4   1802.17   3178.65    788.11 o
      1874    1  -6   7   4    284.89   -133.54    573.41 <
      1875    3   1   5  14  11656.00  12712.00    693.86 o
      1875    2   4  11   5  11656.00  12712.00    693.86 o
      1875    1  -5   7   4  11656.00  12712.00    693.86 o
      1876    1  -4   7   4    110.25    188.52    235.65 <
      1877    3   0   5  11   5493.96   6886.19    455.59 o
      1877    2   3   9   6   5493.96   6886.19    455.59 o
      1877    1  -3   7   4   5493.96   6886.19    455.59 o
      1878    1  -2   7   4    130.43   -206.85    201.61 <
      1879    3  -1   5   8  45062.50  44741.90   1725.48 o
      1879    2   2   7   7  45062.50  44741.90   1725.48 o
      1879    1  -1   7   4  45062.50  44741.90   1725.48 o
      1880    1   0   7   4    142.75    115.21    154.48 <
      1881    3  -2   5   5  40631.80  37591.30   1476.73 o
      1881    2   1   5   8  40631.80  37591.30   1476.73 o
      1881    1   1   7   4  40631.80  37591.30   1476.73 o
      1882    1   2   7   4     30.89    335.14    172.81 <
      1883    3  -3   5   2    801.36    905.94    240.89 o
      1883    2   0   3   9    801.36    905.94    240.89 o
      1883    1   3   7   4    801.36    905.94    240.89 o
      1884    1   4   7   4     19.77    -31.42    253.98 <
      1885    3  -4   5  -1  10634.60  10960.30    798.59 o
      1885    2  -1   1  10  10634.60  10960.30    798.59 o
      1885    1   5   7   4  10634.60  10960.30    798.59 o
      1886    1   6   7   4    187.54    125.68    256.60 <
      1887    3  -5   5  -4  25506.50  25916.20   2243.90 o
      1887    2  -2  -1  11  25506.50  25916.20   2243.90 o
      1887    1   7   7   4  25506.50  25916.20   2243.90 o
      1888    1   8   7   4    301.71    146.63    439.88 <
      1889    3  -6   5  -7   7370.16   6642.69   1063.04 o
      1889    2  -3  -3  12   7370.16   6642.69   1063.04 o
      1889    1   9   7   4   7370.16   6642.69   1063.04 o
      1890    1  10   7   4      1.11   -974.02    421.55 <
      1891    3  -7   5 -10  11495.00  14262.00   1707.15 o
      1891    2  -4  -5  13  11495.00  14262.00   1707.15 o
      1891    1  11   7   4  11495.00  14262.00   1707.15 o
      1892    1  -6   8   4      0.14   -225.18    599.60 <
      1893    1  -5   8   4     29.82   -552.47    301.11 <
      1894    1  -4   8   4      1.26   -180.66    298.49 <
      1895    1  -3   8   4      4.43     36.66    259.21 <
      1896    1  -2   8   4    639.24   1026.38    246.12 o
      1897    1  -1   8   4   1510.94   1000.20    240.89 o
      1898    1   0   8   4     18.15   -377.04    240.89 <
      1899    1   1   8   4    905.66    780.26    246.12 o
      1900    1   2   8   4    610.23    510.57    256.60 <
      1901    1   3   8   4    186.05    298.49    290.63 <
      1902    1   4   8   4    377.66    523.66    324.67 <
      1903    1   5   8   4    445.17    675.53    345.62 <
      1904    1   6   8   4    113.46    623.16    316.82 <
      1905    1   7   8   4   1406.99   1118.02    502.72 <
      1906    1   8   8   4   1015.27   1814.50    594.36 o
      1907    1   9   8   4    510.13    445.11    610.07 <
      1908    1  10   8   4     34.33    151.86    602.21 <
      1909    1  -5   9   4    754.70    730.51    557.70 <
      1910    1  -4   9   4    538.79    523.66    358.71 <
      1911    1  -3   9   4   1345.72   1235.85    403.22 o
      1912    1  -2   9   4    205.27    303.73    332.53 <
      1913    1  -1   9   4    730.42    843.10    387.51 <
      1914    1   0   9   4    100.44   -188.52    251.36 <
      1915    1   1   9   4   1193.81   1034.24    374.42 <
      1916    1   2   9   4      3.12    463.44    489.63 <
      1917    1   3   9   4   1443.52   1225.38    384.89 o
      1918    1   4   9   4    297.91    277.54    319.44 <
      1919    1   5   9   4   2721.26   2351.25    476.54 o
      1920    1   6   9   4     44.47   -288.02    335.14 <
      1921    1   7   9   4     69.81    298.49    356.09 <
      1922    1   8   9   4    305.28   -329.91    437.26 <
      1923    1   9   9   4     38.84     -7.85    581.27 <
      1924    1  10   9   4    790.39    722.66    628.40 <
      1925    3  -1   6  15   6836.44   7556.48    714.80 o
      1925    2   5  12   9   6836.44   7556.48    714.80 o
      1925    1  -4  10   4   6836.44   7556.48    714.80 o
      1926    1  -3  10   4     14.10   -259.21    337.76 <
      1927    3  -2   6  12   1960.03   1301.31    411.08 o
      1927    2   4  10  10   1960.03   1301.31    411.08 o
      1927    1  -2  10   4   1960.03   1301.31    411.08 o
      1928    1  -1  10   4    199.68    363.95    397.98 <
      1929    3  -3   6   9   7976.16   8745.20    835.24 o
      1929    2   3   8  11   7976.16   8745.20    835.24 o
      1929    1   0  10   4   7976.16   8745.20    835.24 o
      1930    1   1  10   4      2.78   -576.03    476.54 <
      1931    3  -4   6   6   1002.64    761.93    526.28 <
      1931    2   2   6  12   1002.64    761.93    526.28 <
      1931    1   2  10   4   1002.64    761.93    526.28 <
      1932    1   3  10   4      5.35     68.08    471.30 <
      1933    3  -5   6   3    452.99    219.94    332.53 <
      1933    2   1   4  13    452.99    219.94    332.53 <
      1933    1   4  10   4    452.99    219.94    332.53 <
      1934    1   5  10   4      6.47    316.82    369.18 <
      1935    3  -6   6   0   7284.12   6734.33    772.41 o
      1935    2   0   2  14   7284.12   6734.33    772.41 o
      1935    1   6  10   4   7284.12   6734.33    772.41 o
      1936    1   7  10   4    460.96    363.95    424.17 <
      1937    3  -7   6  -3  10639.30   9601.39   1361.53 o
      1937    2  -1   0  15  10639.30   9601.39   1361.53 o
      1937    1   8  10   4  10639.30   9601.39   1361.53 o
      1938    1   9  10   4     70.03   -617.92    534.14 <
      1939    1  -3  11   4    275.11   -219.94    437.26 <
      1940    1  -2  11   4    216.65     52.37    403.22 <
      1941    1  -1  11   4    244.21   1089.22    576.03 <
      1942    1   0  11   4    139.21    146.63    531.52 <
      1943    1   1  11   4    176.71    484.39    534.14 <
      1944    1   2  11   4   1630.85   1243.70    649.34 <
      1945    1   3  11   4    816.72    -94.26    500.10 <
      1946    1   4  11   4    276.93   -298.49    549.85 <
      1947    1   5  11   4     30.98     31.42    405.84 <
      1948    1   6  11   4     27.42    615.31    481.77 <
      1949    1   7  11   4    366.85    -60.22    452.97 <
      1950    1   8  11   4    367.70    754.08    701.71 <
      1951    1   9  11   4    230.76    149.24    665.05 <
      1952    1  -1  12   4     22.09    513.19    659.82 <
      1953    1   0  12   4    574.28   1790.93    683.38 <
      1954    1   1  12   4     47.41    712.18    602.21 <
      1955    1   2  12   4    473.21   -337.76    607.45 <
      1956    1   3  12   4     45.40     31.42    610.07 <
      1957    1   4  12   4   1018.23    298.49    636.25 <
      1958    1   5  12   4     31.98    102.11    610.07 <
      1959    1   6  12   4    822.81    502.72    691.24 <
      1960    1   7  12   4     60.17    219.94    510.57 <
      1961    3  -5   7  10    424.65    356.09    641.49 <
      1961    2   4   9  15    424.65    356.09    641.49 <
      1961    1   1  13   4    424.65    356.09    641.49 <
      1962    1   2  13   4     37.88    560.32    717.42 <
      1963    3  -6   7   7    161.17     83.79    599.60 <
      1963    2   3   7  16    161.17     83.79    599.60 <
      1963    1   3  13   4    161.17     83.79    599.60 <
      1964    1   4  13   4     24.96   -248.74    667.67 <
      1965    3  -7   7   4   2020.50   2277.94    947.83 <
      1965    2   2   5  17   2020.50   2277.94    947.83 <
      1965    1   5  13   4   2020.50   2277.94    947.83 <
      1966    1   6  13   4    128.25    429.40    788.11 <
      1967    1  -5 -11   5    575.60    924.27    730.51 <
      1968    1  -4 -11   5      1.03   -437.26    497.48 <
      1969    1  -3 -11   5     21.93    180.66    604.83 <
      1970    1  -2 -11   5     74.29   -390.13    487.01 <
      1971    1  -1 -11   5    143.45    426.79    539.38 <
      1972    1   0 -11   5    324.14   1618.12    633.63 <
      1973    1   1 -11   5    288.19    253.98    468.68 <
      1974    1   2 -11   5    362.28    570.79    772.41 <
      1975    3  11   0   3   4615.49   3241.49   1002.82 o
      1975    2  -4   2 -16   4615.49   3241.49   1002.82 o
      1975    1  -7 -10   5   4615.49   3241.49   1002.82 o
      1976    1  -6 -10   5    110.52   -172.81    583.89 <
      1977    3  10   0   0   9226.93  10250.70   1521.25 o
      1977    2  -5   0 -15   9226.93  10250.70   1521.25 o
      1977    1  -5 -10   5   9226.93  10250.70   1521.25 o
      1978    1  -4 -10   5    186.13   -497.48    468.68 <
      1979    3   9   0  -3  28504.10  33425.50   2890.63 o
      1979    2  -6  -2 -14  28504.10  33425.50   2890.63 o
      1979    1  -3 -10   5  28504.10  33425.50   2890.63 o
      1980    1  -2 -10   5      2.24   -442.50    455.59 <
      1981    3   8   0  -6  14952.50  18391.10   1751.66 o
      1981    2  -7  -4 -13  14952.50  18391.10   1751.66 o
      1981    1  -1 -10   5  14952.50  18391.10   1751.66 o
      1982    1   0 -10   5      6.32      7.85    384.89 <
      1983    3   7   0  -9   6231.42   8245.10    801.21 o
      1983    2  -8  -6 -12   6231.42   8245.10    801.21 o
      1983    1   1 -10   5   6231.42   8245.10    801.21 o
      1984    1   2 -10   5     21.93   -219.94    343.00 <
      1985    3   6   0 -12   3491.63   2937.76    835.24 o
      1985    2  -9  -8 -11   3491.63   2937.76    835.24 o
      1985    1   3 -10   5   3491.63   2937.76    835.24 o
      1986    1  -8  -9   5    646.70    452.97    725.28 <
      1987    1  -7  -9   5   2597.41   2147.03    602.21 o
      1988    1  -6  -9   5    638.06    578.65    445.11 <
      1989    1  -5  -9   5    786.82    167.57    599.60 <
      1990    1  -4  -9   5    277.19    178.05    599.60 <
      1991    1  -3  -9   5    215.32    123.06    518.43 <
      1992    1  -2  -9   5    782.29    845.72    484.39 <
      1993    1  -1  -9   5    163.17    -60.22    353.47 <
      1994    1   0  -9   5   1397.80    751.46    366.57 <
      1995    1   1  -9   5     93.50    298.49    343.00 <
      1996    1   2  -9   5    271.39     39.27    311.58 <
      1997    1   3  -9   5     95.95     31.42    345.62 <
      1998    1   4  -9   5    316.20     81.17    361.33 <
      1999    1   5  -9   5    308.42   -198.99    337.76 <
      2000    1  -8  -8   5     93.27    426.79    738.37 <
      2001    1  -7  -8   5     27.46    -10.47    411.08 <
      2002    1  -6  -8   5    794.77   1165.15    489.63 <
      2003    1  -5  -8   5    110.11   -324.67    345.62 <
      2004    1  -4  -8   5   1144.36   2880.16    727.89 o
      2005    1  -3  -8   5     46.42    130.92    426.79 <
      2006    1  -2  -8   5    680.08   1000.20    463.44 <
      2007    1  -1  -8   5    589.65   1015.91    371.80 <
      2008    1   0  -8   5     72.62     94.26    261.83 <
      2009    1   1  -8   5    389.31    246.12    233.03 <
      2010    1   2  -8   5    290.34    397.98    222.56 <
      2011    1   3  -8   5    203.31   -219.94    267.07 <
      2012    1   4  -8   5   1364.12   1686.20    353.47 o
      2013    1   5  -8   5    286.81   -162.34    269.69 <
      2014    1   6  -8   5      3.42   -366.57    293.25 <
      2015    1  -9  -7   5    363.46    759.31    751.46 <
      2016    3  10   1   7   2752.82   1670.49    853.57 <
      2016    2  -2   5 -13   2752.82   1670.49    853.57 <
      2016    1  -8  -7   5   2752.82   1670.49    853.57 <
      2017    1  -7  -7   5     29.32   -120.44    379.66 <
      2018    3   9   1   4   7117.92   6752.66    806.44 o
      2018    2  -3   3 -12   7117.92   6752.66    806.44 o
      2018    1  -6  -7   5   7117.92   6752.66    806.44 o
      2019    1  -5  -7   5      1.58   -288.02    306.34 <
      2020    3   8   1   1  43444.10  45692.40   2613.09 o
      2020    2  -4   1 -11  43444.10  45692.40   2613.09 o
      2020    1  -4  -7   5  43444.10  45692.40   2613.09 o
      2021    1  -3  -7   5    136.83    306.34    288.02 <
      2022    3   7   1  -2  47064.00  52159.60   2840.88 o
      2022    2  -5  -1 -10  47064.00  52159.60   2840.88 o
      2022    1  -2  -7   5  47064.00  52159.60   2840.88 o
      2023    1  -1  -7   5     55.32   -277.54    256.60 <
      2024    3   6   1  -5   6997.90   8132.51    565.56 o
      2024    2  -6  -3  -9   6997.90   8132.51    565.56 o
      2024    1   0  -7   5   6997.90   8132.51    565.56 o
      2025    1   1  -7   5      7.81    141.39    188.52 <
      2026    3   5   1  -8  24814.60  22928.70   1057.80 o
      2026    2  -7  -5  -8  24814.60  22928.70   1057.80 o
      2026    1   2  -7   5  24814.60  22928.70   1057.80 o
      2027    1   3  -7   5    299.18     68.08    240.89 <
      2028    3   4   1 -11   4743.27   4812.48    460.83 o
      2028    2  -8  -7  -7   4743.27   4812.48    460.83 o
      2028    1   4  -7   5   4743.27   4812.48    460.83 o
      2029    1   5  -7   5      3.57     81.17    233.03 <
      2030    3   3   1 -14   1225.01   1526.48    269.69 o
      2030    2  -9  -9  -6   1225.01   1526.48    269.69 o
      2030    1   6  -7   5   1225.01   1526.48    269.69 o
      2031    1   7  -7   5      0.07   -138.77    696.47 <
      2032    1  -9  -6   5    126.73   -487.01    576.03 <
      2033    1  -8  -6   5   2262.37   2545.01    861.43 <
      2034    1  -7  -6   5   1195.02   1777.84    704.33 <
      2035    1  -6  -6   5   3480.41   4150.04    636.25 o
      2036    1  -5  -6   5     93.94     57.60    314.20 <
      2037    1  -4  -6   5    401.03    403.22    311.58 <
      2038    1  -3  -6   5     17.24    144.01    269.69 <
      2039    1  -2  -6   5    391.08     89.02    193.76 <
      2040    1  -1  -6   5    984.59    641.49    214.70 <
      2041    1   0  -6   5      6.60    -10.47    178.05 <
      2042    1   1  -6   5   1080.98    926.89    196.37 o
      2043    1   2  -6   5     60.37   -151.86    123.06 <
      2044    1   3  -6   5      0.63    -41.89    185.90 <
      2045    1   4  -6   5     42.52    -47.13    172.81 <
      2046    1   5  -6   5    177.23    319.44    235.65 <
      2047    1   7  -6   5   1322.48   2202.01    751.46 <
      2048    1   8  -6   5   1139.09     91.64    604.83 <
      2049    1  -9  -5   5   1475.31    963.54    492.24 <
      2050    1  -8  -5   5    281.67   1267.27    638.87 <
      2051    1  -7  -5   5     47.14   -651.96    471.30 <
      2052    1  -6  -5   5      3.37    248.74    358.71 <
      2053    1  -5  -5   5   3234.47   6378.24    706.95 o
      2054    1  -4  -5   5     90.10    282.78    274.92 <
      2055    1  -3  -5   5    142.82    -20.95    198.99 <
      2056    1  -2  -5   5     17.72    162.34    144.01 <
      2057    1  -1  -5   5    790.21    843.10    178.05 o
      2058    1   0  -5   5   1412.95   1610.27    191.14 o
      2059    1   1  -5   5   2046.26   2503.12    209.47 o
      2060    1   2  -5   5     38.57    212.08    133.54 <
      2061    1   3  -5   5    254.61    144.01    154.48 <
      2062    1   4  -5   5    226.13     99.50    112.59 <
      2063    1   7  -5   5    259.89     -7.85    421.55 <
      2064    1   8  -5   5     17.88   -214.70    479.15 <
      2065    1 -10  -4   5      9.74    644.11    463.44 <
      2066    3   9   2  11   5054.33   5419.93    761.93 o
      2066    2   0   8 -10   5054.33   5419.93    761.93 o
      2066    1  -9  -4   5   5054.33   5419.93    761.93 o
      2067    1  -8  -4   5      1.98   -214.70    356.09 <
      2068    3   8   2   8  11137.80  13295.80   1089.22 o
      2068    2  -1   6  -9  11137.80  13295.80   1089.22 o
      2068    1  -7  -4   5  11137.80  13295.80   1089.22 o
      2069    1  -6  -4   5    481.81    434.64    246.12 <
      2070    3   7   2   5  40168.80  40212.20   1859.01 o
      2070    2  -2   4  -8  40168.80  40212.20   1859.01 o
      2070    1  -5  -4   5  40168.80  40212.20   1859.01 o
      2071    1  -4  -4   5    241.09    138.77    269.69 <
      2072    3   6   2   2 213006.00 248081.00  10308.30 o
      2072    2  -3   2  -7 213006.00 248081.00  10308.30 o
      2072    1  -3  -4   5 213006.00 248081.00  10308.30 o
      2073    1  -2  -4   5      2.02    -62.84    133.54 <
      2074    3   5   2  -1  31787.00  32619.10   1463.64 o
      2074    2  -4   0  -6  31787.00  32619.10   1463.64 o
      2074    1  -1  -4   5  31787.00  32619.10   1463.64 o
      2075    1   0  -4   5     10.88     44.51    107.35 <
      2076    3   4   2  -4   4137.18   4144.81    256.60 o
      2076    2  -5  -2  -5   4137.18   4144.81    256.60 o
      2076    1   1  -4   5   4137.18   4144.81    256.60 o
      2077    1   2  -4   5      0.93     20.95     91.64 <
      2078    3   3   2  -7  21396.70  19095.40    992.34 o
      2078    2  -6  -4  -4  21396.70  19095.40    992.34 o
      2078    1   3  -4   5  21396.70  19095.40    992.34 o
      2079    1   6  -4   5    197.46    -18.33    356.09 <
      2080    3   1   2 -13   8513.75   8983.47    903.32 o
      2080    2  -8  -8  -2   8513.75   8983.47    903.32 o
      2080    1   7  -4   5   8513.75   8983.47    903.32 o
      2081    1   8  -4   5    220.95    835.24    452.97 <
      2082    3   0   2 -16   8111.28   6805.02    913.79 o
      2082    2  -9 -10  -1   8111.28   6805.02    913.79 o
      2082    1   9  -4   5   8111.28   6805.02    913.79 o
      2083    1 -10  -3   5    115.92    806.44    466.06 <
      2084    1  -9  -3   5    939.23    976.64    424.17 <
      2085    1  -8  -3   5    791.03   1097.08    408.46 <
      2086    1  -7  -3   5   1728.16   1170.39    363.95 o
      2087    1  -6  -3   5    132.77    144.01    217.32 <
      2088    1  -5  -3   5   1783.48   2576.43    285.40 o
      2089    1  -4  -3   5     52.66     52.37    154.48 <
      2090    1  -3  -3   5     21.53     15.71    146.63 <
      2091    1  -2  -3   5     16.89    -57.60    146.63 <
      2092    1  -1  -3   5    552.07    701.71    120.44 o
      2093    1   0  -3   5     58.07    151.86    102.11 <
      2094    1   1  -3   5     25.08     -7.85     86.40 <
      2095    1   2  -3   5    520.98    426.79     91.64 o
      2096    1   3  -3   5     26.56     15.71    112.59 <
      2097    1   4  -3   5     74.36   -497.48    369.18 <
      2098    1   5  -3   5   1088.41   1034.24    240.89 o
      2099    1   6  -3   5    345.06    230.41    280.16 <
      2100    1   7  -3   5   1224.22   1243.70    405.84 o
      2101    1   8  -3   5   1253.05   1987.31    510.57 o
      2102    1   9  -3   5    317.54   -188.52    416.31 <
      2103    1 -10  -2   5   2028.77   2848.74    602.21 o
      2104    1  -9  -2   5    475.65    343.00    371.80 <
      2105    1  -8  -2   5    502.16    240.89    335.14 <
      2106    1  -7  -2   5    389.06    115.21    332.53 <
      2107    1  -6  -2   5   2004.74   2432.42    340.38 o
      2108    1  -5  -2   5     38.75    -31.42    164.95 <
      2109    1  -4  -2   5   3309.31   3851.55    308.96 o
      2110    1  -3  -2   5   1499.14   1641.69    198.99 o
      2111    1  -2  -2   5    471.25    638.87    117.82 o
      2112    1  -1  -2   5     36.38    227.79     96.88 <
      2113    1   0  -2   5     96.28     49.75     94.26 <
      2114    1   1  -2   5    311.84    288.02    104.73 <
      2115    1   2  -2   5   1642.23   1948.03    138.77 o
      2116    1   3  -2   5    176.20    102.11    175.43 <
      2117    1   4  -2   5   2987.11   3550.45    397.98 o
      2118    1   5  -2   5    400.12    358.71    269.69 <
      2119    1   6  -2   5    270.25    704.33    301.11 <
      2120    1   7  -2   5      0.69    212.08    298.49 <
      2121    1   8  -2   5    143.88    356.09    358.71 <
      2122    1   9  -2   5      8.29     52.37    227.79 <
      2123    1  10  -2   5    114.13    222.56    280.16 <
      2124    3   8   3  15    952.12    -23.56    748.84 <
      2124    2   2  11  -7    952.12    -23.56    748.84 <
      2124    1 -10  -1   5    952.12    -23.56    748.84 <
      2125    1  -9  -1   5     21.26    133.54    377.04 <
      2126    3   7   3  12  10921.40  11298.10    963.54 o
      2126    2   1   9  -6  10921.40  11298.10    963.54 o
      2126    1  -8  -1   5  10921.40  11298.10    963.54 o
      2127    1  -7  -1   5    247.84    138.77    238.27 <
      2128    3   6   3   9   8197.81   9640.67    665.05 o
      2128    2   0   7  -5   8197.81   9640.67    665.05 o
      2128    1  -6  -1   5   8197.81   9640.67    665.05 o
      2129    1  -5  -1   5    195.59    -52.37    159.72 <
      2130    3   5   3   6  82618.10  89321.50   2932.52 o
      2130    2  -1   5  -4  82618.10  89321.50   2932.52 o
      2130    1  -4  -1   5  82618.10  89321.50   2932.52 o
      2131    1  -3  -1   5     58.36    -15.71    112.59 <
      2132    3   4   3   3 143542.00 153232.00   4925.07 o
      2132    2  -2   3  -3 143542.00 153232.00   4925.07 o
      2132    1  -2  -1   5 143542.00 153232.00   4925.07 o
      2133    1  -1  -1   5    205.80    115.21     86.40 <
      2134    3   3   3   0   3316.20   3927.49    240.89 o
      2134    2  -3   1  -2   3316.20   3927.49    240.89 o
      2134    1   0  -1   5   3316.20   3927.49    240.89 o
      2135    1   1  -1   5     48.13    -47.13     83.79 <
      2136    3   2   3  -3  35966.20  30513.90    934.74 o
      2136    2  -4  -1  -1  35966.20  30513.90    934.74 o
      2136    1   2  -1   5  35966.20  30513.90    934.74 o
      2137    1   3  -1   5     83.34     -7.85     68.08 <
      2138    3   1   3  -6  17073.70  16704.90   1042.09 o
      2138    2  -5  -3   0  17073.70  16704.90   1042.09 o
      2138    1   4  -1   5  17073.70  16704.90   1042.09 o
      2139    1   5  -1   5      7.90     70.69    212.08 <
      2140    3   0   3  -9  27124.20  27047.30   1667.87 o
      2140    2  -6  -5   1  27124.20  27047.30   1667.87 o
      2140    1   6  -1   5  27124.20  27047.30   1667.87 o
      2141    1   7  -1   5     87.63   -227.79    251.36 <
      2142    3  -1   3 -12  39015.80  38366.30   1550.05 o
      2142    2  -7  -7   2  39015.80  38366.30   1550.05 o
      2142    1   8  -1   5  39015.80  38366.30   1550.05 o
      2143    1   9  -1   5    373.14     36.66    233.03 <
      2144    3  -2   3 -15  13353.30  14146.80    785.50 o
      2144    2  -8  -9   3  13353.30  14146.80    785.50 o
      2144    1  10  -1   5  13353.30  14146.80    785.50 o
      2145    1  -9   0   5     37.67     65.46    424.17 <
      2146    1  -8   0   5    448.45   -219.94    316.82 <
      2147    1  -7   0   5    257.38    214.70    227.79 <
      2148    1  -6   0   5   1708.75   1992.54    311.58 o
      2149    1  -5   0   5    940.71    680.76    191.14 o
      2150    1  -4   0   5    243.01    -18.33    123.06 <
      2151    1  -3   0   5     35.84    151.86    109.97 <
      2152    1  -2   0   5    129.78     91.64    102.11 <
      2153    1  -1   0   5     14.11     23.56     91.64 <
      2154    1   0   0   5    293.63    267.07    104.73 <
      2155    1   1   0   5     48.80    -86.40     91.64 <
      2156    1   2   0   5    107.65    183.28     73.31 <
      2157    1   3   0   5     60.81     75.93     70.69 <
      2158    1   4   0   5    212.15    369.18     83.79 o
      2159    1   5   0   5    591.36    308.96    128.30 <
      2160    1   6   0   5   3003.13   3134.13    256.60 o
      2161    1   7   0   5    451.66    316.82    172.81 <
      2162    1   8   0   5    317.24     26.18    198.99 <
      2163    1   9   0   5    142.13    201.61    204.23 <
      2164    1  10   0   5    129.42    -86.40    251.36 <
      2165    1  -9   1   5    305.70    -13.09    280.16 <
      2166    1  -8   1   5   2218.54   1940.18    314.20 o
      2167    1  -7   1   5    526.00    759.31    290.63 <
      2168    1  -6   1   5    118.81    301.11    261.83 <
      2169    1  -5   1   5   6011.98   6681.96    479.15 o
      2170    1  -4   1   5    107.86    146.63    117.82 <
      2171    1  -3   1   5    398.87    434.64    120.44 o
      2172    1  -2   1   5   1795.55   1759.51    178.05 o
      2173    1  -1   1   5    333.39    240.89    170.19 <
      2174    1   0   1   5    102.26     -5.24     94.26 <
      2175    1   1   1   5   1532.17   1280.36    117.82 o
      2176    1   2   1   5    973.14    890.23     94.26 o
      2177    1   3   1   5    229.00    452.97     83.79 o
      2178    1   4   1   5      0.84     10.47     68.08 <
      2179    1   5   1   5   2127.46   2102.51    149.24 o
      2180    1   6   1   5    120.58    196.37    107.35 <
      2181    1   7   1   5    101.13    209.47    141.39 <
      2182    1   8   1   5    582.34    390.13    209.47 <
      2183    1   9   1   5     42.84   -238.27    219.94 <
      2184    1  10   1   5    107.12     99.50    267.07 <
      2185    1  11   1   5    722.24    866.66    416.31 <
      2186    3   6   4  16   3701.60   4157.90    455.59 o
      2186    2   3  12  -3   3701.60   4157.90    455.59 o
      2186    1  -9   2   5   3701.60   4157.90    455.59 o
      2187    1  -8   2   5    145.96    188.52    259.21 <
      2188    3   5   4  13  14711.10  14060.40    720.04 o
      2188    2   2  10  -2  14711.10  14060.40    720.04 o
      2188    1  -7   2   5  14711.10  14060.40    720.04 o
      2189    1  -6   2   5    474.16    272.31    167.57 <
      2190    3   4   4  10  39652.10  40474.10   1419.13 o
      2190    2   1   8  -1  39652.10  40474.10   1419.13 o
      2190    1  -5   2   5  39652.10  40474.10   1419.13 o
      2191    1  -4   2   5     40.01     70.69    120.44 <
      2192    3   3   4   7 172209.00 174590.00   5676.53 o
      2192    2   0   6   0 172209.00 174590.00   5676.53 o
      2192    1  -3   2   5 172209.00 174590.00   5676.53 o
      2193    1  -2   2   5     40.67     20.95     94.26 <
      2194    3   2   4   4   9560.01   8734.73    392.75 o
      2194    2  -1   4   1   9560.01   8734.73    392.75 o
      2194    1  -1   2   5   9560.01   8734.73    392.75 o
      2195    1   0   2   5     33.55    133.54    104.73 <
      2196    3   1   4   1   7083.06   6875.72    322.05 o
      2196    2  -2   2   2   7083.06   6875.72    322.05 o
      2196    1   1   2   5   7083.06   6875.72    322.05 o
      2197    1   2   2   5     15.95    -65.46     99.50 <
      2198    3   0   4  -2  31668.70  27908.70    947.83 o
      2198    2  -3   0   3  31668.70  27908.70    947.83 o
      2198    1   3   2   5  31668.70  27908.70    947.83 o
      2199    1   4   2   5      0.40     75.93     89.02 <
      2200    3  -1   4  -5   3801.44   3754.68    225.18 o
      2200    2  -4  -2   4   3801.44   3754.68    225.18 o
      2200    1   5   2   5   3801.44   3754.68    225.18 o
      2201    1   6   2   5     69.72    115.21    117.82 <
      2202    3  -2   4  -8  34787.70  37696.00   1445.31 o
      2202    2  -5  -4   5  34787.70  37696.00   1445.31 o
      2202    1   7   2   5  34787.70  37696.00   1445.31 o
      2203    1   8   2   5      1.43   -222.56    154.48 <
      2204    3  -3   4 -11  34778.80  36900.00   1440.08 o
      2204    2  -6  -6   6  34778.80  36900.00   1440.08 o
      2204    1   9   2   5  34778.80  36900.00   1440.08 o
      2205    1  10   2   5      0.68    -86.40    238.27 <
      2206    3  -4   4 -14  10332.20  11601.80    898.09 o
      2206    2  -7  -8   7  10332.20  11601.80    898.09 o
      2206    1  11   2   5  10332.20  11601.80    898.09 o
      2207    1  -9   3   5    103.82    -31.42    335.14 <
      2208    1  -8   3   5    828.45    379.66    282.78 <
      2209    1  -7   3   5    102.81    133.54    217.32 <
      2210    1  -6   3   5     32.03    115.21    209.47 <
      2211    1  -5   3   5    586.07    759.31    198.99 o
      2212    1  -4   3   5   1197.25   1180.86    193.76 o
      2213    1  -3   3   5     91.45     96.88    120.44 <
      2214    1  -2   3   5     69.19    214.70    125.68 <
      2215    1  -1   3   5     37.91    280.16    125.68 <
      2216    1   0   3   5   1722.19   1188.72    146.63 o
      2217    1   1   3   5     95.19    125.68    112.59 <
      2218    1   2   3   5    162.12    196.37    120.44 <
      2219    1   3   3   5      0.37    -10.47    104.73 <
      2220    1   4   3   5    574.42    769.79    125.68 o
      2221    1   5   3   5   1409.74   1851.15    157.10 o
      2222    1   6   3   5    411.32    214.70    141.39 <
      2223    1   7   3   5    297.02    369.18    170.19 <
      2224    1   8   3   5    377.28     18.33    172.81 <
      2225    1   9   3   5     61.78   -112.59    188.52 <
      2226    1  10   3   5    200.72    157.10    261.83 <
      2227    1  11   3   5    209.22    363.95    432.02 <
      2228    1  -8   4   5     16.58    259.21    298.49 <
      2229    1  -7   4   5   1852.05   1618.12    329.91 o
      2230    1  -6   4   5   1942.84   2568.58    369.18 o
      2231    1  -5   4   5     73.87    240.89    183.28 <
      2232    1  -4   4   5   3189.06   3665.65    308.96 o
      2233    1  -3   4   5   2027.83   1961.12    233.03 o
      2234    1  -2   4   5    135.51     73.31    141.39 <
      2235    1  -1   4   5   1536.24   1269.89    164.95 o
      2236    1   0   4   5     92.02    225.18    125.68 <
      2237    1   1   4   5    838.00    722.66    162.34 o
      2238    1   2   4   5    311.06    392.75    125.68 o
      2239    1   3   4   5   2081.99   1827.59    175.43 o
      2240    1   4   4   5   1064.79   1301.31    162.34 o
      2241    1   5   4   5     90.91     36.66    125.68 <
      2242    1   6   4   5    386.47    576.03    180.66 o
      2243    1   7   4   5    940.99    903.32    201.61 o
      2244    1   8   4   5     81.24    180.66    212.08 <
      2245    1   9   4   5    571.49   1254.18    288.02 o
      2246    1  10   4   5    283.68    227.79    274.92 <
      2247    1  11   4   5     75.62    426.79    332.53 <
      2248    3   4   5  17   5383.36   6770.99    667.67 o
      2248    2   4  13   1   5383.36   6770.99    667.67 o
      2248    1  -8   5   5   5383.36   6770.99    667.67 o
      2249    1  -7   5   5    306.41     73.31    363.95 <
      2250    3   3   5  14   2433.52   2194.16    400.60 o
      2250    2   3  11   2   2433.52   2194.16    400.60 o
      2250    1  -6   5   5   2433.52   2194.16    400.60 o
      2251    1  -5   5   5    238.22    335.14    230.41 <
      2252    3   2   5  11  40319.50  46705.70   1796.17 o
      2252    2   2   9   3  40319.50  46705.70   1796.17 o
      2252    1  -4   5   5  40319.50  46705.70   1796.17 o
      2253    1  -3   5   5    114.82    434.64    191.14 <
      2254    3   1   5   8  41374.80  40610.20   1398.18 o
      2254    2   1   7   4  41374.80  40610.20   1398.18 o
      2254    1  -2   5   5  41374.80  40610.20   1398.18 o
      2255    1  -1   5   5     51.32     -5.24    138.77 <
      2256    3   0   5   5   9211.43   8200.59    382.27 o
      2256    2   0   5   5   9211.43   8200.59    382.27 o
      2256    1   0   5   5   9211.43   8200.59    382.27 o
      2257    1   1   5   5      6.41    -13.09    123.06 <
      2258    3  -1   5   2  15419.60  15958.70    562.94 o
      2258    2  -1   3   6  15419.60  15958.70    562.94 o
      2258    1   2   5   5  15419.60  15958.70    562.94 o
      2259    1   3   5   5     52.86     81.17    130.92 <
      2260    3  -2   5  -1  47304.30  46386.20   1447.93 o
      2260    2  -2   1   7  47304.30  46386.20   1447.93 o
      2260    1   4   5   5  47304.30  46386.20   1447.93 o
      2261    1   5   5   5    140.96     10.47    115.21 <
      2262    3  -3   5  -4  36452.10  37800.70   1468.88 o
      2262    2  -3  -1   8  36452.10  37800.70   1468.88 o
      2262    1   6   5   5  36452.10  37800.70   1468.88 o
      2263    1   7   5   5      9.74    138.77    235.65 <
      2264    3  -4   5  -7  43453.10  45407.00   2482.17 o
      2264    2  -4  -3   9  43453.10  45407.00   2482.17 o
      2264    1   8   5   5  43453.10  45407.00   2482.17 o
      2265    1   9   5   5      0.34   -481.77    259.21 <
      2266    3  -5   5 -10  21208.20  22886.80   1424.37 o
      2266    2  -5  -5  10  21208.20  22886.80   1424.37 o
      2266    1  10   5   5  21208.20  22886.80   1424.37 o
      2267    1  11   5   5     62.23    117.82    497.48 <
      2268    1  -7   6   5    157.59    353.47    594.36 <
      2269    1  -6   6   5     47.23   -350.86    295.87 <
      2270    1  -5   6   5    908.22   1199.19    329.91 o
      2271    1  -4   6   5    187.72     52.37    238.27 <
      2272    1  -3   6   5    211.94   -109.97    198.99 <
      2273    1  -2   6   5     63.44    225.18    188.52 <
      2274    1  -1   6   5    296.21    531.52    170.19 o
      2275    1   0   6   5      1.25    217.32    146.63 <
      2276    1   1   6   5    913.79    953.07    172.81 o
      2277    1   2   6   5    801.36   1131.12    209.47 o
      2278    1   3   6   5      2.85     65.46    144.01 <
      2279    1   4   6   5   1404.51   1576.23    222.56 o
      2280    1   5   6   5   1488.46   1591.94    235.65 o
      2281    1   6   6   5    400.59    295.87    198.99 <
      2282    1   7   6   5     17.88    -91.64    253.98 <
      2283    1   8   6   5    424.90    562.94    303.73 <
      2284    1   9   6   5     12.22   -345.62    416.31 <
      2285    1  10   6   5    133.85     44.51    455.59 <
      2286    1  11   6   5    484.64    -26.18    531.52 <
      2287    1  -7   7   5    487.02   1887.81    772.41 <
      2288    1  -6   7   5    486.86    570.79    361.33 <
      2289    1  -5   7   5   1688.70   1523.86    405.84 o
      2290    1  -4   7   5    251.73    877.14    322.05 <
      2291    1  -3   7   5    301.10    285.40    243.50 <
      2292    1  -2   7   5   1573.74   1432.22    269.69 o
      2293    1  -1   7   5    258.10     60.22    206.85 <
      2294    1   0   7   5   1009.57    604.83    193.76 o
      2295    1   1   7   5     39.42    157.10    201.61 <
      2296    1   2   7   5   2000.98   2076.33    267.07 o
      2297    1   3   7   5     39.02     57.60    204.23 <
      2298    1   4   7   5    395.97    877.14    298.49 <
      2299    1   5   7   5    146.01    102.11    267.07 <
      2300    1   6   7   5    244.12    253.98    295.87 <
      2301    1   7   7   5    198.53    303.73    439.88 <
      2302    1   8   7   5   2542.69   3199.59    759.31 o
      2303    1   9   7   5     15.83    -10.47    400.60 <
      2304    1  10   7   5    101.47   1227.99    636.25 <
      2305    1  11   7   5   1369.67   1487.21    759.31 <
      2306    1  -6   8   5    236.09    515.81    704.33 <
      2307    3   1   6  15   2578.92   3241.49    507.95 o
      2307    2   4  12   6   2578.92   3241.49    507.95 o
      2307    1  -5   8   5   2578.92   3241.49    507.95 o
      2308    1  -4   8   5    259.68    -99.50    308.96 <
      2309    3   0   6  12  23842.00  26628.40   1306.54 o
      2309    2   3  10   7  23842.00  26628.40   1306.54 o
      2309    1  -3   8   5  23842.00  26628.40   1306.54 o
      2310    1  -2   8   5    162.37    157.10    285.40 <
      2311    3  -1   6   9   1850.43   2806.84    387.51 o
      2311    2   2   8   8   1850.43   2806.84    387.51 o
      2311    1  -1   8   5   1850.43   2806.84    387.51 o
      2312    1   0   8   5      8.34   -136.15    272.31 <
      2313    3  -2   6   6    847.01    233.03    225.18 <
      2313    2   1   6   9    847.01    233.03    225.18 <
      2313    1   1   8   5    847.01    233.03    225.18 <
      2314    1   2   8   5      0.18     18.33    201.61 <
      2315    3  -3   6   3   7483.20   8548.83    767.17 o
      2315    2   0   4  10   7483.20   8548.83    767.17 o
      2315    1   3   8   5   7483.20   8548.83    767.17 o
      2316    1   4   8   5    116.05    329.91    329.91 <
      2317    3  -4   6   0  15769.90  15631.40   1076.13 o
      2317    2  -1   2  11  15769.90  15631.40   1076.13 o
      2317    1   5   8   5  15769.90  15631.40   1076.13 o
      2318    1   6   8   5     20.37     20.95    282.78 <
      2319    3  -5   6  -3  23462.40  22399.80   2042.29 o
      2319    2  -2   0  12  23462.40  22399.80   2042.29 o
      2319    1   7   8   5  23462.40  22399.80   2042.29 o
      2320    1   8   8   5     52.79     94.26    429.40 <
      2321    3  -6   6  -6  17683.20  19786.70   1906.14 o
      2321    2  -3  -2  13  17683.20  19786.70   1906.14 o
      2321    1   9   8   5  17683.20  19786.70   1906.14 o
      2322    1  10   8   5    123.16   -306.34    586.51 <
      2323    1  -5   9   5      4.37    298.49    387.51 <
      2324    1  -4   9   5    269.23    617.92    411.08 <
      2325    1  -3   9   5      0.50     54.98    327.29 <
      2326    1  -2   9   5     37.06    390.13    337.76 <
      2327    1  -1   9   5    270.14    141.39    301.11 <
      2328    1   0   9   5   1366.80    408.46    332.53 <
      2329    1   1   9   5    300.31   -421.55    295.87 <
      2330    1   2   9   5    307.00    507.95    552.47 <
      2331    1   3   9   5    119.70    361.33    324.67 <
      2332    1   4   9   5    516.85    712.18    361.33 <
      2333    1   5   9   5   1626.49   1120.64    405.84 <
      2334    1   6   9   5   1318.10   1340.58    411.08 o
      2335    1   7   9   5    198.05    382.27    492.24 <
      2336    1   8   9   5     90.25   -377.04    426.79 <
      2337    1   9   9   5    254.96    947.83    646.73 <
      2338    1  10   9   5     91.21    806.44    709.57 <
      2339    1  -4  10   5    510.10    120.44    379.66 <
      2340    1  -3  10   5    694.59    822.15    424.17 <
      2341    1  -2  10   5    203.09   -109.97    361.33 <
      2342    1  -1  10   5   1581.09   2309.36    460.83 o
      2343    1   0  10   5     73.25   -146.63    424.17 <
      2344    1   1  10   5   1346.66   1026.38    568.18 <
      2345    1   2  10   5      9.04   -136.15    552.47 <
      2346    1   3  10   5   1159.21   1188.72    599.60 <
      2347    1   4  10   5     83.72     99.50    356.09 <
      2348    1   5  10   5    117.77   -130.92    374.42 <
      2349    1   6  10   5     56.35   -329.91    329.91 <
      2350    1   7  10   5   1231.26   1091.84    452.97 <
      2351    1   8  10   5     72.42      7.85    602.21 <
      2352    1   9  10   5    963.56    945.22    725.28 <
      2353    1  -3  11   5    163.87   -528.90    397.98 <
      2354    3  -2   7  13    508.62   1076.13    625.78 <
      2354    2   4  11  11    508.62   1076.13    625.78 <
      2354    1  -2  11   5    508.62   1076.13    625.78 <
      2355    1  -1  11   5      6.33     52.37    487.01 <
      2356    3  -3   7  10   1659.39     83.79    536.76 <
      2356    2   3   9  12   1659.39     83.79    536.76 <
      2356    1   0  11   5   1659.39     83.79    536.76 <
      2357    1   1  11   5      9.91    471.30    494.86 <
      2358    3  -4   7   7   2618.98   4495.66    945.22 o
      2358    2   2   7  13   2618.98   4495.66    945.22 o
      2358    1   2  11   5   2618.98   4495.66    945.22 o
      2359    1   3  11   5     47.16    -23.56    541.99 <
      2360    3  -5   7   4  11206.90   9415.49   1366.77 o
      2360    2   1   5  14  11206.90   9415.49   1366.77 o
      2360    1   4  11   5  11206.90   9415.49   1366.77 o
      2361    1   5  11   5     81.21    416.31    413.70 <
      2362    3  -6   7   1  10173.40   5990.73    759.31 o
      2362    2   0   3  15  10173.40   5990.73    759.31 o
      2362    1   6  11   5  10173.40   5990.73    759.31 o
      2363    1   7  11   5     22.56   -748.84    426.79 <
      2364    3  -7   7  -2  13500.30  11654.20   1565.76 o
      2364    2  -1   1  16  13500.30  11654.20   1565.76 o
      2364    1   8  11   5  13500.30  11654.20   1565.76 o
      2365    1   9  11   5    166.73    214.70    633.63 <
      2366    1  -1  12   5    110.81     31.42    583.89 <
      2367    1   0  12   5     70.40   -625.78    468.68 <
      2368    1   1  12   5    416.68   -198.99    544.61 <
      2369    1   2  12   5    710.98    547.23    607.45 <
      2370    1   3  12   5     12.51   -206.85    549.85 <
      2371    1   4  12   5    286.00    746.22    607.45 <
      2372    1   5  12   5    226.41    641.49    633.63 <
      2373    1   6  12   5      5.90   -426.79    714.80 <
      2374    1   7  12   5     98.04     73.31    497.48 <
      2375    1   1  13   5      9.13    871.90    638.87 <
      2376    1   2  13   5    594.41   -463.44    602.21 <
      2377    1   3  13   5     14.47     73.31    683.38 <
      2378    1   4  13   5    400.19    246.12    738.37 <
      2379    1   5  13   5     40.51    858.81    811.68 <
      2380    1   6  13   5    734.86   -248.74    651.96 <
      2381    1  -4 -11   6    732.55   1298.69    693.86 <
      2382    1  -3 -11   6    859.60    282.78    607.45 <
      2383    1  -2 -11   6      0.42     13.09    547.23 <
      2384    1  -1 -11   6     25.30    -47.13    507.95 <
      2385    1   0 -11   6    130.00    274.92    526.28 <
      2386    1   1 -11   6    334.70    494.86    481.77 <
      2387    1  -6 -10   6     21.26    227.79    644.11 <
      2388    1  -5 -10   6    226.02    421.55    665.05 <
      2389    1  -4 -10   6    629.58   1361.53    704.33 <
      2390    1  -3 -10   6    137.09    657.20    534.14 <
      2391    1  -2 -10   6    523.88    222.56    573.41 <
      2392    1  -1 -10   6    505.84    151.86    481.77 <
      2393    1   0 -10   6    386.87    468.68    408.46 <
      2394    1   1 -10   6    322.18    651.96    416.31 <
      2395    1   2 -10   6    597.99    497.48    395.37 <
      2396    1   3 -10   6     19.65    -62.84    686.00 <
      2397    3  11   1   4  12559.90  13089.00   1306.54 o
      2397    2  -4   3 -15  12559.90  13089.00   1306.54 o
      2397    1  -7  -9   6  12559.90  13089.00   1306.54 o
      2398    1  -6  -9   6    419.04   1083.99    717.42 <
      2399    3  10   1   1  15565.80  18317.80   2123.46 o
      2399    2  -5   1 -14  15565.80  18317.80   2123.46 o
      2399    1  -5  -9   6  15565.80  18317.80   2123.46 o
      2400    1  -4  -9   6      0.17   -610.07    481.77 <
      2401    3   9   1  -2  10813.80  14623.30   1735.95 o
      2401    2  -6  -1 -13  10813.80  14623.30   1735.95 o
      2401    1  -3  -9   6  10813.80  14623.30   1735.95 o
      2402    1  -2  -9   6      2.75    374.42    510.57 <
      2403    3   8   1  -5  11087.90  11232.60   1372.00 o
      2403    2  -7  -3 -12  11087.90  11232.60   1372.00 o
      2403    1  -1  -9   6  11087.90  11232.60   1372.00 o
      2404    1   0  -9   6     19.55    513.19    390.13 <
      2405    3   7   1  -8   3568.40   3087.00    487.01 o
      2405    2  -8  -5 -11   3568.40   3087.00    487.01 o
      2405    1   1  -9   6   3568.40   3087.00    487.01 o
      2406    1   2  -9   6      7.32   -107.35    316.82 <
      2407    3   6   1 -11    246.49   -151.86    345.62 <
      2407    2  -9  -7 -10    246.49   -151.86    345.62 <
      2407    1   3  -9   6    246.49   -151.86    345.62 <
      2408    1   4  -9   6      0.85   -382.27    361.33 <
      2409    1  -8  -8   6    101.93    693.86    751.46 <
      2410    1  -7  -8   6    647.82    746.22    463.44 <
      2411    1  -6  -8   6     44.86     99.50    421.55 <
      2412    1  -5  -8   6   1203.67   1034.24    696.47 <
      2413    1  -4  -8   6    937.01    644.11    507.95 <
      2414    1  -3  -8   6    428.58   -534.14    466.06 <
      2415    1  -2  -8   6    592.83   -348.24    390.13 <
      2416    1  -1  -8   6     42.02   -175.43    324.67 <
      2417    1   0  -8   6      6.84     47.13    301.11 <
      2418    1   1  -8   6    312.75    162.34    308.96 <
      2419    1   2  -8   6    945.14    945.22    259.21 o
      2420    1   3  -8   6    558.27    830.01    332.53 <
      2421    1   4  -8   6   1840.63   2275.32    403.22 o
      2422    1   5  -8   6    477.10    356.09    322.05 <
      2423    1   6  -8   6     52.51    -18.33    335.14 <
      2424    1  -8  -7   6   1626.39   1958.51    840.48 <
      2425    1  -7  -7   6    166.18    369.18    458.21 <
      2426    1  -6  -7   6    753.24   1235.85    497.48 <
      2427    1  -5  -7   6     69.69     65.46    353.47 <
      2428    1  -4  -7   6     98.91    730.51    379.66 <
      2429    1  -3  -7   6   1010.71   1005.44    513.19 <
      2430    1  -2  -7   6   2363.16   4341.18    568.18 o
      2431    1  -1  -7   6     36.44   -233.03    301.11 <
      2432    1   0  -7   6      0.07    164.95    303.73 <
      2433    1   1  -7   6    113.75    251.36    217.32 <
      2434    1   2  -7   6    705.70   1112.79    233.03 o
      2435    1   3  -7   6    540.82    798.59    285.40 <
      2436    1   4  -7   6    460.74    534.14    267.07 <
      2437    1   5  -7   6     54.17     62.84    235.65 <
      2438    1   6  -7   6      7.69   -219.94    235.65 <
      2439    1  -9  -6   6    255.55    730.51    657.20 <
      2440    3  10   2   8  16309.20  16985.10   2065.86 o
      2440    2  -2   6 -12  16309.20  16985.10   2065.86 o
      2440    1  -8  -6   6  16309.20  16985.10   2065.86 o
      2441    1  -7  -6   6    168.39   1301.31    722.66 <
      2442    3   9   2   5  38935.30  38426.50   2306.74 o
      2442    2  -3   4 -11  38935.30  38426.50   2306.74 o
      2442    1  -6  -6   6  38935.30  38426.50   2306.74 o
      2443    1  -5  -6   6     27.18    -18.33    324.67 <
      2444    3   8   2   2  32243.30  34114.10   2037.06 o
      2444    2  -4   2 -10  32243.30  34114.10   2037.06 o
      2444    1  -4  -6   6  32243.30  34114.10   2037.06 o
      2445    1  -3  -6   6    116.69    185.90    301.11 <
      2446    3   7   2  -1  13972.50  13539.40    761.93 o
      2446    2  -5   0  -9  13972.50  13539.40    761.93 o
      2446    1  -2  -6   6  13972.50  13539.40    761.93 o
      2447    1  -1  -6   6     44.37    -68.08    272.31 <
      2448    3   6   2  -4  44356.10  44409.40   1948.03 o
      2448    2  -6  -2  -8  44356.10  44409.40   1948.03 o
      2448    1   0  -6   6  44356.10  44409.40   1948.03 o
      2449    1   1  -6   6     78.79    256.60    196.37 <
      2450    3   5   2  -7   4306.69   4972.20    377.04 o
      2450    2  -7  -4  -7   4306.69   4972.20    377.04 o
      2450    1   2  -6   6   4306.69   4972.20    377.04 o
      2451    1   3  -6   6    118.31    198.99    217.32 <
      2452    3   4   2 -10   3599.06   3880.36    371.80 o
      2452    2  -8  -6  -6   3599.06   3880.36    371.80 o
      2452    1   4  -6   6   3599.06   3880.36    371.80 o
      2453    1   5  -6   6    146.99   -219.94    180.66 <
      2454    1   7  -6   6    389.71    128.30    586.51 <
      2455    1  -9  -5   6    536.80    672.91    625.78 <
      2456    1  -8  -5   6   1360.94   1324.87    712.18 <
      2457    1  -7  -5   6      3.51     89.02    568.18 <
      2458    1  -6  -5   6    491.30    293.25    361.33 <
      2459    1  -5  -5   6     98.43    259.21    361.33 <
      2460    1  -4  -5   6    880.12   1089.22    371.80 <
      2461    1  -3  -5   6      4.20   -178.05    261.83 <
      2462    1  -2  -5   6    232.96     83.79    209.47 <
      2463    1  -1  -5   6     31.44    204.23    159.72 <
      2464    1   0  -5   6    124.11    411.08    183.28 <
      2465    1   1  -5   6      9.94    -41.89    157.10 <
      2466    1   2  -5   6     58.03    136.15    125.68 <
      2467    1   3  -5   6    956.25    882.38    201.61 o
      2468    1   4  -5   6   1083.13   1576.23    227.79 o
      2469    1   6  -5   6      9.72    230.41    458.21 <
      2470    1   7  -5   6      0.49   -557.70    466.06 <
      2471    1   8  -5   6    476.80    104.73    539.38 <
      2472    1  -9  -4   6    605.36    670.29    434.64 <
      2473    1  -8  -4   6     57.57    434.64    397.98 <
      2474    1  -7  -4   6   2363.42   3484.99    549.85 o
      2475    1  -6  -4   6    350.57    526.28    264.45 <
      2476    1  -5  -4   6     18.18    -41.89    316.82 <
      2477    1  -4  -4   6    192.35    738.37    348.24 <
      2478    1  -3  -4   6   1710.88   2220.34    421.55 o
      2479    1  -2  -4   6    992.38   1298.69    206.85 o
      2480    1  -1  -4   6   3709.43   5684.38    434.64 o
      2481    1   0  -4   6     91.29      2.62    115.21 <
      2482    1   1  -4   6   1375.53   1932.32    188.52 o
      2483    1   2  -4   6    263.83    494.86    123.06 o
      2484    1   3  -4   6     53.12     78.55    133.54 <
      2485    1   4  -4   6     69.22    198.99    115.21 <
      2486    1   6  -4   6      2.02    350.86    384.89 <
      2487    1   7  -4   6    763.14    596.98    439.88 <
      2488    1   8  -4   6     23.69    162.34    392.75 <
      2489    1   9  -4   6    172.51    604.83    599.60 <
      2490    3   9   3  12  17420.30  17011.20   1246.32 o
      2490    2   0   9  -9  17420.30  17011.20   1246.32 o
      2490    1  -9  -3   6  17420.30  17011.20   1246.32 o
      2491    1  -8  -3   6    156.87   -458.21    332.53 <
      2492    3   8   3   9  25183.80  25049.50   1576.23 o
      2492    2  -1   7  -8  25183.80  25049.50   1576.23 o
      2492    1  -7  -3   6  25183.80  25049.50   1576.23 o
      2493    1  -6  -3   6    197.44    274.92    246.12 <
      2494    3   7   3   6  44897.80  48805.60   2217.72 o
      2494    2  -2   5  -7  44897.80  48805.60   2217.72 o
      2494    1  -5  -3   6  44897.80  48805.60   2217.72 o
      2495    1  -4  -3   6    151.69    -18.33    193.76 <
      2496    3   6   3   3   4486.24   4634.43    418.93 o
      2496    2  -3   3  -6   4486.24   4634.43    418.93 o
      2496    1  -3  -3   6   4486.24   4634.43    418.93 o
      2497    1  -2  -3   6     12.71   -120.44    164.95 <
      2498    3   5   3   0  18611.40  17694.60    646.73 o
      2498    2  -4   1  -5  18611.40  17694.60    646.73 o
      2498    1  -1  -3   6  18611.40  17694.60    646.73 o
      2499    1   0  -3   6      0.46    -86.40    115.21 <
      2500    3   4   3  -3  26535.60  24871.50    955.69 o
      2500    2  -5  -1  -4  26535.60  24871.50    955.69 o
      2500    1   1  -3   6  26535.60  24871.50    955.69 o
      2501    1   2  -3   6      3.86     62.84     94.26 <
      2502    3   3   3  -6   3197.67   3406.44    285.40 o
      2502    2  -6  -3  -3   3197.67   3406.44    285.40 o
      2502    1   3  -3   6   3197.67   3406.44    285.40 o
      2503    3   2   3  -9  55416.80  55021.50   3152.46 o
      2503    2  -7  -5  -2  55416.80  55021.50   3152.46 o
      2503    1   5  -3   6  55416.80  55021.50   3152.46 o
      2504    1   6  -3   6    583.68    850.96    353.47 <
      2505    3   1   3 -12  26887.30  23832.00   1581.47 o
      2505    2  -8  -7  -1  26887.30  23832.00   1581.47 o
      2505    1   7  -3   6  26887.30  23832.00   1581.47 o
      2506    1   8  -3   6     19.28    264.45    384.89 <
      2507    3   0   3 -15  11792.10  12798.40   1207.05 o
      2507    2  -9  -9   0  11792.10  12798.40   1207.05 o
      2507    1   9  -3   6  11792.10  12798.40   1207.05 o
      2508    1  -9  -2   6    918.29    976.64    468.68 <
      2509    1  -8  -2   6    146.43    659.82    395.37 <
      2510    1  -7  -2   6    367.52    -34.04    295.87 <
      2511    1  -6  -2   6      0.53    144.01    274.92 <
      2512    1  -5  -2   6    293.22    282.78    209.47 <
      2513    1  -4  -2   6      2.67    -47.13    154.48 <
      2514    1  -3  -2   6   1511.56   1646.93    204.23 o
      2515    1  -2  -2   6    783.13    494.86    149.24 o
      2516    1  -1  -2   6    496.89    455.59    138.77 o
      2517    1   0  -2   6     18.31   -267.07     94.26 <
      2518    1   1  -2   6    119.99    227.79    102.11 <
      2519    1   2  -2   6     68.95     89.02     94.26 <
      2520    1   3  -2   6   1640.19   2178.45    141.39 o
      2521    1   4  -2   6    782.98    767.17    175.43 o
      2522    1   5  -2   6    127.18   -102.11    235.65 <
      2523    1   6  -2   6     11.70    251.36    272.31 <
      2524    1   7  -2   6     91.18    416.31    363.95 <
      2525    1   8  -2   6     59.96     -5.24    363.95 <
      2526    1   9  -2   6    671.74   1083.99    340.38 o
      2527    1  10  -2   6    529.35    843.10    285.40 <
      2528    1  -9  -1   6    285.45    138.77    384.89 <
      2529    1  -8  -1   6   2886.89   2890.63    515.81 o
      2530    1  -7  -1   6     94.40    144.01    322.05 <
      2531    1  -6  -1   6   1121.15    850.96    274.92 o
      2532    1  -5  -1   6   1338.21   1555.28    235.65 o
      2533    1  -4  -1   6      9.73    196.37    154.48 <
      2534    1  -3  -1   6     86.65    288.02    136.15 <
      2535    1  -2  -1   6   8678.95  10004.60    463.44 o
      2536    1  -1  -1   6    347.59    329.91    109.97 o
      2537    1   0  -1   6    214.55    377.04    104.73 o
      2538    1   1  -1   6    238.04    125.68     96.88 <
      2539    1   2  -1   6   1835.15   1982.07    167.57 o
      2540    1   3  -1   6    357.36    384.89     91.64 o
      2541    1   4  -1   6   1098.91   1015.91    141.39 o
      2542    1   5  -1   6    420.80    507.95    136.15 o
      2543    1   6  -1   6    172.45     28.80    193.76 <
      2544    1   7  -1   6     36.73    144.01    170.19 <
      2545    1   8  -1   6   2029.63   1942.80    272.31 o
      2546    1   9  -1   6      7.74    510.57    230.41 <
      2547    1  10  -1   6    266.14    -89.02    280.16 <
      2548    1  -9   0   6    249.71   -468.68    369.18 <
      2549    3   7   4  13  17861.10  13612.70   1500.30 o
      2549    2   1  10  -5  17861.10  13612.70   1500.30 o
      2549    1  -8   0   6  17861.10  13612.70   1500.30 o
      2550    1  -7   0   6     78.03   -256.60    248.74 <
      2551    3   6   4  10  38697.90  42390.70   1927.09 o
      2551    2   0   8  -4  38697.90  42390.70   1927.09 o
      2551    1  -6   0   6  38697.90  42390.70   1927.09 o
      2552    1  -5   0   6     96.73     60.22    180.66 <
      2553    3   5   4   7  13420.90  13146.60    599.60 o
      2553    2  -1   6  -3  13420.90  13146.60    599.60 o
      2553    1  -4   0   6  13420.90  13146.60    599.60 o
      2554    1  -3   0   6    530.10    363.95    133.54 <
      2555    3   4   4   4  11366.90  11787.70    518.43 o
      2555    2  -2   4  -2  11366.90  11787.70    518.43 o
      2555    1  -2   0   6  11366.90  11787.70    518.43 o
      2556    1  -1   0   6      2.39    -20.95     94.26 <
      2557    3   3   4   1 179890.00 182468.00   6501.30 o
      2557    2  -3   2  -1 179890.00 182468.00   6501.30 o
      2557    1   0   0   6 179890.00 182468.00   6501.30 o
      2558    1   1   0   6     14.62   -180.66     99.50 <
      2559    3   2   4  -2   8866.47   7951.85    361.33 o
      2559    2  -4   0   0   8866.47   7951.85    361.33 o
      2559    1   2   0   6   8866.47   7951.85    361.33 o
      2560    1   3   0   6    147.05    178.05     78.55 <
      2561    3   1   4  -5  30392.10  28992.70    903.32 o
      2561    2  -5  -2   1  30392.10  28992.70    903.32 o
      2561    1   4   0   6  30392.10  28992.70    903.32 o
      2562    1   5   0   6     12.87     68.08     99.50 <
      2563    3   0   4  -8  75274.00  74415.40   2778.04 o
      2563    2  -6  -4   2  75274.00  74415.40   2778.04 o
      2563    1   6   0   6  75274.00  74415.40   2778.04 o
      2564    1   7   0   6    135.55    209.47    175.43 <
      2565    3  -1   4 -11  12691.00  12879.50    651.96 o
      2565    2  -7  -6   3  12691.00  12879.50    651.96 o
      2565    1   8   0   6  12691.00  12879.50    651.96 o
      2566    1   9   0   6     55.73    293.25    233.03 <
      2567    3  -2   4 -14   7249.43   7957.09    573.41 o
      2567    2  -8  -8   4   7249.43   7957.09    573.41 o
      2567    1  10   0   6   7249.43   7957.09    573.41 o
      2568    1  -9   1   6     17.70     62.84    403.22 <
      2569    1  -8   1   6    549.09    898.09    324.67 <
      2570    1  -7   1   6    507.15    183.28    230.41 <
      2571    1  -6   1   6     10.66      7.85    295.87 <
      2572    1  -5   1   6    153.58     44.51    222.56 <
      2573    1  -4   1   6     65.34    146.63    138.77 <
      2574    1  -3   1   6    264.00    450.35    128.30 o
      2575    1  -2   1   6   1451.41   1945.41    180.66 o
      2576    1  -1   1   6    730.49    604.83    149.24 o
      2577    1   0   1   6     94.44    219.94    128.30 <
      2578    1   1   1   6    518.65    282.78    112.59 <
      2579    1   2   1   6     18.35     13.09     78.55 <
      2580    1   3   1   6     73.89      2.62    102.11 <
      2581    1   4   1   6   1026.35   1455.79    144.01 o
      2582    1   5   1   6    192.31    233.03    107.35 <
      2583    1   6   1   6      2.42     96.88    123.06 <
      2584    1   7   1   6    702.77    819.53    193.76 o
      2585    1   8   1   6    139.41    146.63    206.85 <
      2586    1   9   1   6     14.35   -246.12    235.65 <
      2587    1  10   1   6    230.49    -52.37    251.36 <
      2588    1  11   1   6    674.09    596.98    332.53 <
      2589    1  -9   2   6    630.96    117.82    424.17 <
      2590    1  -8   2   6     22.68   -107.35    301.11 <
      2591    1  -7   2   6   2992.06   2950.85    353.47 o
      2592    1  -6   2   6    571.06    850.96    217.32 o
      2593    1  -5   2   6    275.29    531.52    172.81 o
      2594    1  -4   2   6    756.14   1131.12    198.99 o
      2595    1  -3   2   6   2444.51   2414.09    206.85 o
      2596    1  -2   2   6     41.32    162.34    128.30 <
      2597    1  -1   2   6   5840.94   5710.56    363.95 o
      2598    1   0   2   6   5077.91   3987.71    253.98 o
      2599    1   1   2   6    823.98    968.78    149.24 o
      2600    1   2   2   6    147.87    269.69    117.82 <
      2601    1   3   2   6    153.90      0.00    102.11 <
      2602    1   4   2   6    340.15    285.40    117.82 <
      2603    1   5   2   6    751.29    960.92    117.82 o
      2604    1   6   2   6   1045.42    958.31    154.48 o
      2605    1   7   2   6   1720.76   2490.03    240.89 o
      2606    1   8   2   6     83.83    204.23    180.66 <
      2607    1   9   2   6   1770.12   1484.59    295.87 o
      2608    1  10   2   6    402.33    172.81    293.25 <
      2609    1  11   2   6    554.70    599.60    392.75 <
      2610    1  -8   3   6    211.04    214.70    324.67 <
      2611    3   5   5  14  15761.60  16220.50    809.06 o
      2611    2   2  11  -1  15761.60  16220.50    809.06 o
      2611    1  -7   3   6  15761.60  16220.50    809.06 o
      2612    1  -6   3   6     47.87     44.51    183.28 <
      2613    3   4   5  11  19788.70  22263.60    960.92 o
      2613    2   1   9   0  19788.70  22263.60    960.92 o
      2613    1  -5   3   6  19788.70  22263.60    960.92 o
      2614    1  -4   3   6    289.65    201.61    172.81 <
      2615    3   3   5   8  12271.20  11840.10    494.86 o
      2615    2   0   7   1  12271.20  11840.10    494.86 o
      2615    1  -3   3   6  12271.20  11840.10    494.86 o
      2616    1  -2   3   6    206.58    -34.04    130.92 <
      2617    3   2   5   5  15514.80  16474.50    623.16 o
      2617    2  -1   5   2  15514.80  16474.50    623.16 o
      2617    1  -1   3   6  15514.80  16474.50    623.16 o
      2618    1   0   3   6      6.42    -34.04    146.63 <
      2619    3   1   5   2  97402.70  96092.50   3139.37 o
      2619    2  -2   3   3  97402.70  96092.50   3139.37 o
      2619    1   1   3   6  97402.70  96092.50   3139.37 o
      2620    1   2   3   6      5.61    -20.95    117.82 <
      2621    3   0   5  -1   7571.83   7208.25    324.67 o
      2621    2  -3   1   4   7571.83   7208.25    324.67 o
      2621    1   3   3   6   7571.83   7208.25    324.67 o
      2622    1   4   3   6     74.79    212.08    112.59 <
      2623    3  -1   5  -4  78411.90  75782.10   2772.80 o
      2623    2  -4  -1   5  78411.90  75782.10   2772.80 o
      2623    1   5   3   6  78411.90  75782.10   2772.80 o
      2624    1   6   3   6     12.64    104.73    125.68 <
      2625    3  -2   5  -7  42058.60  45176.60   1722.86 o
      2625    2  -5  -3   6  42058.60  45176.60   1722.86 o
      2625    1   7   3   6  42058.60  45176.60   1722.86 o
      2626    1   8   3   6     36.51    -75.93    172.81 <
      2627    3  -3   5 -10  15114.60  16563.50    756.70 o
      2627    2  -6  -5   7  15114.60  16563.50    756.70 o
      2627    1   9   3   6  15114.60  16563.50    756.70 o
      2628    1  10   3   6     68.49    128.30    259.21 <
      2629    3  -4   5 -13   5707.76   4631.81    586.51 o
      2629    2  -7  -7   8   5707.76   4631.81    586.51 o
      2629    1  11   3   6   5707.76   4631.81    586.51 o
      2630    1  -8   4   6    453.98    -10.47    345.62 <
      2631    1  -7   4   6    189.45    562.94    280.16 <
      2632    1  -6   4   6    204.44     99.50    272.31 <
      2633    1  -5   4   6    199.64    -81.17    214.70 <
      2634    1  -4   4   6     81.62    -89.02    209.47 <
      2635    1  -3   4   6    325.07    586.51    214.70 <
      2636    1  -2   4   6   1729.32   1631.22    206.85 o
      2637    1  -1   4   6    705.48    617.92    164.95 o
      2638    1   0   4   6    225.84    295.87    141.39 <
      2639    1   1   4   6      1.31     78.55    151.86 <
      2640    1   2   4   6    948.48    945.22    178.05 o
      2641    1   3   4   6     94.09    340.38    138.77 <
      2642    1   4   4   6      5.16   -154.48    120.44 <
      2643    1   5   4   6    589.65    544.61    144.01 o
      2644    1   6   4   6      6.04    314.20    154.48 <
      2645    1   7   4   6     27.41    -52.37    188.52 <
      2646    1   8   4   6   1109.71    869.28    251.36 o
      2647    1   9   4   6    615.87   1002.82    293.25 o
      2648    1  10   4   6    316.75     68.08    274.92 <
      2649    1  11   4   6     79.99    188.52    319.44 <
      2650    1  -7   5   6    124.47   -329.91    350.86 <
      2651    1  -6   5   6    496.45   1212.28    382.27 o
      2652    1  -5   5   6   1990.02   2270.09    382.27 o
      2653    1  -4   5   6    642.61    706.95    295.87 <
      2654    1  -3   5   6    237.94    251.36    212.08 <
      2655    1  -2   5   6   3879.03   4147.42    337.76 o
      2656    1  -1   5   6   1287.21   1269.89    191.14 o
      2657    1   0   5   6    424.92    581.27    157.10 o
      2658    1   1   5   6   2221.56   1882.57    235.65 o
      2659    1   2   5   6    243.92    149.24    136.15 <
      2660    1   3   5   6    163.43    136.15    162.34 <
      2661    1   4   5   6     18.59    149.24    141.39 <
      2662    1   5   5   6   2317.72   2654.98    267.07 o
      2663    1   6   5   6     88.73    544.61    240.89 <
      2664    1   7   5   6    144.29     65.46    253.98 <
      2665    1   8   5   6   2137.72   2311.98    377.04 o
      2666    1   9   5   6     98.48    183.28    306.34 <
      2667    1  10   5   6   1476.57   1987.31    447.73 o
      2668    1  11   5   6    750.58    803.83    576.03 <
      2669    1  -7   6   6    284.63    442.50    371.80 <
      2670    3   3   6  15   8584.63   9768.97    795.97 o
      2670    2   3  12   3   8584.63   9768.97    795.97 o
      2670    1  -6   6   6   8584.63   9768.97    795.97 o
      2671    1  -5   6   6    172.31    411.08    308.96 <
      2672    3   2   6  12   1071.65   1369.38    327.29 o
      2672    2   2  10   4   1071.65   1369.38    327.29 o
      2672    1  -4   6   6   1071.65   1369.38    327.29 o
      2673    1  -3   6   6    251.43    188.52    264.45 <
      2674    3   1   6   9    848.44    625.78    222.56 <
      2674    2   1   8   5    848.44    625.78    222.56 <
      2674    1  -2   6   6    848.44    625.78    222.56 <
      2675    1  -1   6   6     62.84    481.77    183.28 <
      2676    3   0   6   6  55874.10  57828.30   2204.63 o
      2676    2   0   6   6  55874.10  57828.30   2204.63 o
      2676    1   0   6   6  55874.10  57828.30   2204.63 o
      2677    1   1   6   6      1.51    209.47    159.72 <
      2678    3  -1   6   3  31214.90  30422.30   1230.61 o
      2678    2  -1   4   7  31214.90  30422.30   1230.61 o
      2678    1   2   6   6  31214.90  30422.30   1230.61 o
      2679    1   3   6   6      0.99   -157.10    162.34 <
      2680    3  -2   6   0  39551.80  39748.80   1555.28 o
      2680    2  -2   2   8  39551.80  39748.80   1555.28 o
      2680    1   4   6   6  39551.80  39748.80   1555.28 o
      2681    1   5   6   6     26.77    -39.27    175.43 <
      2682    3  -3   6  -3  34545.90  36269.00   1662.64 o
      2682    2  -3   0   9  34545.90  36269.00   1662.64 o
      2682    1   6   6   6  34545.90  36269.00   1662.64 o
      2683    1   7   6   6     15.07    -78.55    243.50 <
      2684    3  -4   6  -6   3872.99   3280.76    476.54 o
      2684    2  -4  -2  10   3872.99   3280.76    476.54 o
      2684    1   8   6   6   3872.99   3280.76    476.54 o
      2685    1   9   6   6     27.12   -442.50    384.89 <
      2686    3  -5   6  -9   4380.50   4414.49    887.61 o
      2686    2  -5  -4  11   4380.50   4414.49    887.61 o
      2686    1  10   6   6   4380.50   4414.49    887.61 o
      2687    1  11   6   6    130.66    -34.04    536.76 <
      2688    1  -6   7   6      9.05    178.05    397.98 <
      2689    1  -5   7   6     89.28    225.18    335.14 <
      2690    1  -4   7   6     89.39    191.14    311.58 <
      2691    1  -3   7   6    199.40    518.43    295.87 <
      2692    1  -2   7   6    277.17    123.06    280.16 <
      2693    1  -1   7   6    460.74    853.57    298.49 <
      2694    1   0   7   6     47.92     41.89    209.47 <
      2695    1   1   7   6    194.40     49.75    198.99 <
      2696    1   2   7   6    274.08    400.60    204.23 <
      2697    1   3   7   6   2121.68   2092.04    322.05 o
      2698    1   4   7   6     93.74   -191.14    214.70 <
      2699    1   5   7   6     15.65    392.75    303.73 <
      2700    1   6   7   6    665.79    586.51    316.82 <
      2701    1   7   7   6    361.29    492.24    411.08 <
      2702    1   8   7   6    397.26    154.48    403.22 <
      2703    1   9   7   6    423.97   1173.01    557.70 <
      2704    1  10   7   6    251.33    997.58    638.87 <
      2705    1  11   7   6    223.79    748.84    565.56 <
      2706    1  -6   8   6    511.52   -704.33    625.78 <
      2707    1  -5   8   6     23.87   -146.63    382.27 <
      2708    1  -4   8   6   1427.79   1641.69    400.60 o
      2709    1  -3   8   6   1265.57   2173.21    421.55 o
      2710    1  -2   8   6    530.19    722.66    327.29 <
      2711    1  -1   8   6   1037.27   1285.60    324.67 o
      2712    1   0   8   6   2541.64   2010.87    369.18 o
      2713    1   1   8   6    114.01    -47.13    219.94 <
      2714    1   2   8   6   1238.86   1044.71    319.44 o
      2715    1   3   8   6      2.95    -10.47    259.21 <
      2716    1   4   8   6   1660.19   1804.03    343.00 o
      2717    1   5   8   6     28.92   -625.78    282.78 <
      2718    1   6   8   6   1576.01   1948.03    447.73 o
      2719    1   7   8   6    781.79   1285.60    583.89 <
      2720    1   8   8   6     14.12   -209.47    455.59 <
      2721    1   9   8   6   1829.47   2047.53    670.29 o
      2722    1  10   8   6   1057.76    476.54    581.27 <
      2723    3   1   7  16    382.28    916.41    439.88 <
      2723    2   4  13   7    382.28    916.41    439.88 <
      2723    1  -5   9   6    382.28    916.41    439.88 <
      2724    1  -4   9   6     66.63    397.98    390.13 <
      2725    3   0   7  13   4635.58   3780.86    526.28 o
      2725    2   3  11   8   4635.58   3780.86    526.28 o
      2725    1  -3   9   6   4635.58   3780.86    526.28 o
      2726    1  -2   9   6     80.64    141.39    295.87 <
      2727    3  -1   7  10   3968.81   4398.78    505.34 o
      2727    2   2   9   9   3968.81   4398.78    505.34 o
      2727    1  -1   9   6   3968.81   4398.78    505.34 o
      2728    1   0   9   6     12.37    353.47    405.84 <
      2729    3  -2   7   7  20395.30  21601.20   1403.42 o
      2729    2   1   7  10  20395.30  21601.20   1403.42 o
      2729    1   1   9   6  20395.30  21601.20   1403.42 o
      2730    1   2   9   6      0.47    361.33    301.11 <
      2731    3  -3   7   4   5436.85   4603.01    589.12 o
      2731    2   0   5  11   5436.85   4603.01    589.12 o
      2731    1   3   9   6   5436.85   4603.01    589.12 o
      2732    1   4   9   6     25.75    274.92    340.38 <
      2733    3  -4   7   1  29201.10  31954.00   1942.80 o
      2733    2  -1   3  12  29201.10  31954.00   1942.80 o
      2733    1   5   9   6  29201.10  31954.00   1942.80 o
      2734    1   6   9   6    221.43   -246.12    356.09 <
      2735    3  -5   7  -2   9814.16   8774.00   1188.72 o
      2735    2  -2   1  13   9814.16   8774.00   1188.72 o
      2735    1   7   9   6   9814.16   8774.00   1188.72 o
      2736    1   8   9   6     99.01    196.37    589.12 <
      2737    3  -6   7  -5   1366.91     70.69    620.54 <
      2737    2  -3  -1  14   1366.91     70.69    620.54 <
      2737    1   9   9   6   1366.91     70.69    620.54 <
      2738    1  10   9   6      6.63   -314.20    560.32 <
      2739    1  -4  10   6      5.13   -198.99    418.93 <
      2740    1  -3  10   6      1.05    102.11    371.80 <
      2741    1  -2  10   6    593.04    850.96    416.31 <
      2742    1  -1  10   6    254.76     36.66    466.06 <
      2743    1   0  10   6     33.14   -843.10    390.13 <
      2744    1   1  10   6     41.82    -86.40    353.47 <
      2745    1   2  10   6    265.01    623.16    547.23 <
      2746    1   3  10   6      3.47   -429.40    463.44 <
      2747    1   4  10   6    487.19    984.49    392.75 <
      2748    1   5  10   6   1023.26   2160.12    502.72 o
      2749    1   6  10   6      5.11    133.54    374.42 <
      2750    1   7  10   6     63.23    565.56    602.21 <
      2751    1   8  10   6    246.39    -18.33    526.28 <
      2752    1   9  10   6    118.43   -992.34    497.48 <
      2753    1  -3  11   6    655.28    442.50    589.12 <
      2754    1  -2  11   6    310.08    214.70    589.12 <
      2755    1  -1  11   6    379.95    319.44    617.92 <
      2756    1   0  11   6     87.88     62.84    531.52 <
      2757    1   1  11   6    739.86    363.95    599.60 <
      2758    1   2  11   6    166.46    209.47    581.27 <
      2759    1   3  11   6   1146.59   1188.72    680.76 <
      2760    1   4  11   6     24.32   -204.23    555.09 <
      2761    1   5  11   6   1750.47   2317.22    573.41 o
      2762    1   6  11   6     90.29   -424.17    379.66 <
      2763    1   7  11   6    299.51   -484.39    418.93 <
      2764    1   8  11   6    838.37    892.85    657.20 <
      2765    1   9  11   6    262.06  -1083.99    562.94 <
      2766    1  -1  12   6     65.66   -159.72    536.76 <
      2767    3  -3   8  11  14376.00  15586.90   1673.11 o
      2767    2   3  10  13  14376.00  15586.90   1673.11 o
      2767    1   0  12   6  14376.00  15586.90   1673.11 o
      2768    1   1  12   6     29.26   -327.29    583.89 <
      2769    3  -4   8   8   8885.53   7438.66   1233.23 o
      2769    2   2   8  14   8885.53   7438.66   1233.23 o
      2769    1   2  12   6   8885.53   7438.66   1233.23 o
      2770    1   3  12   6     51.41   1162.54    654.58 <
      2771    3  -5   8   5   2617.72   2356.49    788.11 <
      2771    2   1   6  15   2617.72   2356.49    788.11 <
      2771    1   4  12   6   2617.72   2356.49    788.11 <
      2772    1   5  12   6      5.62    327.29    636.25 <
      2773    3  -6   8   2   3568.57   3613.29    720.04 o
      2773    2   0   4  16   3568.57   3613.29    720.04 o
      2773    1   6  12   6   3568.57   3613.29    720.04 o
      2774    1   7  12   6    181.75   -596.98    476.54 <
      2775    1   1  13   6      1.95    790.73    722.66 <
      2776    1   2  13   6    240.05   -576.03    657.20 <
      2777    1   3  13   6    375.32    487.01    623.16 <
      2778    1   4  13   6    449.11    445.11    680.76 <
      2779    1   5  13   6     97.33   -238.27    803.83 <
      2780    3  10   1  -5    600.72    552.47    599.60 <
      2780    2  -8  -3 -15    600.72    552.47    599.60 <
      2780    1  -2 -11   7    600.72    552.47    599.60 <
      2781    1  -1 -11   7     50.14   -157.10    513.19 <
      2782    1  -5 -10   7    253.90    541.99    735.75 <
      2783    1  -4 -10   7    132.74   -628.40    565.56 <
      2784    1  -3 -10   7      4.13    379.66    665.05 <
      2785    1  -2 -10   7   1474.49   2089.42    754.08 <
      2786    1  -1 -10   7   1237.77   1531.72    594.36 <
      2787    1   0 -10   7     38.19   1136.35    544.61 <
      2788    1   1 -10   7   1841.61   2662.84    557.70 o
      2789    1   2 -10   7    100.70   -518.43    704.33 <
      2790    1  -6  -9   7    225.05   -646.73    633.63 <
      2791    1  -5  -9   7   1881.00   1675.73    769.79 <
      2792    1  -4  -9   7      8.26     65.46    557.70 <
      2793    1  -3  -9   7    321.62    793.35    638.87 <
      2794    1  -2  -9   7    150.87   -222.56    536.76 <
      2795    1  -1  -9   7    302.07   -170.19    473.92 <
      2796    1   0  -9   7    655.71    413.70    369.18 <
      2797    1   1  -9   7    627.84    974.02    384.89 <
      2798    1   2  -9   7     60.11    -99.50    311.58 <
      2799    1   3  -9   7     13.48    324.67    654.58 <
      2800    1   4  -9   7      6.40     81.17    356.09 <
      2801    3  11   2   5  12993.00  16189.10   1461.02 o
      2801    2  -4   4 -14  12993.00  16189.10   1461.02 o
      2801    1  -7  -8   7  12993.00  16189.10   1461.02 o
      2802    1  -6  -8   7    123.53   -421.55    432.02 <
      2803    3  10   2   2   8409.16   7653.36   1282.98 o
      2803    2  -5   2 -13   8409.16   7653.36   1282.98 o
      2803    1  -5  -8   7   8409.16   7653.36   1282.98 o
      2804    1  -4  -8   7    111.18   -259.21    544.61 <
      2805    3   9   2  -1   5382.40   6208.05   1099.70 o
      2805    2  -6   0 -12   5382.40   6208.05   1099.70 o
      2805    1  -3  -8   7   5382.40   6208.05   1099.70 o
      2806    1  -2  -8   7      3.43   -403.22    447.73 <
      2807    3   8   2  -4   5911.45   7344.40    764.55 o
      2807    2  -7  -2 -11   5911.45   7344.40    764.55 o
      2807    1  -1  -8   7   5911.45   7344.40    764.55 o
      2808    1   0  -8   7      1.15      5.24    329.91 <
      2809    3   7   2  -7   8838.01  10808.40    877.14 o
      2809    2  -8  -4 -10   8838.01  10808.40    877.14 o
      2809    1   1  -8   7   8838.01  10808.40    877.14 o
      2810    1   2  -8   7     85.65    280.16    329.91 <
      2811    3   6   2 -10  27535.60  29513.70   1683.58 o
      2811    2  -9  -6  -9  27535.60  29513.70   1683.58 o
      2811    1   3  -8   7  27535.60  29513.70   1683.58 o
      2812    1   4  -8   7    301.29    322.05    343.00 <
      2813    3   5   2 -13  12290.80  12431.80    835.24 o
      2813    2 -10  -8  -8  12290.80  12431.80    835.24 o
      2813    1   5  -8   7  12290.80  12431.80    835.24 o
      2814    1  -8  -7   7    121.30   -735.75    623.16 <
      2815    1  -7  -7   7   1506.01   2298.89    853.57 <
      2816    1  -6  -7   7    212.49    306.34    466.06 <
      2817    1  -5  -7   7    349.74    811.68    424.17 <
      2818    1  -4  -7   7      6.62    178.05    549.85 <
      2819    1  -3  -7   7   1114.62   1254.18    623.16 <
      2820    1  -2  -7   7    344.44   -421.55    468.68 <
      2821    1  -1  -7   7   1100.92   1733.33    421.55 o
      2822    1   0  -7   7    843.25   1091.84    371.80 <
      2823    1   1  -7   7     48.24    452.97    238.27 <
      2824    1   2  -7   7    367.47    500.10    238.27 <
      2825    1   3  -7   7     17.06    178.05    274.92 <
      2826    1   4  -7   7     31.22     57.60    264.45 <
      2827    1   5  -7   7    268.19      7.85    277.54 <
      2828    1   6  -7   7    509.53    638.87    274.92 <
      2829    1  -8  -6   7    543.43   1000.20    604.83 <
      2830    1  -7  -6   7     32.42    356.09    686.00 <
      2831    1  -6  -6   7   1368.68    942.60    471.30 <
      2832    1  -5  -6   7    118.93   -397.98    358.71 <
      2833    1  -4  -6   7   3929.05   6003.82    733.13 o
      2834    1  -3  -6   7     32.04    120.44    293.25 <
      2835    1  -2  -6   7    389.47   1230.61    557.70 <
      2836    1  -1  -6   7    245.47    301.11    290.63 <
      2837    1   0  -6   7     88.13     99.50    206.85 <
      2838    1   1  -6   7    326.11    136.15    196.37 <
      2839    1   2  -6   7    735.12    858.81    219.94 o
      2840    1   3  -6   7     26.97   -133.54    217.32 <
      2841    1   4  -6   7    530.19    775.02    253.98 o
      2842    1   5  -6   7    257.93    442.50    235.65 <
      2843    1   6  -6   7    107.01    290.63    201.61 <
      2844    3  10   3   9  21578.80  25282.50   2385.29 o
      2844    2  -2   7 -11  21578.80  25282.50   2385.29 o
      2844    1  -8  -5   7  21578.80  25282.50   2385.29 o
      2845    1  -7  -5   7     81.43    515.81    570.79 <
      2846    3   9   3   6  19158.30  17438.00   1238.47 o
      2846    2  -3   5 -10  19158.30  17438.00   1238.47 o
      2846    1  -6  -5   7  19158.30  17438.00   1238.47 o
      2847    1  -5  -5   7     19.77    623.16    384.89 <
      2848    3   8   3   3   6121.29   6975.21    764.55 o
      2848    2  -4   3  -9   6121.29   6975.21    764.55 o
      2848    1  -4  -5   7   6121.29   6975.21    764.55 o
      2849    1  -3  -5   7    161.08    233.03    314.20 <
      2850    3   7   3   0   5935.20   9674.71    861.43 o
      2850    2  -5   1  -8   5935.20   9674.71    861.43 o
      2850    1  -2  -5   7   5935.20   9674.71    861.43 o
      2851    1  -1  -5   7     12.41     60.22    240.89 <
      2852    3   6   3  -3   6150.57   7454.37    518.43 o
      2852    2  -6  -1  -7   6150.57   7454.37    518.43 o
      2852    1   0  -5   7   6150.57   7454.37    518.43 o
      2853    1   1  -5   7      0.11     -2.62    164.95 <
      2854    3   5   3  -6  43702.90  42285.90   1819.73 o
      2854    2  -7  -3  -6  43702.90  42285.90   1819.73 o
      2854    1   2  -5   7  43702.90  42285.90   1819.73 o
      2855    1   3  -5   7    475.64    411.08    204.23 <
      2856    3   4   3  -9  41420.40  40172.90   2073.71 o
      2856    2  -8  -5  -5  41420.40  40172.90   2073.71 o
      2856    1   4  -5   7  41420.40  40172.90   2073.71 o
      2857    1   5  -5   7      4.80      5.24    178.05 <
      2858    3   3   3 -12   5424.90   6582.47    932.12 o
      2858    2  -9  -7  -4   5424.90   6582.47    932.12 o
      2858    1   6  -5   7   5424.90   6582.47    932.12 o
      2859    1   7  -5   7      1.55   -340.38    411.08 <
      2860    1  -9  -4   7      3.49   -539.38    426.79 <
      2861    1  -8  -4   7    291.85     10.47    361.33 <
      2862    1  -7  -4   7    201.99   -123.06    353.47 <
      2863    1  -6  -4   7   1152.07   1615.51    356.09 o
      2864    1  -5  -4   7    415.72    953.07    382.27 <
      2865    1  -4  -4   7    562.65    623.16    322.05 <
      2866    1  -3  -4   7      3.94    206.85    261.83 <
      2867    1  -2  -4   7   1728.73   2492.64    322.05 o
      2868    1  -1  -4   7    671.82    837.86    196.37 o
      2869    1   0  -4   7     98.45    198.99    125.68 <
      2870    1   1  -4   7    404.52    754.08    180.66 o
      2871    1   2  -4   7     12.41    117.82    123.06 <
      2872    1   3  -4   7     12.58     47.13    104.73 <
      2873    1   4  -4   7    358.22    442.50    175.43 <
      2874    1   5  -4   7     36.00     91.64    146.63 <
      2875    1   6  -4   7   1098.54    633.63    447.73 <
      2876    1   7  -4   7    888.95    678.15    442.50 <
      2877    1   8  -4   7    268.89    -13.09    463.44 <
      2878    1  -9  -3   7   1470.75   1264.65    510.57 <
      2879    1  -8  -3   7    241.48    494.86    392.75 <
      2880    1  -7  -3   7    593.45    445.11    358.71 <
      2881    1  -6  -3   7     25.04    123.06    322.05 <
      2882    1  -5  -3   7   6362.19   7480.55    602.21 o
      2883    1  -4  -3   7    224.57    494.86    222.56 <
      2884    1  -3  -3   7   1353.27   2298.89    408.46 o
      2885    1  -2  -3   7    418.61    576.03    214.70 <
      2886    1  -1  -3   7   1234.16   2052.77    233.03 o
      2887    1   0  -3   7    246.40    209.47    144.01 <
      2888    1   1  -3   7   2971.73   4011.27    269.69 o
      2889    1   2  -3   7    410.68    371.80    123.06 o
      2890    1   3  -3   7      2.42     73.31     99.50 <
      2891    1   4  -3   7      3.91   -138.77    115.21 <
      2892    1   5  -3   7   1607.74   1471.50    183.28 o
      2893    1   6  -3   7    259.39   1413.89    413.70 o
      2894    1   7  -3   7     22.33    801.21    363.95 <
      2895    1   8  -3   7     45.37   -104.73    379.66 <
      2896    1   9  -3   7    565.58    662.44    526.28 <
      2897    3   9   4  13  10296.70  10808.40   1047.33 o
      2897    2   0  10  -8  10296.70  10808.40   1047.33 o
      2897    1  -9  -2   7  10296.70  10808.40   1047.33 o
      2898    1  -8  -2   7     23.33   -259.21    363.95 <
      2899    3   8   4  10   9639.30  10612.10    955.69 o
      2899    2  -1   8  -7   9639.30  10612.10    955.69 o
      2899    1  -7  -2   7   9639.30  10612.10    955.69 o
      2900    1  -6  -2   7    429.53    523.66    306.34 <
      2901    3   7   4   7   6197.81   6111.17    526.28 o
      2901    2  -2   6  -6   6197.81   6111.17    526.28 o
      2901    1  -5  -2   7   6197.81   6111.17    526.28 o
      2902    1  -4  -2   7      0.53    -68.08    188.52 <
      2903    3   6   4   4  22158.10  22894.60   1107.55 o
      2903    2  -3   4  -5  22158.10  22894.60   1107.55 o
      2903    1  -3  -2   7  22158.10  22894.60   1107.55 o
      2904    1  -2  -2   7     25.06   -102.11    178.05 <
      2905    3   5   4   1  14601.60  14756.90    636.25 o
      2905    2  -4   2  -4  14601.60  14756.90    636.25 o
      2905    1  -1  -2   7  14601.60  14756.90    636.25 o
      2906    1   0  -2   7      5.13    201.61    117.82 <
      2907    3   4   4  -2  42713.00  41078.90   1529.10 o
      2907    2  -5   0  -3  42713.00  41078.90   1529.10 o
      2907    1   1  -2   7  42713.00  41078.90   1529.10 o
      2908    1   2  -2   7     53.96     31.42    104.73 <
      2909    3   3   4  -5 205237.00 186328.00   5951.45 o
      2909    2  -6  -2  -2 205237.00 186328.00   5951.45 o
      2909    1   3  -2   7 205237.00 186328.00   5951.45 o
      2910    1   4  -2   7    344.24     60.22    144.01 <
      2911    3   2   4  -8  30148.10  29631.60   1162.54 o
      2911    2  -7  -4  -1  30148.10  29631.60   1162.54 o
      2911    1   5  -2   7  30148.10  29631.60   1162.54 o
      2912    1   6  -2   7    199.88    170.19    290.63 <
      2913    3   1   4 -11   4298.19   4424.97    591.74 o
      2913    2  -8  -6   0   4298.19   4424.97    591.74 o
      2913    1   7  -2   7   4298.19   4424.97    591.74 o
      2914    1   8  -2   7     85.54   -295.87    366.57 <
      2915    3   0   4 -14   3347.00   2728.29    599.60 o
      2915    2  -9  -8   1   3347.00   2728.29    599.60 o
      2915    1   9  -2   7   3347.00   2728.29    599.60 o
      2916    1  10  -2   7     50.07     99.50    280.16 <
      2917    1  -9  -1   7     27.97    777.64    625.78 <
      2918    1  -8  -1   7     65.53    -10.47    374.42 <
      2919    1  -7  -1   7    591.43    720.04    343.00 <
      2920    1  -6  -1   7      4.03   -259.21    235.65 <
      2921    1  -5  -1   7   1687.70   1353.67    290.63 o
      2922    1  -4  -1   7    444.88    196.37    178.05 <
      2923    1  -3  -1   7    849.55   1055.18    185.90 o
      2924    1  -2  -1   7     22.74     83.79    109.97 <
      2925    1  -1  -1   7    362.13    638.87    178.05 o
      2926    1   0  -1   7     18.76     70.69    104.73 <
      2927    1   1  -1   7      7.68    -13.09     94.26 <
      2928    1   2  -1   7     12.42    172.81     99.50 <
      2929    1   3  -1   7    198.85    363.95     94.26 o
      2930    1   4  -1   7   1103.60    871.90    104.73 o
      2931    1   5  -1   7      2.51   -117.82    141.39 <
      2932    1   6  -1   7     75.55   -201.61    149.24 <
      2933    1   7  -1   7    958.84   1078.75    225.18 o
      2934    1   8  -1   7    823.95    790.73    246.12 o
      2935    1   9  -1   7    272.67    149.24    230.41 <
      2936    1  10  -1   7    115.56    217.32    285.40 <
      2937    1  -9   0   7    147.18    -13.09    439.88 <
      2938    1  -8   0   7   1421.39    699.09    644.11 <
      2939    1  -7   0   7    415.41    164.95    316.82 <
      2940    1  -6   0   7   1529.94    968.78    350.86 <
      2941    1  -5   0   7     88.82    -47.13    196.37 <
      2942    1  -4   0   7   5937.95   6210.66    479.15 o
      2943    1  -3   0   7   2201.83   2450.75    246.12 o
      2944    1  -2   0   7    267.11    510.57    154.48 o
      2945    1  -1   0   7     70.71    343.00    128.30 <
      2946    1   0   0   7    204.75     52.37    120.44 <
      2947    1   1   0   7     27.21      5.24    117.82 <
      2948    1   2   0   7   4594.28   4451.15    235.65 o
      2949    1   3   0   7   1803.92   1413.89    130.92 o
      2950    1   4   0   7   1567.58   1497.68    133.54 o
      2951    1   5   0   7     86.57    272.31    102.11 <
      2952    1   6   0   7   1815.80   1743.80    212.08 o
      2953    1   7   0   7     25.26     83.79    185.90 <
      2954    1   8   0   7    196.52    154.48    217.32 <
      2955    1   9   0   7    153.40   -170.19    240.89 <
      2956    1  10   0   7   1114.32   1510.77    340.38 o
      2957    1  -9   1   7     29.44   -581.27    392.75 <
      2958    3   7   5  14  11403.60  12026.00   1047.33 o
      2958    2   1  11  -4  11403.60  12026.00   1047.33 o
      2958    1  -8   1   7  11403.60  12026.00   1047.33 o
      2959    1  -7   1   7    335.47    395.37    356.09 <
      2960    3   6   5  11   1972.57   1531.72    319.44 o
      2960    2   0   9  -3   1972.57   1531.72    319.44 o
      2960    1  -6   1   7   1972.57   1531.72    319.44 o
      2961    1  -5   1   7    264.94    -20.95    246.12 <
      2962    3   5   5   8   5000.35   5265.45    439.88 o
      2962    2  -1   7  -2   5000.35   5265.45    439.88 o
      2962    1  -4   1   7   5000.35   5265.45    439.88 o
      2963    1  -3   1   7      1.72   -172.81    175.43 <
      2964    3   4   5   5  46899.00  51743.30   2225.58 o
      2964    2  -2   5  -1  46899.00  51743.30   2225.58 o
      2964    1  -2   1   7  46899.00  51743.30   2225.58 o
      2965    1  -1   1   7     81.62    172.81    130.92 <
      2966    3   3   5   2   1680.03   1903.52    227.79 o
      2966    2  -3   3   0   1680.03   1903.52    227.79 o
      2966    1   0   1   7   1680.03   1903.52    227.79 o
      2967    1   1   1   7      0.11    -89.02    107.35 <
      2968    3   2   5  -1  82334.70  73650.80   2445.51 o
      2968    2  -4   1   1  82334.70  73650.80   2445.51 o
      2968    1   2   1   7  82334.70  73650.80   2445.51 o
      2969    1   3   1   7    261.57    112.59    102.11 <
      2970    3   1   5  -4 109797.00 107362.00   3207.45 o
      2970    2  -5  -1   2 109797.00 107362.00   3207.45 o
      2970    1   4   1   7 109797.00 107362.00   3207.45 o
      2971    1   5   1   7     18.25    136.15     99.50 <
      2972    3   0   5  -7   4956.80   6126.88    293.25 o
      2972    2  -6  -3   3   4956.80   6126.88    293.25 o
      2972    1   6   1   7   4956.80   6126.88    293.25 o
      2973    1   7   1   7    226.33    290.63    193.76 <
      2974    3  -1   5 -10   8646.63   8849.93    536.76 o
      2974    2  -7  -5   4   8646.63   8849.93    536.76 o
      2974    1   8   1   7   8646.63   8849.93    536.76 o
      2975    1   9   1   7     63.62    290.63    256.60 <
      2976    3  -2   5 -13   2090.38   1568.38    314.20 o
      2976    2  -8  -7   5   2090.38   1568.38    314.20 o
      2976    1  10   1   7   2090.38   1568.38    314.20 o
      2977    1  -8   2   7     93.91    157.10    366.57 <
      2978    1  -7   2   7     43.37     60.22    282.78 <
      2979    1  -6   2   7    417.34    445.11    222.56 <
      2980    1  -5   2   7    856.72    672.91    188.52 o
      2981    1  -4   2   7   1695.36   1227.99    206.85 o
      2982    1  -3   2   7     50.00    154.48    136.15 <
      2983    1  -2   2   7     70.89     86.40    146.63 <
      2984    1  -1   2   7    374.42    510.57    170.19 <
      2985    1   0   2   7    216.77    282.78    133.54 <
      2986    1   1   2   7    498.33    400.60    133.54 o
      2987    1   2   2   7    608.34    534.14    120.44 o
      2988    1   3   2   7    213.93     54.98    123.06 <
      2989    1   4   2   7    146.09    206.85    130.92 <
      2990    1   5   2   7   1414.93    929.51    123.06 o
      2991    1   6   2   7    953.25   1097.08    180.66 o
      2992    1   7   2   7    381.09    596.98    167.57 o
      2993    1   8   2   7     80.62    384.89    178.05 <
      2994    1   9   2   7    114.42   -311.58    225.18 <
      2995    1  10   2   7    402.46    492.24    306.34 <
      2996    1  11   2   7    185.11    306.34    384.89 <
      2997    1  -8   3   7    837.31    217.32    439.88 <
      2998    1  -7   3   7   1447.11   1929.70    374.42 o
      2999    1  -6   3   7    451.44    -70.69    230.41 <
      3000    1  -5   3   7   3816.68   3995.56    371.80 o
      3001    1  -4   3   7   1016.27    754.08    212.08 o
      3002    1  -3   3   7    513.37    219.94    175.43 <
      3003    1  -2   3   7   4577.21   4548.03    324.67 o
      3004    1  -1   3   7    613.24    466.06    157.10 <
      3005    1   0   3   7     25.36    -28.80    167.57 <
      3006    1   1   3   7   3167.81   3296.47    301.11 o
      3007    1   2   3   7   1660.99   1877.34    191.14 o
      3008    1   3   3   7    437.92    665.05    141.39 o
      3009    1   4   3   7    612.35    803.83    146.63 o
      3010    1   5   3   7   2261.53   2123.46    191.14 o
      3011    1   6   3   7      0.36     18.33    141.39 <
      3012    1   7   3   7    669.61    492.24    167.57 <
      3013    1   8   3   7    656.26   1196.57    227.79 o
      3014    1   9   3   7    793.16   1259.41    259.21 o
      3015    1  10   3   7     29.58     10.47    269.69 <
      3016    1  11   3   7    746.31    515.81    418.93 <
      3017    1  -8   4   7     92.05    589.12    497.48 <
      3018    3   5   6  15   1638.76   1421.75    332.53 o
      3018    2   2  12   0   1638.76   1421.75    332.53 o
      3018    1  -7   4   7   1638.76   1421.75    332.53 o
      3019    1  -6   4   7    233.21    -57.60    361.33 <
      3020    3   4   6  12    320.51    130.92    285.40 <
      3020    2   1  10   1    320.51    130.92    285.40 <
      3020    1  -5   4   7    320.51    130.92    285.40 <
      3021    1  -4   4   7    214.95    429.40    259.21 <
      3022    3   3   6   9  17265.80  18917.40    971.40 o
      3022    2   0   8   2  17265.80  18917.40    971.40 o
      3022    1  -3   4   7  17265.80  18917.40    971.40 o
      3023    1  -2   4   7     65.37    -65.46    164.95 <
      3024    3   2   6   6  30705.20  30880.50   1102.31 o
      3024    2  -1   6   3  30705.20  30880.50   1102.31 o
      3024    1  -1   4   7  30705.20  30880.50   1102.31 o
      3025    1   0   4   7    136.12    -47.13    164.95 <
      3026    3   1   6   3  43508.80  44825.70   1531.72 o
      3026    2  -2   4   4  43508.80  44825.70   1531.72 o
      3026    1   1   4   7  43508.80  44825.70   1531.72 o
      3027    1   2   4   7     24.62   -107.35    151.86 <
      3028    3   0   6   0 168781.00 158862.00   5152.86 o
      3028    2  -3   2   5 168781.00 158862.00   5152.86 o
      3028    1   3   4   7 168781.00 158862.00   5152.86 o
      3029    1   4   4   7     28.52    -20.95    128.30 <
      3030    3  -1   6  -3  11741.50  12814.10    521.05 o
      3030    2  -4   0   6  11741.50  12814.10    521.05 o
      3030    1   5   4   7  11741.50  12814.10    521.05 o
      3031    1   6   4   7     85.22   -120.44    149.24 <
      3032    3  -2   6  -6   4326.52   4398.78    392.75 o
      3032    2  -5  -2   7   4326.52   4398.78    392.75 o
      3032    1   7   4   7   4326.52   4398.78    392.75 o
      3033    1   8   4   7    116.82    157.10    248.74 <
      3034    3  -3   6  -9   5157.13   5129.30    557.70 o
      3034    2  -6  -4   8   5157.13   5129.30    557.70 o
      3034    1   9   4   7   5157.13   5129.30    557.70 o
      3035    1  10   4   7     31.01   -416.31    280.16 <
      3036    3  -4   6 -12   1877.23   2230.81    382.27 o
      3036    2  -7  -6   9   1877.23   2230.81    382.27 o
      3036    1  11   4   7   1877.23   2230.81    382.27 o
      3037    1  -7   5   7      4.65    282.78    314.20 <
      3038    1  -6   5   7     97.03    256.60    363.95 <
      3039    1  -5   5   7   1011.58    814.30    335.14 <
      3040    1  -4   5   7    327.20    162.34    269.69 <
      3041    1  -3   5   7    165.30   -144.01    251.36 <
      3042    1  -2   5   7    140.43    343.00    256.60 <
      3043    1  -1   5   7     63.82     65.46    175.43 <
      3044    1   0   5   7    437.04    340.38    162.34 <
      3045    1   1   5   7    365.15    157.10    191.14 <
      3046    1   2   5   7    189.93    272.31    157.10 <
      3047    1   3   5   7    713.78   1277.74    219.94 o
      3048    1   4   5   7    722.72    631.02    159.72 o
      3049    1   5   5   7     53.17    162.34    172.81 <
      3050    1   6   5   7    802.92    361.33    217.32 <
      3051    1   7   5   7   1083.09   1264.65    316.82 o
      3052    1   8   5   7     95.60    141.39    274.92 <
      3053    1   9   5   7    163.02   -149.24    303.73 <
      3054    1  10   5   7    200.95    780.26    397.98 <
      3055    1  11   5   7    733.13   1597.18    450.35 o
      3056    1  -7   6   7   1119.16    633.63    434.64 <
      3057    1  -6   6   7   1171.58    958.31    429.40 <
      3058    1  -5   6   7    109.66    201.61    335.14 <
      3059    1  -4   6   7   1941.89   1269.89    345.62 o
      3060    1  -3   6   7   2039.83   2272.71    358.71 o
      3061    1  -2   6   7     79.68    149.24    277.54 <
      3062    1  -1   6   7   1503.18   2149.64    295.87 o
      3063    1   0   6   7    275.96    324.67    201.61 <
      3064    1   1   6   7    609.19    968.78    233.03 o
      3065    1   2   6   7   1783.05   1235.85    240.89 o
      3066    1   3   6   7   3668.27   3833.23    405.84 o
      3067    1   4   6   7    393.54    343.00    193.76 <
      3068    1   5   6   7    238.84    115.21    188.52 <
      3069    1   6   6   7   1444.76   1390.33    285.40 o
      3070    1   7   6   7   1037.38   1073.51    337.76 o
      3071    1   8   6   7    249.42    198.99    308.96 <
      3072    1   9   6   7    434.38    911.18    510.57 <
      3073    1  10   6   7    523.07    979.25    552.47 <
      3074    1  11   6   7    216.79     89.02    526.28 <
      3075    3   3   7  16    173.00    387.51    400.60 <
      3075    2   3  13   4    173.00    387.51    400.60 <
      3075    1  -6   7   7    173.00    387.51    400.60 <
      3076    1  -5   7   7    155.70    835.24    413.70 <
      3077    3   2   7  13   2848.35   4322.85    502.72 o
      3077    2   2  11   5   2848.35   4322.85    502.72 o
      3077    1  -4   7   7   2848.35   4322.85    502.72 o
      3078    1  -3   7   7     96.80     78.55    319.44 <
      3079    3   1   7  10  20135.20  21810.60   1112.79 o
      3079    2   1   9   6  20135.20  21810.60   1112.79 o
      3079    1  -2   7   7  20135.20  21810.60   1112.79 o
      3080    1  -1   7   7     39.92   -256.60    267.07 <
      3081    3   0   7   7    470.77    356.09    246.12 <
      3081    2   0   7   7    470.77    356.09    246.12 <
      3081    1   0   7   7    470.77    356.09    246.12 <
      3082    1   1   7   7    184.88   -424.17    196.37 <
      3083    3  -1   7   4  44644.00  45158.20   2081.57 o
      3083    2  -1   5   8  44644.00  45158.20   2081.57 o
      3083    1   2   7   7  44644.00  45158.20   2081.57 o
      3084    1   3   7   7      0.46    167.57    248.74 <
      3085    3  -2   7   1  32470.80  33027.50   1576.23 o
      3085    2  -2   3   9  32470.80  33027.50   1576.23 o
      3085    1   4   7   7  32470.80  33027.50   1576.23 o
      3086    1   5   7   7     26.63    -20.95    256.60 <
      3087    3  -3   7  -2    724.74    560.32    324.67 <
      3087    2  -3   1  10    724.74    560.32    324.67 <
      3087    1   6   7   7    724.74    560.32    324.67 <
      3088    1   7   7   7     38.26    206.85    452.97 <
      3089    3  -4   7  -5   4730.71   3969.38    803.83 o
      3089    2  -4  -1  11   4730.71   3969.38    803.83 o
      3089    1   8   7   7   4730.71   3969.38    803.83 o
      3090    1   9   7   7    347.91    623.16    439.88 <
      3091    3  -5   7  -8   4904.45   4469.48    942.60 o
      3091    2  -5  -3  12   4904.45   4469.48    942.60 o
      3091    1  10   7   7   4904.45   4469.48    942.60 o
      3092    1  11   7   7    189.01    314.20    576.03 <
      3093    1  -5   8   7    448.87    301.11    411.08 <
      3094    1  -4   8   7    746.61   1214.90    442.50 <
      3095    1  -3   8   7     82.00    -28.80    337.76 <
      3096    1  -2   8   7    206.32    505.34    327.29 <
      3097    1  -1   8   7    132.73    246.12    303.73 <
      3098    1   0   8   7      5.99    102.11    308.96 <
      3099    1   1   8   7    960.55    581.27    288.02 <
      3100    1   2   8   7    514.41    125.68    293.25 <
      3101    1   3   8   7    176.46    356.09    288.02 <
      3102    1   4   8   7     18.93   -230.41    272.31 <
      3103    1   5   8   7    620.89    748.84    293.25 <
      3104    1   6   8   7    158.35    -68.08    324.67 <
      3105    1   7   8   7     16.47    172.81    437.26 <
      3106    1   8   8   7     13.21   -201.61    513.19 <
      3107    1   9   8   7      0.80    117.82    497.48 <
      3108    1  10   8   7    429.19    172.81    576.03 <
      3109    1  -4   9   7    415.50    421.55    421.55 <
      3110    1  -3   9   7     53.94    112.59    345.62 <
      3111    1  -2   9   7   1755.47   1319.64    541.99 <
      3112    1  -1   9   7     10.51   -212.08    403.22 <
      3113    1   0   9   7    506.78    251.36    463.44 <
      3114    1   1   9   7    567.66    316.82    405.84 <
      3115    1   2   9   7   1301.10   1361.53    361.33 o
      3116    1   3   9   7    117.23    515.81    282.78 <
      3117    1   4   9   7    814.20    754.08    329.91 <
      3118    1   5   9   7    625.89     70.69    371.80 <
      3119    1   6   9   7    397.29    335.14    395.37 <
      3120    1   7   9   7    662.16    905.94    586.51 <
      3121    1   8   9   7   1474.04   2584.29    748.84 o
      3122    1   9   9   7     43.73    612.69    594.36 <
      3123    1  10   9   7      2.69     81.17    604.83 <
      3124    3   0   8  14  10847.60   9347.42   1180.86 o
      3124    2   3  12   9  10847.60   9347.42   1180.86 o
      3124    1  -3  10   7  10847.60   9347.42   1180.86 o
      3125    1  -2  10   7     76.65   -120.44    460.83 <
      3126    3  -1   8  11   8665.22   9203.41   1209.67 o
      3126    2   2  10  10   8665.22   9203.41   1209.67 o
      3126    1  -1  10   7   8665.22   9203.41   1209.67 o
      3127    1   0  10   7     95.35   -761.93    442.50 <
      3128    3  -2   8   8   1395.91    353.47    505.34 <
      3128    2   1   8  11   1395.91    353.47    505.34 <
      3128    1   1  10   7   1395.91    353.47    505.34 <
      3129    1   2  10   7     73.68    686.00    432.02 <
      3130    3  -3   8   5  23254.00  20878.50   1976.83 o
      3130    2   0   6  12  23254.00  20878.50   1976.83 o
      3130    1   3  10   7  23254.00  20878.50   1976.83 o
      3131    1   4  10   7     23.64    230.41    356.09 <
      3132    3  -4   8   2   1395.16   1720.24    489.63 o
      3132    2  -1   4  13   1395.16   1720.24    489.63 o
      3132    1   5  10   7   1395.16   1720.24    489.63 o
      3133    1   6  10   7      0.03    -73.31    358.71 <
      3134    3  -5   8  -1     76.14   -167.57    518.43 <
      3134    2  -2   2  14     76.14   -167.57    518.43 <
      3134    1   7  10   7     76.14   -167.57    518.43 <
      3135    1   8  10   7    101.00    178.05    544.61 <
      3136    3  -6   8  -4   1764.66   1489.83    814.30 <
      3136    2  -3   0  15   1764.66   1489.83    814.30 <
      3136    1   9  10   7   1764.66   1489.83    814.30 <
      3137    1  -2  11   7     70.06   -128.30    568.18 <
      3138    1  -1  11   7    254.77    921.65    612.69 <
      3139    1   0  11   7     40.93    107.35    541.99 <
      3140    1   1  11   7    143.99    361.33    518.43 <
      3141    1   2  11   7     89.57   -371.80    481.77 <
      3142    1   3  11   7    164.27    570.79    591.74 <
      3143    1   4  11   7    157.18    562.94    623.16 <
      3144    1   5  11   7    426.97    123.06    437.26 <
      3145    1   6  11   7    616.28    316.82    452.97 <
      3146    1   7  11   7     14.59   -649.34    523.66 <
      3147    1   8  11   7      2.45    311.58    680.76 <
      3148    1  -1  12   7    613.67    552.47    665.05 <
      3149    1   0  12   7    229.63    573.41    599.60 <
      3150    1   1  12   7    840.47    424.17    649.34 <
      3151    1   2  12   7     82.27   -397.98    589.12 <
      3152    1   3  12   7   1126.90    285.40    746.22 <
      3153    1   4  12   7      5.52   -463.44    560.32 <
      3154    1   5  12   7    400.55    225.18    628.40 <
      3155    1   6  12   7    306.36     23.56    460.83 <
      3156    1   7  12   7    947.73    332.53    688.62 <
      3157    3  -4   9   9    889.96     44.51    751.46 <
      3157    2   2   9  15    889.96     44.51    751.46 <
      3157    1   2  13   7    889.96     44.51    751.46 <
      3158    1   3  13   7     14.27    -13.09    578.65 <
      3159    3  -5   9   6    353.32    947.83    712.18 <
      3159    2   1   7  16    353.32    947.83    712.18 <
      3159    1   4  13   7    353.32    947.83    712.18 <
      3160    1   5  13   7      8.94   -329.91    646.73 <
      3161    3  11   2  -1   2041.61   1597.18    717.42 <
      3161    2  -7   0 -15   2041.61   1597.18    717.42 <
      3161    1  -4 -10   8   2041.61   1597.18    717.42 <
      3162    1  -3 -10   8     18.45    -83.79    562.94 <
      3163    3  10   2  -4   6154.42   5584.88   1060.42 o
      3163    2  -8  -2 -14   6154.42   5584.88   1060.42 o
      3163    1  -2 -10   8   6154.42   5584.88   1060.42 o
      3164    1  -1 -10   8      0.98   -526.28    500.10 <
      3165    3   9   2  -7   9398.56   9431.20   1230.61 o
      3165    2  -9  -4 -13   9398.56   9431.20   1230.61 o
      3165    1   0 -10   8   9398.56   9431.20   1230.61 o
      3166    1   1 -10   8     56.18    418.93    450.35 <
      3167    1  -5  -9   8    431.99    183.28    638.87 <
      3168    1  -4  -9   8   2921.99   5270.69   1107.55 o
      3169    1  -3  -9   8   1494.06   2126.08    743.60 <
      3170    1  -2  -9   8     39.36   -911.18    473.92 <
      3171    1  -1  -9   8    304.35     18.33    576.03 <
      3172    1   0  -9   8    188.69   -206.85    531.52 <
      3173    1   1  -9   8    342.65    366.57    395.37 <
      3174    1   2  -9   8    102.78     68.08    377.04 <
      3175    1   3  -9   8    614.56    102.11    659.82 <
      3176    1  -6  -8   8      4.71   -225.18    691.24 <
      3177    1  -5  -8   8     10.71    418.93    727.89 <
      3178    1  -4  -8   8     23.54   1008.05    764.55 <
      3179    1  -3  -8   8    288.58   -282.78    515.81 <
      3180    1  -2  -8   8     31.57    138.77    552.47 <
      3181    1  -1  -8   8   1438.32   2003.02    644.11 o
      3182    1   0  -8   8     17.27    193.76    366.57 <
      3183    1   1  -8   8    645.77    450.35    392.75 <
      3184    1   2  -8   8    382.86    337.76    363.95 <
      3185    1   3  -8   8     11.02    290.63    607.45 <
      3186    1   4  -8   8    453.86   -282.78    374.42 <
      3187    1   5  -8   8      8.28    -94.26    358.71 <
      3188    3  11   3   6   6889.99   8213.68   1413.89 o
      3188    2  -4   5 -13   6889.99   8213.68   1413.89 o
      3188    1  -7  -7   8   6889.99   8213.68   1413.89 o
      3189    1  -6  -7   8    213.32    390.13    460.83 <
      3190    3  10   3   3   6353.82   7776.42   1290.83 o
      3190    2  -5   3 -12   6353.82   7776.42   1290.83 o
      3190    1  -5  -7   8   6353.82   7776.42   1290.83 o
      3191    1  -4  -7   8     38.89   -219.94    518.43 <
      3192    3   9   3   0  17625.00  15744.00   1594.56 o
      3192    2  -6   1 -11  17625.00  15744.00   1594.56 o
      3192    1  -3  -7   8  17625.00  15744.00   1594.56 o
      3193    1  -2  -7   8      0.24   -149.24    476.54 <
      3194    3   8   3  -3  28774.80  33226.50   1953.27 o
      3194    2  -7  -1 -10  28774.80  33226.50   1953.27 o
      3194    1  -1  -7   8  28774.80  33226.50   1953.27 o
      3195    1   0  -7   8     20.58   -128.30    308.96 <
      3196    3   7   3  -6  21042.40  20250.10   1243.70 o
      3196    2  -8  -3  -9  21042.40  20250.10   1243.70 o
      3196    1   1  -7   8  21042.40  20250.10   1243.70 o
      3197    1   2  -7   8      1.20    -39.27    243.50 <
      3198    3   6   3  -9   8741.94   9986.29    798.59 o
      3198    2  -9  -5  -8   8741.94   9986.29    798.59 o
      3198    1   3  -7   8   8741.94   9986.29    798.59 o
      3199    1   4  -7   8      3.55   -188.52    306.34 <
      3200    3   5   3 -12   4979.35   5469.68    544.61 o
      3200    2 -10  -7  -7   4979.35   5469.68    544.61 o
      3200    1   5  -7   8   4979.35   5469.68    544.61 o
      3201    1   6  -7   8    499.34    314.20    298.49 <
      3202    1  -8  -6   8     55.36   1005.44    764.55 <
      3203    1  -7  -6   8    334.87    971.40    678.15 <
      3204    1  -6  -6   8     20.17    466.06    463.44 <
      3205    1  -5  -6   8   2727.01   4136.95    680.76 o
      3206    1  -4  -6   8   1501.14   2044.91    492.24 o
      3207    1  -3  -6   8   1222.62   1688.82    644.11 <
      3208    1  -2  -6   8    302.62    539.38    476.54 <
      3209    1  -1  -6   8      1.26    -65.46    327.29 <
      3210    1   0  -6   8     30.77   -115.21    272.31 <
      3211    1   1  -6   8    862.07   1531.72    282.78 o
      3212    1   2  -6   8    299.48    484.39    206.85 <
      3213    1   3  -6   8     83.14    167.57    259.21 <
      3214    1   4  -6   8    728.53    628.40    267.07 <
      3215    1   5  -6   8    111.85     91.64    243.50 <
      3216    1   6  -6   8      6.20      0.00    240.89 <
      3217    1   7  -6   8      1.39     75.93    269.69 <
      3218    1  -8  -5   8   3540.39   4610.87   1078.75 o
      3219    1  -7  -5   8     39.22   -908.56    521.05 <
      3220    1  -6  -5   8   1762.53   1963.74    541.99 o
      3221    1  -5  -5   8     44.68    222.56    395.37 <
      3222    1  -4  -5   8     39.25    759.31    390.13 <
      3223    1  -3  -5   8      0.56    -60.22    303.73 <
      3224    1  -2  -5   8   3036.47   5189.52    919.03 o
      3225    1  -1  -5   8    238.04    290.63    298.49 <
      3226    1   0  -5   8    101.34    164.95    238.27 <
      3227    1   1  -5   8      1.42   -136.15    185.90 <
      3228    1   2  -5   8   1444.81   1885.19    253.98 o
      3229    1   3  -5   8    811.69    926.89    198.99 o
      3230    1   4  -5   8    195.78    343.00    225.18 <
      3231    1   5  -5   8      2.44    -60.22    198.99 <
      3232    1   6  -5   8    291.63     89.02    201.61 <
      3233    3  10   4  10   2977.86   2144.41    521.05 o
      3233    2  -2   8 -10   2977.86   2144.41    521.05 o
      3233    1  -8  -4   8   2977.86   2144.41    521.05 o
      3234    1  -7  -4   8     42.09   -565.56    337.76 <
      3235    3   9   4   7   5323.16   7265.85    874.52 o
      3235    2  -3   6  -9   5323.16   7265.85    874.52 o
      3235    1  -6  -4   8   5323.16   7265.85    874.52 o
      3236    1  -5  -4   8      9.56    238.27    361.33 <
      3237    3   8   4   4   8528.01  11798.20   1049.95 o
      3237    2  -4   4  -8   8528.01  11798.20   1049.95 o
      3237    1  -4  -4   8   8528.01  11798.20   1049.95 o
      3238    1  -3  -4   8    185.77    363.95    327.29 <
      3239    3   7   4   1  35693.10  35685.10   2063.24 o
      3239    2  -5   2  -7  35693.10  35685.10   2063.24 o
      3239    1  -2  -4   8  35693.10  35685.10   2063.24 o
      3240    1  -1  -4   8      3.99    102.11    201.61 <
      3241    3   6   4  -2  76825.10  77395.00   3272.90 o
      3241    2  -6   0  -6  76825.10  77395.00   3272.90 o
      3241    1   0  -4   8  76825.10  77395.00   3272.90 o
      3242    1   1  -4   8    181.03     89.02    170.19 <
      3243    3   5   4  -5  33492.60  31522.00   1392.95 o
      3243    2  -7  -2  -5  33492.60  31522.00   1392.95 o
      3243    1   2  -4   8  33492.60  31522.00   1392.95 o
      3244    1   3  -4   8    126.61     70.69    130.92 <
      3245    3   4   4  -8   7741.35   7001.40    408.46 o
      3245    2  -8  -4  -4   7741.35   7001.40    408.46 o
      3245    1   4  -4   8   7741.35   7001.40    408.46 o
      3246    1   5  -4   8    131.34      7.85    154.48 <
      3247    3   3   4 -11  15337.20  13727.90    662.44 o
      3247    2  -9  -6  -3  15337.20  13727.90    662.44 o
      3247    1   6  -4   8  15337.20  13727.90    662.44 o
      3248    1  -8  -3   8   1222.49   1039.47    473.92 <
      3249    1  -7  -3   8    482.43    974.02    403.22 <
      3250    1  -6  -3   8    820.73    497.48    358.71 <
      3251    1  -5  -3   8     72.01    267.07    256.60 <
      3252    1  -4  -3   8   3012.86   3469.28    531.52 o
      3253    1  -3  -3   8    579.61    788.11    324.67 <
      3254    1  -2  -3   8    180.27    248.74    219.94 <
      3255    1  -1  -3   8      9.57    -70.69    183.28 <
      3256    1   0  -3   8    353.64    251.36    162.34 <
      3257    1   1  -3   8    270.40    290.63    172.81 <
      3258    1   2  -3   8    372.47    939.98    201.61 o
      3259    1   3  -3   8     33.70     15.71    104.73 <
      3260    1   4  -3   8    152.44    227.79    136.15 <
      3261    1   5  -3   8    353.55    261.83    151.86 <
      3262    1   6  -3   8     40.63    214.70    159.72 <
      3263    1   7  -3   8    151.88   -141.39    408.46 <
      3264    1   8  -3   8   1242.63    939.98    513.19 <
      3265    1   9  -3   8    208.80   -225.18    864.05 <
      3266    1  -8  -2   8    226.88   -429.40    369.18 <
      3267    1  -7  -2   8   3437.18   2817.32    507.95 o
      3268    1  -6  -2   8    874.54    819.53    345.62 <
      3269    1  -5  -2   8    438.23    476.54    277.54 <
      3270    1  -4  -2   8    194.89   -107.35    222.56 <
      3271    1  -3  -2   8    398.89    932.12    235.65 o
      3272    1  -2  -2   8      4.94    -31.42    206.85 <
      3273    1  -1  -2   8   5008.87   6744.80    369.18 o
      3274    1   0  -2   8    984.26   1128.50    175.43 o
      3275    1   1  -2   8   1517.94   1835.45    198.99 o
      3276    1   2  -2   8    225.79    311.58    130.92 <
      3277    1   3  -2   8    430.31    426.79    109.97 o
      3278    1   4  -2   8    244.10    222.56     94.26 <
      3279    1   5  -2   8    104.19      5.24    157.10 <
      3280    1   6  -2   8     65.33     34.04    183.28 <
      3281    1   7  -2   8    824.51    921.65    225.18 o
      3282    1   8  -2   8    108.27   -146.63    225.18 <
      3283    1   9  -2   8    272.71    416.31    293.25 <
      3284    1  -8  -1   8    442.33    594.36    403.22 <
      3285    3   8   5  11   4517.70   4142.19    573.41 o
      3285    2  -1   9  -6   4517.70   4142.19    573.41 o
      3285    1  -7  -1   8   4517.70   4142.19    573.41 o
      3286    1  -6  -1   8     10.09     -5.24    306.34 <
      3287    3   7   5   8  25417.40  25497.20   1275.12 o
      3287    2  -2   7  -5  25417.40  25497.20   1275.12 o
      3287    1  -5  -1   8  25417.40  25497.20   1275.12 o
      3288    1  -4  -1   8    269.47     83.79    222.56 <
      3289    3   6   5   5  39706.00  40314.30   1832.83 o
      3289    2  -3   5  -4  39706.00  40314.30   1832.83 o
      3289    1  -3  -1   8  39706.00  40314.30   1832.83 o
      3290    1  -2  -1   8     20.10     28.80    151.86 <
      3291    3   5   5   2  63848.00  62523.00   2694.26 o
      3291    2  -4   3  -3  63848.00  62523.00   2694.26 o
      3291    1  -1  -1   8  63848.00  62523.00   2694.26 o
      3292    1   0  -1   8     28.28     73.31    130.92 <
      3293    3   4   5  -1  75673.40  71516.90   2330.31 o
      3293    2  -5   1  -2  75673.40  71516.90   2330.31 o
      3293    1   1  -1   8  75673.40  71516.90   2330.31 o
      3294    1   2  -1   8     15.88     -7.85    120.44 <
      3295    3   3   5  -4   3293.37   3655.18    230.41 o
      3295    2  -6  -1  -1   3293.37   3655.18    230.41 o
      3295    1   3  -1   8   3293.37   3655.18    230.41 o
      3296    1   4  -1   8    142.13    191.14    112.59 <
      3297    3   2   5  -7   6513.01   6037.85    358.71 o
      3297    2  -7  -3   0   6513.01   6037.85    358.71 o
      3297    1   5  -1   8   6513.01   6037.85    358.71 o
      3298    1   6  -1   8    351.57    204.23    178.05 <
      3299    3   1   5 -10   9439.37  10436.60    544.61 o
      3299    2  -8  -5   1   9439.37  10436.60    544.61 o
      3299    1   7  -1   8   9439.37  10436.60    544.61 o
      3300    1   8  -1   8     97.97    154.48    230.41 <
      3301    3   0   5 -13   3485.65   3924.87    408.46 o
      3301    2  -9  -7   2   3485.65   3924.87    408.46 o
      3301    1   9  -1   8   3485.65   3924.87    408.46 o
      3302    1  10  -1   8    112.55    -54.98    295.87 <
      3303    1  -8   0   8     49.29    269.69    531.52 <
      3304    1  -7   0   8    321.68    384.89    492.24 <
      3305    1  -6   0   8      7.41    366.57    298.49 <
      3306    1  -5   0   8    751.53    646.73    288.02 <
      3307    1  -4   0   8     86.48    322.05    217.32 <
      3308    1  -3   0   8    622.90   1044.71    238.27 o
      3309    1  -2   0   8    565.71    534.14    162.34 o
      3310    1  -1   0   8    335.56    136.15    141.39 <
      3311    1   0   0   8    159.72    172.81    138.77 <
      3312    1   1   0   8    144.28     47.13    138.77 <
      3313    1   2   0   8   1041.90    785.50    151.86 o
      3314    1   3   0   8     91.97     52.37    117.82 <
      3315    1   4   0   8     33.38   -123.06     96.88 <
      3316    1   5   0   8      4.76     18.33    107.35 <
      3317    1   6   0   8      6.62     23.56    157.10 <
      3318    1   7   0   8     77.65    141.39    178.05 <
      3319    1   8   0   8    185.42   -141.39    204.23 <
      3320    1   9   0   8   2977.43   4566.36    426.79 o
      3321    1  10   0   8    463.15    675.53    298.49 <
      3322    1  -8   1   8   2143.96   1068.28    452.97 <
      3323    1  -7   1   8    403.00    175.43    322.05 <
      3324    1  -6   1   8   1440.47   1060.42    518.43 <
      3325    1  -5   1   8   2262.39   1403.42    481.77 <
      3326    1  -4   1   8     84.14    282.78    261.83 <
      3327    1  -3   1   8    441.15    345.62    196.37 <
      3328    1  -2   1   8   4708.19   4849.14    479.15 o
      3329    1  -1   1   8   1029.19    500.10    183.28 <
      3330    1   0   1   8    748.65    740.99    196.37 o
      3331    1   1   1   8   1236.99   1207.05    172.81 o
      3332    1   2   1   8   3133.98   2990.13    201.61 o
      3333    1   3   1   8     97.16     -2.62    109.97 <
      3334    1   4   1   8     49.11   -109.97    115.21 <
      3335    1   5   1   8    794.54    843.10    133.54 o
      3336    1   6   1   8     84.33     89.02    112.59 <
      3337    1   7   1   8      8.76     75.93    180.66 <
      3338    1   8   1   8    799.27    898.09    243.50 o
      3339    1   9   1   8     18.71    193.76    243.50 <
      3340    1  10   1   8      3.46   -227.79    272.31 <
      3341    3   7   6  15    214.44     99.50    413.70 <
      3341    2   1  12  -3    214.44     99.50    413.70 <
      3341    1  -8   2   8    214.44     99.50    413.70 <
      3342    1  -7   2   8    161.46    162.34    329.91 <
      3343    3   6   6  12   3414.66   4330.71    484.39 o
      3343    2   0  10  -2   3414.66   4330.71    484.39 o
      3343    1  -6   2   8   3414.66   4330.71    484.39 o
      3344    1  -5   2   8    106.17      2.62    308.96 <
      3345    3   5   6   9  22343.10  24154.00   1162.54 o
      3345    2  -1   8  -1  22343.10  24154.00   1162.54 o
      3345    1  -4   2   8  22343.10  24154.00   1162.54 o
      3346    1  -3   2   8    299.25    -15.71    170.19 <
      3347    3   4   6   6  42212.90  42707.50   1639.07 o
      3347    2  -2   6   0  42212.90  42707.50   1639.07 o
      3347    1  -2   2   8  42212.90  42707.50   1639.07 o
      3348    1  -1   2   8     65.62    212.08    183.28 <
      3349    3   3   6   3  82751.20  78916.30   3348.84 o
      3349    2  -3   4   1  82751.20  78916.30   3348.84 o
      3349    1   0   2   8  82751.20  78916.30   3348.84 o
      3350    1   1   2   8     82.57    149.24    141.39 <
      3351    3   2   6   0  14904.90  15922.00    596.98 o
      3351    2  -4   2   2  14904.90  15922.00    596.98 o
      3351    1   2   2   8  14904.90  15922.00    596.98 o
      3352    1   3   2   8     74.36     81.17    115.21 <
      3353    3   1   6  -3   3398.76   3830.61    248.74 o
      3353    2  -5   0   3   3398.76   3830.61    248.74 o
      3353    1   4   2   8   3398.76   3830.61    248.74 o
      3354    1   5   2   8      1.78   -175.43    128.30 <
      3355    3   0   6  -6  43112.10  43919.80   1518.63 o
      3355    2  -6  -2   4  43112.10  43919.80   1518.63 o
      3355    1   6   2   8  43112.10  43919.80   1518.63 o
      3356    1   7   2   8     13.16   -136.15    159.72 <
      3357    3  -1   6  -9   8197.77  10112.00    502.72 o
      3357    2  -7  -4   5   8197.77  10112.00    502.72 o
      3357    1   8   2   8   8197.77  10112.00    502.72 o
      3358    1   9   2   8    225.96    282.78    259.21 <
      3359    3  -2   6 -12  11250.30  12746.00    898.09 o
      3359    2  -8  -6   6  11250.30  12746.00    898.09 o
      3359    1  10   2   8  11250.30  12746.00    898.09 o
      3360    1  11   2   8      3.79    104.73    397.98 <
      3361    1  -8   3   8    438.27    761.93    484.39 <
      3362    1  -7   3   8    282.82    196.37    366.57 <
      3363    1  -6   3   8    116.37     10.47    324.67 <
      3364    1  -5   3   8    183.31    196.37    261.83 <
      3365    1  -4   3   8    180.66    277.54    277.54 <
      3366    1  -3   3   8    164.49    238.27    238.27 <
      3367    1  -2   3   8    890.63    950.45    248.74 o
      3368    1  -1   3   8    553.07    657.20    214.70 o
      3369    1   0   3   8    382.26    418.93    191.14 <
      3370    1   1   3   8    275.62    439.88    183.28 <
      3371    1   2   3   8     46.43    -36.66    144.01 <
      3372    1   3   3   8    456.95    246.12    149.24 <
      3373    1   4   3   8    289.54    272.31    146.63 <
      3374    1   5   3   8     47.16      0.00    151.86 <
      3375    1   6   3   8      0.14     49.75    162.34 <
      3376    1   7   3   8    554.00    432.02    201.61 <
      3377    1   8   3   8    473.96    395.37    196.37 <
      3378    1   9   3   8      4.61    162.34    238.27 <
      3379    1  10   3   8   1322.26   1348.44    418.93 o
      3380    1  11   3   8    237.73    578.65    424.17 <
      3381    1  -7   4   8   1424.02   1301.31    476.54 <
      3382    1  -6   4   8    787.85    133.54    384.89 <
      3383    1  -5   4   8    187.98    128.30    295.87 <
      3384    1  -4   4   8   1726.26   1369.38    327.29 o
      3385    1  -3   4   8    462.88    555.09    282.78 <
      3386    1  -2   4   8    244.02    298.49    222.56 <
      3387    1  -1   4   8   4368.13   4639.67    371.80 o
      3388    1   0   4   8   2571.73   2916.81    298.49 o
      3389    1   1   4   8    668.47    345.62    159.72 <
      3390    1   2   4   8     66.78    607.45    191.14 o
      3391    1   3   4   8    568.48    756.70    172.81 o
      3392    1   4   4   8    322.34    727.89    178.05 o
      3393    1   5   4   8    458.20    390.13    180.66 <
      3394    1   6   4   8   1690.85   2123.46    253.98 o
      3395    1   7   4   8    459.00    513.19    253.98 <
      3396    1   8   4   8     37.14     70.69    274.92 <
      3397    1   9   4   8    396.81    345.62    298.49 <
      3398    1  10   4   8    253.06    214.70    306.34 <
      3399    1  11   4   8      1.15     49.75    340.38 <
      3400    3   5   7  16   1623.30   1233.23    562.94 <
      3400    2   2  13   1   1623.30   1233.23    562.94 <
      3400    1  -7   5   8   1623.30   1233.23    562.94 <
      3401    1  -6   5   8    273.42    429.40    633.63 <
      3402    3   4   7  13  14813.10  16283.40    926.89 o
      3402    2   1  11   2  14813.10  16283.40    926.89 o
      3402    1  -5   5   8  14813.10  16283.40    926.89 o
      3403    1  -4   5   8    202.57    699.09    335.14 <
      3404    3   3   7  10  14921.00  14893.00    843.10 o
      3404    2   0   9   3  14921.00  14893.00    843.10 o
      3404    1  -3   5   8  14921.00  14893.00    843.10 o
      3405    1  -2   5   8    278.70    578.65    301.11 <
      3406    3   2   7   7  46621.90  44849.30   2073.71 o
      3406    2  -1   7   4  46621.90  44849.30   2073.71 o
      3406    1  -1   5   8  46621.90  44849.30   2073.71 o
      3407    1   0   5   8     84.00    348.24    214.70 <
      3408    3   1   7   4  40179.60  40515.90   1599.80 o
      3408    2  -2   5   5  40179.60  40515.90   1599.80 o
      3408    1   1   5   8  40179.60  40515.90   1599.80 o
      3409    1   2   5   8      4.29   -130.92    183.28 <
      3410    3   0   7   1  13083.80  11222.10    552.47 o
      3410    2  -3   3   6  13083.80  11222.10    552.47 o
      3410    1   3   5   8  13083.80  11222.10    552.47 o
      3411    1   4   5   8     14.49    178.05    178.05 <
      3412    3  -1   7  -2   4267.86   4825.57    358.71 o
      3412    2  -4   1   7   4267.86   4825.57    358.71 o
      3412    1   5   5   8   4267.86   4825.57    358.71 o
      3413    1   6   5   8      5.01   -209.47    198.99 <
      3414    3  -2   7  -5  23954.70  23093.60   1372.00 o
      3414    2  -5  -1   8  23954.70  23093.60   1372.00 o
      3414    1   7   5   8  23954.70  23093.60   1372.00 o
      3415    1   8   5   8    206.71    303.73    290.63 <
      3416    3  -3   7  -8   8201.84   9284.58    814.30 o
      3416    2  -6  -3   9   8201.84   9284.58    814.30 o
      3416    1   9   5   8   8201.84   9284.58    814.30 o
      3417    1  10   5   8     76.63    217.32    353.47 <
      3418    3  -4   7 -11  15383.10  16581.80   1133.73 o
      3418    2  -7  -5  10  15383.10  16581.80   1133.73 o
      3418    1  11   5   8  15383.10  16581.80   1133.73 o
      3419    1  -6   6   8     11.72   -217.32    536.76 <
      3420    1  -5   6   8    199.64    411.08    382.27 <
      3421    1  -4   6   8     45.76    259.21    340.38 <
      3422    1  -3   6   8      4.19     20.95    293.25 <
      3423    1  -2   6   8    978.28    832.63    314.20 <
      3424    1  -1   6   8   1133.29    727.89    261.83 <
      3425    1   0   6   8    531.65    633.63    235.65 <
      3426    1   1   6   8     86.33    -18.33    267.07 <
      3427    1   2   6   8   1460.66   1269.89    295.87 o
      3428    1   3   6   8     42.01    -13.09    238.27 <
      3429    1   4   6   8    186.33    382.27    259.21 <
      3430    1   5   6   8     21.62    183.28    233.03 <
      3431    1   6   6   8    137.46    -47.13    230.41 <
      3432    1   7   6   8    130.97   -115.21    277.54 <
      3433    1   8   6   8    854.44    468.68    319.44 <
      3434    1   9   6   8    408.38     52.37    455.59 <
      3435    1  10   6   8    173.42  -1131.12    463.44 <
      3436    1  11   6   8     15.26   -523.66    518.43 <
      3437    1  -6   7   8    475.62    392.75    536.76 <
      3438    1  -5   7   8   1353.94    505.34    654.58 <
      3439    1  -4   7   8    259.56     81.17    345.62 <
      3440    1  -3   7   8    800.55   1086.60    374.42 <
      3441    1  -2   7   8   1703.54   2118.22    400.60 o
      3442    1  -1   7   8   1274.26   1662.64    350.86 o
      3443    1   0   7   8    398.49    450.35    308.96 <
      3444    1   1   7   8   2326.18   2649.74    392.75 o
      3445    1   2   7   8   1158.75    913.79    301.11 o
      3446    1   3   7   8    107.71     78.55    267.07 <
      3447    1   4   7   8      0.97   -298.49    246.12 <
      3448    1   5   7   8   1811.06   1385.09    332.53 o
      3449    1   6   7   8    252.15    219.94    327.29 <
      3450    1   7   7   8    271.48    183.28    439.88 <
      3451    1   8   7   8    206.97   -290.63    455.59 <
      3452    1   9   7   8     10.73    363.95    468.68 <
      3453    1  10   7   8     93.32   -175.43    560.32 <
      3454    1  -5   8   8    161.19    555.09    562.94 <
      3455    3   2   8  14   8295.49   6896.67   1023.76 o
      3455    2   2  12   6   8295.49   6896.67   1023.76 o
      3455    1  -4   8   8   8295.49   6896.67   1023.76 o
      3456    1  -3   8   8    116.74    112.59    492.24 <
      3457    3   1   8  11   1672.53   2183.68    526.28 o
      3457    2   1  10   7   1672.53   2183.68    526.28 o
      3457    1  -2   8   8   1672.53   2183.68    526.28 o
      3458    1  -1   8   8    310.53    120.44    411.08 <
      3459    3   0   8   8  20127.40  21289.60   1385.09 o
      3459    2   0   8   8  20127.40  21289.60   1385.09 o
      3459    1   0   8   8  20127.40  21289.60   1385.09 o
      3460    1   1   8   8      4.97    120.44    277.54 <
      3461    3  -1   8   5   1553.81   2285.80    403.22 o
      3461    2  -1   6   9   1553.81   2285.80    403.22 o
      3461    1   2   8   8   1553.81   2285.80    403.22 o
      3462    1   3   8   8      9.39    447.73    303.73 <
      3463    3  -2   8   2   1476.68    164.95    298.49 <
      3463    2  -2   4  10   1476.68    164.95    298.49 <
      3463    1   4   8   8   1476.68    164.95    298.49 <
      3464    1   5   8   8     17.17     47.13    293.25 <
      3465    3  -3   8  -1  19019.20  18715.80   1031.62 o
      3465    2  -3   2  11  19019.20  18715.80   1031.62 o
      3465    1   6   8   8  19019.20  18715.80   1031.62 o
      3466    1   7   8   8     94.40    -60.22    497.48 <
      3467    3  -4   8  -4  11636.30  11633.20   1437.46 o
      3467    2  -4   0  12  11636.30  11633.20   1437.46 o
      3467    1   8   8   8  11636.30  11633.20   1437.46 o
      3468    1   9   8   8     37.42   -421.55    555.09 <
      3469    3  -5   8  -7  13149.50  11405.40   1484.59 o
      3469    2  -5  -2  13  13149.50  11405.40   1484.59 o
      3469    1  10   8   8  13149.50  11405.40   1484.59 o
      3470    1  -4   9   8    467.88    248.74    644.11 <
      3471    1  -3   9   8     91.82    -44.51    539.38 <
      3472    1  -2   9   8    317.13    382.27    515.81 <
      3473    1  -1   9   8    204.65   -198.99    382.27 <
      3474    1   0   9   8    143.27    -78.55    421.55 <
      3475    1   1   9   8     69.33    154.48    413.70 <
      3476    1   2   9   8    425.90    282.78    329.91 <
      3477    1   3   9   8    362.07    654.58    343.00 <
      3478    1   4   9   8      0.93    235.65    324.67 <
      3479    1   5   9   8      4.51    227.79    316.82 <
      3480    1   6   9   8     28.45    185.90    392.75 <
      3481    1   7   9   8    359.69    366.57    589.12 <
      3482    1   8   9   8    207.56    953.07    607.45 <
      3483    1   9   9   8    403.52   1500.30    704.33 <
      3484    1  10   9   8     48.50   -115.21    568.18 <
      3485    1  -3  10   8    548.12    780.26    638.87 <
      3486    1  -2  10   8    172.31    311.58    570.79 <
      3487    1  -1  10   8    799.53    908.56    604.83 <
      3488    1   0  10   8   1462.87   1772.61    665.05 <
      3489    1   1  10   8     30.10   -146.63    405.84 <
      3490    1   2  10   8    553.78    107.35    547.23 <
      3491    1   3  10   8    159.32    233.03    400.60 <
      3492    1   4  10   8    850.76    526.28    379.66 <
      3493    1   5  10   8     68.49    219.94    387.51 <
      3494    1   6  10   8   1411.75   2217.72    547.23 o
      3495    1   7  10   8     85.82    397.98    549.85 <
      3496    1   8  10   8     86.26    285.40    578.65 <
      3497    1   9  10   8     87.43   1141.59    712.18 <
      3498    1  -2  11   8    205.33   -489.63    515.81 <
      3499    3  -1   9  12   1520.94    772.41    589.12 <
      3499    2   2  11  11   1520.94    772.41    589.12 <
      3499    1  -1  11   8   1520.94    772.41    589.12 <
      3500    1   0  11   8     54.05    146.63    547.23 <
      3501    3  -2   9   9   1089.17    819.53    552.47 <
      3501    2   1   9  12   1089.17    819.53    552.47 <
      3501    1   1  11   8   1089.17    819.53    552.47 <
      3502    1   2  11   8      8.65     49.75    552.47 <
      3503    3  -3   9   6   4585.98   5199.99   1060.42 o
      3503    2   0   7  13   4585.98   5199.99   1060.42 o
      3503    1   3  11   8   4585.98   5199.99   1060.42 o
      3504    1   4  11   8      6.19    -91.64    657.20 <
      3505    3  -4   9   3   1651.76   2047.53    549.85 o
      3505    2  -1   5  14   1651.76   2047.53    549.85 o
      3505    1   5  11   8   1651.76   2047.53    549.85 o
      3506    1   6  11   8    193.34     68.08    463.44 <
      3507    3  -5   9   0   7694.47   4451.15   1015.91 o
      3507    2  -2   3  15   7694.47   4451.15   1015.91 o
      3507    1   7  11   8   7694.47   4451.15   1015.91 o
      3508    1   8  11   8     27.55    -68.08    657.20 <
      3509    1   0  12   8    113.89   -466.06    562.94 <
      3510    1   1  12   8    132.43   1804.03    809.06 <
      3511    1   2  12   8    331.92     78.55    688.62 <
      3512    1   3  12   8    154.15    -65.46    615.31 <
      3513    1   4  12   8    393.77     54.98    636.25 <
      3514    1   5  12   8     12.24   -267.07    649.34 <
      3515    1   6  12   8     12.99     13.09    502.72 <
      3516    1   7  12   8     14.31   -329.91    675.53 <
      3517    1   3  13   8    294.22   1173.01    740.99 <
      3518    1   4  13   8      3.09    191.14    754.08 <
      3519    3  11   3   0  19848.20  16788.70   1811.88 o
      3519    2  -7   1 -14  19848.20  16788.70   1811.88 o
      3519    1  -4  -9   9  19848.20  16788.70   1811.88 o
      3520    1  -3  -9   9     31.84   -204.23    568.18 <
      3521    3  10   3  -3  19605.50  21695.40   2078.95 o
      3521    2  -8  -1 -13  19605.50  21695.40   2078.95 o
      3521    1  -2  -9   9  19605.50  21695.40   2078.95 o
      3522    1  -1  -9   9      9.30    267.07    547.23 <
      3523    3   9   3  -6  14608.60  14565.70   1461.02 o
      3523    2  -9  -3 -12  14608.60  14565.70   1461.02 o
      3523    1   0  -9   9  14608.60  14565.70   1461.02 o
      3524    1   1  -9   9      5.49    146.63    413.70 <
      3525    3   8   3  -9   5788.71   5464.44    675.53 o
      3525    2 -10  -5 -11   5788.71   5464.44    675.53 o
      3525    1   2  -9   9   5788.71   5464.44    675.53 o
      3526    1  -6  -8   9   2752.60   2288.42    934.74 <
      3527    1  -5  -8   9    392.20    240.89    720.04 <
      3528    1  -4  -8   9    156.43    319.44    599.60 <
      3529    1  -3  -8   9    117.11    115.21    521.05 <
      3530    1  -2  -8   9   1256.13    565.56    591.74 <
      3531    1  -1  -8   9    628.71    798.59    562.94 <
      3532    1   0  -8   9     63.04   -911.18    384.89 <
      3533    1   1  -8   9    517.96    675.53    439.88 <
      3534    1   2  -8   9    162.50      2.62    390.13 <
      3535    1   3  -8   9      0.11  -1173.01    560.32 <
      3536    1   4  -8   9     66.65   -112.59    633.63 <
      3537    1  -6  -7   9     16.68     -5.24    638.87 <
      3538    1  -5  -7   9   1824.35   2649.74    856.19 o
      3539    1  -4  -7   9     17.78   -686.00    526.28 <
      3540    1  -3  -7   9    348.96    500.10    555.09 <
      3541    1  -2  -7   9    200.28   -227.79    507.95 <
      3542    1  -1  -7   9    297.47    185.90    494.86 <
      3543    1   0  -7   9    785.54    466.06    390.13 <
      3544    1   1  -7   9   1098.92   1434.84    429.40 o
      3545    1   2  -7   9    141.94    738.37    353.47 <
      3546    1   3  -7   9     55.99    -49.75    308.96 <
      3547    1   4  -7   9      2.55    -26.18    314.20 <
      3548    1   5  -7   9    646.64    353.47    332.53 <
      3549    3  11   4   7   2606.28   2047.53    864.05 <
      3549    2  -4   6 -12   2606.28   2047.53    864.05 <
      3549    1  -7  -6   9   2606.28   2047.53    864.05 <
      3550    1  -6  -6   9    294.55    515.81    507.95 <
      3551    3  10   4   4  14214.90  18315.20   1529.10 o
      3551    2  -5   4 -11  14214.90  18315.20   1529.10 o
      3551    1  -5  -6   9  14214.90  18315.20   1529.10 o
      3552    1  -4  -6   9     79.90   -264.45    534.14 <
      3553    3   9   4   1  37082.70  40416.40   3380.26 o
      3553    2  -6   2 -10  37082.70  40416.40   3380.26 o
      3553    1  -3  -6   9  37082.70  40416.40   3380.26 o
      3554    1  -2  -6   9     54.49    214.70    479.15 <
      3555    3   8   4  -2  18287.00  20826.10   1890.43 o
      3555    2  -7   0  -9  18287.00  20826.10   1890.43 o
      3555    1  -1  -6   9  18287.00  20826.10   1890.43 o
      3556    1   0  -6   9      1.04    277.54    324.67 <
      3557    3   7   4  -5   9949.93   9470.48    761.93 o
      3557    2  -8  -2  -8   9949.93   9470.48    761.93 o
      3557    1   1  -6   9   9949.93   9470.48    761.93 o
      3558    1   2  -6   9     38.00    363.95    246.12 <
      3559    3   6   4  -8   4743.59   5338.76    424.17 o
      3559    2  -9  -4  -7   4743.59   5338.76    424.17 o
      3559    1   3  -6   9   4743.59   5338.76    424.17 o
      3560    1   4  -6   9    104.00    102.11    282.78 <
      3561    3   5   4 -11   3647.92   4411.88    473.92 o
      3561    2 -10  -6  -6   3647.92   4411.88    473.92 o
      3561    1   5  -6   9   3647.92   4411.88    473.92 o
      3562    1   6  -6   9    220.51    471.30    290.63 <
      3563    1  -7  -5   9   3217.43   4139.57    968.78 o
      3564    1  -6  -5   9    798.97   1662.64    612.69 <
      3565    1  -5  -5   9    933.33    929.51    489.63 <
      3566    1  -4  -5   9     37.95   -426.79    363.95 <
      3567    1  -3  -5   9    377.17    541.99    418.93 <
      3568    1  -2  -5   9    127.78   -434.64    408.46 <
      3569    1  -1  -5   9   1972.74   2277.94    432.02 o
      3570    1   0  -5   9    267.48   -261.83    238.27 <
      3571    1   1  -5   9     65.75   -193.76    248.74 <
      3572    1   2  -5   9    166.37   -238.27    196.37 <
      3573    1   3  -5   9      2.46    450.35    206.85 <
      3574    1   4  -5   9      0.36   -172.81    238.27 <
      3575    1   5  -5   9    164.98    -81.17    230.41 <
      3576    1   6  -5   9    327.52    138.77    230.41 <
      3577    1   7  -5   9    619.99    866.66    248.74 o
      3578    1  -8  -4   9    621.85    345.62    727.89 <
      3579    1  -7  -4   9    255.05    319.44    699.09 <
      3580    1  -6  -4   9    989.94    950.45    484.39 <
      3581    1  -5  -4   9    108.59    274.92    390.13 <
      3582    1  -4  -4   9   2569.76   4139.57    633.63 o
      3583    1  -3  -4   9    312.42    740.99    384.89 <
      3584    1  -2  -4   9     40.81    526.28    322.05 <
      3585    1  -1  -4   9    106.41    274.92    319.44 <
      3586    1   0  -4   9     89.88    298.49    282.78 <
      3587    1   1  -4   9    386.72    471.30    227.79 <
      3588    1   2  -4   9   1621.91   2060.62    274.92 o
      3589    1   3  -4   9     12.54     54.98    178.05 <
      3590    1   4  -4   9   1192.02   1793.55    298.49 o
      3591    1   5  -4   9     76.18    259.21    219.94 <
      3592    1   6  -4   9    154.67    104.73    204.23 <
      3593    1   7  -4   9    124.70    319.44    185.90 <
      3594    3  10   5  11   6548.37   7925.67   1280.36 o
      3594    2  -2   9  -9   6548.37   7925.67   1280.36 o
      3594    1  -8  -3   9   6548.37   7925.67   1280.36 o
      3595    1  -7  -3   9    512.00    628.40    599.60 <
      3596    3   9   5   8  11683.90  12235.40    989.73 o
      3596    2  -3   7  -8  11683.90  12235.40    989.73 o
      3596    1  -6  -3   9  11683.90  12235.40    989.73 o
      3597    1  -5  -3   9    235.69   -125.68    269.69 <
      3598    3   8   5   5  47267.30  47719.00   2720.44 o
      3598    2  -4   5  -7  47267.30  47719.00   2720.44 o
      3598    1  -4  -3   9  47267.30  47719.00   2720.44 o
      3599    1  -3  -3   9     12.63   -350.86    311.58 <
      3600    3   7   5   2  58174.70  61954.80   3393.35 o
      3600    2  -5   3  -6  58174.70  61954.80   3393.35 o
      3600    1  -2  -3   9  58174.70  61954.80   3393.35 o
      3601    1  -1  -3   9    193.80     47.13    204.23 <
      3602    3   6   5  -1  29435.10  29804.40   1670.49 o
      3602    2  -6   1  -5  29435.10  29804.40   1670.49 o
      3602    1   0  -3   9  29435.10  29804.40   1670.49 o
      3603    1   1  -3   9     34.00    -75.93    178.05 <
      3604    3   5   5  -4  10042.90   8739.96    487.01 o
      3604    2  -7  -1  -4  10042.90   8739.96    487.01 o
      3604    1   2  -3   9  10042.90   8739.96    487.01 o
      3605    1   3  -3   9    110.41    282.78    178.05 <
      3606    3   4   5  -7   4570.05   4788.91    269.69 o
      3606    2  -8  -3  -3   4570.05   4788.91    269.69 o
      3606    1   4  -3   9   4570.05   4788.91    269.69 o
      3607    1   5  -3   9     66.73    -75.93    180.66 <
      3608    3   3   5 -10   4347.38   5179.04    350.86 o
      3608    2  -9  -5  -2   4347.38   5179.04    350.86 o
      3608    1   6  -3   9   4347.38   5179.04    350.86 o
      3609    1   7  -3   9     73.78    261.83    235.65 <
      3610    3   2   5 -13  11543.40  11109.50    686.00 o
      3610    2 -10  -7  -1  11543.40  11109.50    686.00 o
      3610    1   8  -3   9  11543.40  11109.50    686.00 o
      3611    1  -8  -2   9    884.62    447.73    439.88 <
      3612    1  -7  -2   9    611.82   1248.94    426.79 <
      3613    1  -6  -2   9   1832.57   2257.00    439.88 o
      3614    1  -5  -2   9     23.04    198.99    256.60 <
      3615    1  -4  -2   9      4.11    421.55    261.83 <
      3616    1  -3  -2   9    349.04    565.56    233.03 <
      3617    1  -2  -2   9   1050.14   1591.94    369.18 o
      3618    1  -1  -2   9     47.27    280.16    219.94 <
      3619    1   0  -2   9    219.15    515.81    159.72 o
      3620    1   1  -2   9     70.27     31.42    151.86 <
      3621    1   2  -2   9      4.09   -120.44    146.63 <
      3622    1   3  -2   9      8.00    -99.50    141.39 <
      3623    1   4  -2   9      9.41    -39.27     96.88 <
      3624    1   5  -2   9     24.29    361.33    172.81 <
      3625    1   6  -2   9   1829.90   2037.06    267.07 o
      3626    1   7  -2   9    389.32    615.31    233.03 <
      3627    1   8  -2   9    120.52     57.60    269.69 <
      3628    1   9  -2   9     16.84    -47.13    322.05 <
      3629    1  -8  -1   9   1081.88   1516.01    730.51 <
      3630    1  -7  -1   9    523.56     34.04    337.76 <
      3631    1  -6  -1   9    151.85    -28.80    322.05 <
      3632    1  -5  -1   9   3399.78   2762.33    657.20 o
      3633    1  -4  -1   9    156.74    432.02    259.21 <
      3634    1  -3  -1   9   1607.01   1777.84    293.25 o
      3635    1  -2  -1   9    332.87    581.27    209.47 <
      3636    1  -1  -1   9    195.98     39.27    188.52 <
      3637    1   0  -1   9      0.88     23.56    149.24 <
      3638    1   1  -1   9   2455.47   2301.51    233.03 o
      3639    1   2  -1   9    559.41    581.27    178.05 o
      3640    1   3  -1   9      0.09   -269.69    151.86 <
      3641    1   4  -1   9    113.01     57.60    117.82 <
      3642    1   5  -1   9   1547.82   1345.82    149.24 o
      3643    1   6  -1   9     50.85     20.95    170.19 <
      3644    1   7  -1   9     34.44    209.47    209.47 <
      3645    1   8  -1   9    175.01     91.64    230.41 <
      3646    1   9  -1   9     15.63    206.85    285.40 <
      3647    1  -8   0   9     14.88   -337.76    361.33 <
      3648    3   8   6  12   7191.35   6880.96   1049.95 o
      3648    2  -1  10  -5   7191.35   6880.96   1049.95 o
      3648    1  -7   0   9   7191.35   6880.96   1049.95 o
      3649    1  -6   0   9    686.82    180.66    434.64 <
      3650    3   7   6   9  20659.00  17815.10   1159.92 o
      3650    2  -2   8  -4  20659.00  17815.10   1159.92 o
      3650    1  -5   0   9  20659.00  17815.10   1159.92 o
      3651    1  -4   0   9     17.97    141.39    238.27 <
      3652    3   6   6   6  34658.20  37976.20   1746.42 o
      3652    2  -3   6  -3  34658.20  37976.20   1746.42 o
      3652    1  -3   0   9  34658.20  37976.20   1746.42 o
      3653    1  -2   0   9    153.91   -157.10    164.95 <
      3654    3   5   6   3   9944.19  10816.30    612.69 o
      3654    2  -4   4  -2   9944.19  10816.30    612.69 o
      3654    1  -1   0   9   9944.19  10816.30    612.69 o
      3655    1   0   0   9     70.95    288.02    178.05 <
      3656    3   4   6   0   9903.47   9687.80    662.44 o
      3656    2  -5   2  -1   9903.47   9687.80    662.44 o
      3656    1   1   0   9   9903.47   9687.80    662.44 o
      3657    1   2   0   9      2.23     62.84    141.39 <
      3658    3   3   6  -3  20898.40  20213.50    945.22 o
      3658    2  -6   0   0  20898.40  20213.50    945.22 o
      3658    1   3   0   9  20898.40  20213.50    945.22 o
      3659    1   4   0   9     43.78    -57.60    154.48 <
      3660    3   2   6  -6  10433.90  11319.00    432.02 o
      3660    2  -7  -2   1  10433.90  11319.00    432.02 o
      3660    1   5   0   9  10433.90  11319.00    432.02 o
      3661    1   6   0   9    451.21    303.73    180.66 <
      3662    3   1   6  -9  15677.20  17160.50    777.64 o
      3662    2  -8  -4   2  15677.20  17160.50    777.64 o
      3662    1   7   0   9  15677.20  17160.50    777.64 o
      3663    1   8   0   9     97.78    -41.89    235.65 <
      3664    3   0   6 -12  33541.30  34046.10   1720.24 o
      3664    2  -9  -6   3  33541.30  34046.10   1720.24 o
      3664    1   9   0   9  33541.30  34046.10   1720.24 o
      3665    1  10   0   9    191.43    319.44    322.05 <
      3666    1  -8   1   9    396.49     65.46    432.02 <
      3667    1  -7   1   9   1038.82    824.77    416.31 <
      3668    1  -6   1   9     10.59    107.35    343.00 <
      3669    1  -5   1   9    258.65    371.80    382.27 <
      3670    1  -4   1   9   1429.26   1720.24    363.95 o
      3671    1  -3   1   9     15.48    458.21    267.07 <
      3672    1  -2   1   9    364.55    429.40    269.69 <
      3673    1  -1   1   9    598.92    594.36    424.17 <
      3674    1   0   1   9    197.26    -57.60    170.19 <
      3675    1   1   1   9     17.05     44.51    136.15 <
      3676    1   2   1   9      2.21     -2.62    144.01 <
      3677    1   3   1   9     73.94    170.19    130.92 <
      3678    1   4   1   9    382.22    466.06    164.95 <
      3679    1   5   1   9    200.43     15.71    162.34 <
      3680    1   6   1   9      0.41     -5.24    138.77 <
      3681    1   7   1   9    787.34   1777.84    219.94 o
      3682    1   8   1   9    233.17    534.14    246.12 <
      3683    1   9   1   9     46.01    -94.26    261.83 <
      3684    1  10   1   9    366.28    513.19    335.14 <
      3685    1  -7   2   9   1255.90    921.65    411.08 <
      3686    1  -6   2   9    715.29    678.15    345.62 <
      3687    1  -5   2   9    296.65    -65.46    311.58 <
      3688    1  -4   2   9   3572.02   4152.66    523.66 o
      3689    1  -3   2   9    808.06   1678.35    405.84 o
      3690    1  -2   2   9    212.83    395.37    293.25 <
      3691    1  -1   2   9    165.96    109.97    259.21 <
      3692    1   0   2   9    116.53    -34.04    191.14 <
      3693    1   1   2   9    199.73    120.44    157.10 <
      3694    1   2   2   9   3097.42   2741.39    214.70 o
      3695    1   3   2   9   2306.11   2249.14    212.08 o
      3696    1   4   2   9   1324.09   1204.43    204.23 o
      3697    1   5   2   9     27.19    -73.31    157.10 <
      3698    1   6   2   9    532.23    455.59    170.19 <
      3699    1   7   2   9    105.42    293.25    178.05 <
      3700    1   8   2   9    132.25    264.45    198.99 <
      3701    1   9   2   9    499.96    198.99    277.54 <
      3702    1  10   2   9    296.68    306.34    363.95 <
      3703    1  -7   3   9    544.77    549.85    450.35 <
      3704    3   6   7  13   6749.16   5100.50    657.20 o
      3704    2   0  11  -1   6749.16   5100.50    657.20 o
      3704    1  -6   3   9   6749.16   5100.50    657.20 o
      3705    1  -5   3   9    449.70   -253.98    290.63 <
      3706    3   5   7  10  31478.70  32645.30   1958.51 o
      3706    2  -1   9   0  31478.70  32645.30   1958.51 o
      3706    1  -4   3   9  31478.70  32645.30   1958.51 o
      3707    1  -3   3   9    142.71   1262.03    497.48 <
      3708    3   4   7   7  32175.00  36578.00   2099.90 o
      3708    2  -2   7   1  32175.00  36578.00   2099.90 o
      3708    1  -2   3   9  32175.00  36578.00   2099.90 o
      3709    1  -1   3   9    164.75   -157.10    251.36 <
      3710    3   3   7   4    816.42    908.56    314.20 <
      3710    2  -3   5   2    816.42    908.56    314.20 <
      3710    1   0   3   9    816.42    908.56    314.20 <
      3711    1   1   3   9      0.05   -212.08    172.81 <
      3712    3   2   7   1   9544.75   9253.16    463.44 o
      3712    2  -4   3   3   9544.75   9253.16    463.44 o
      3712    1   2   3   9   9544.75   9253.16    463.44 o
      3713    1   3   3   9     36.52    -52.37    138.77 <
      3714    3   1   7  -2  33814.30  31744.60   1120.64 o
      3714    2  -5   1   4  33814.30  31744.60   1120.64 o
      3714    1   4   3   9  33814.30  31744.60   1120.64 o
      3715    1   5   3   9    131.35    -57.60    162.34 <
      3716    3   0   7  -5   5616.81   6988.31    424.17 o
      3716    2  -6  -1   5   5616.81   6988.31    424.17 o
      3716    1   6   3   9   5616.81   6988.31    424.17 o
      3717    1   7   3   9    113.51    308.96    219.94 <
      3718    3  -1   7  -8  21141.20  22842.30   1013.29 o
      3718    2  -7  -3   6  21141.20  22842.30   1013.29 o
      3718    1   8   3   9  21141.20  22842.30   1013.29 o
      3719    1   9   3   9    260.87    382.27    308.96 <
      3720    3  -2   7 -11  17315.50  17102.90   1330.11 o
      3720    2  -8  -5   7  17315.50  17102.90   1330.11 o
      3720    1  10   3   9  17315.50  17102.90   1330.11 o
      3721    1  -7   4   9    533.03   1463.64    541.99 <
      3722    1  -6   4   9    179.63     94.26    426.79 <
      3723    1  -5   4   9    144.47   -164.95    434.64 <
      3724    1  -4   4   9      7.96   -424.17    411.08 <
      3725    1  -3   4   9    292.60    680.76    377.04 <
      3726    1  -2   4   9     17.52   -151.86    269.69 <
      3727    1  -1   4   9    543.06   -146.63    267.07 <
      3728    1   0   4   9      5.89   -209.47    246.12 <
      3729    1   1   4   9    517.11     70.69    243.50 <
      3730    1   2   4   9    238.59     65.46    188.52 <
      3731    1   3   4   9    189.79    387.51    191.14 <
      3732    1   4   4   9    315.84    267.07    214.70 <
      3733    1   5   4   9   1959.10   2149.64    293.25 o
      3734    1   6   4   9    295.17    746.22    248.74 <
      3735    1   7   4   9     69.82    319.44    269.69 <
      3736    1   8   4   9     77.05    547.23    293.25 <
      3737    1   9   4   9      8.03   -340.38    259.21 <
      3738    1  10   4   9    107.60    526.28    353.47 <
      3739    1  -6   5   9    408.06    282.78    604.83 <
      3740    1  -5   5   9   1076.54    343.00    471.30 <
      3741    1  -4   5   9    341.89   1039.47    500.10 <
      3742    1  -3   5   9   1551.29   1173.01    487.01 <
      3743    1  -2   5   9   1700.96   2175.83    494.86 o
      3744    1  -1   5   9     37.14   -191.14    303.73 <
      3745    1   0   5   9    506.14    822.15    322.05 <
      3746    1   1   5   9   1453.32    714.80    293.25 <
      3747    1   2   5   9   2621.37   2767.57    379.66 o
      3748    1   3   5   9    550.78    500.10    269.69 <
      3749    1   4   5   9   1552.52   1461.02    267.07 o
      3750    1   5   5   9   1302.09   1162.54    269.69 o
      3751    1   6   5   9      9.01   -382.27    222.56 <
      3752    1   7   5   9     41.32    -44.51    253.98 <
      3753    1   8   5   9   1141.72   1173.01    377.04 o
      3754    1   9   5   9      0.64    290.63    319.44 <
      3755    1  10   5   9    237.78    693.86    392.75 <
      3756    1  -6   6   9    319.21    314.20    620.54 <
      3757    3   4   8  14   1593.53   1301.31    659.82 <
      3757    2   1  12   3   1593.53   1301.31    659.82 <
      3757    1  -5   6   9   1593.53   1301.31    659.82 <
      3758    1  -4   6   9    279.27    301.11    418.93 <
      3759    3   3   8  11   7762.09   9347.42    900.70 o
      3759    2   0  10   4   7762.09   9347.42    900.70 o
      3759    1  -3   6   9   7762.09   9347.42    900.70 o
      3760    1  -2   6   9    169.67    824.77    405.84 <
      3761    3   2   8   8   1419.15   2071.09    505.34 o
      3761    2  -1   8   5   1419.15   2071.09    505.34 o
      3761    1  -1   6   9   1419.15   2071.09    505.34 o
      3762    1   0   6   9     24.58    -57.60    280.16 <
      3763    3   1   8   5    856.33    560.32    295.87 <
      3763    2  -2   6   6    856.33    560.32    295.87 <
      3763    1   1   6   9    856.33    560.32    295.87 <
      3764    1   2   6   9     15.11     20.95    272.31 <
      3765    3   0   8   2  16843.50  18480.10    979.25 o
      3765    2  -3   4   7  16843.50  18480.10    979.25 o
      3765    1   3   6   9  16843.50  18480.10    979.25 o
      3766    1   4   6   9      8.48    183.28    267.07 <
      3767    3  -1   8  -1  20427.60  20870.70   1078.75 o
      3767    2  -4   2   8  20427.60  20870.70   1078.75 o
      3767    1   5   6   9  20427.60  20870.70   1078.75 o
      3768    1   6   6   9    226.74    565.56    343.00 <
      3769    3  -2   8  -4  16487.20  16388.10   1552.67 o
      3769    2  -5   0   9  16487.20  16388.10   1552.67 o
      3769    1   7   6   9  16487.20  16388.10   1552.67 o
      3770    1   8   6   9      0.83    555.09    400.60 <
      3771    3  -3   8  -7  27125.90  27644.30   2390.53 o
      3771    2  -6  -2  10  27125.90  27644.30   2390.53 o
      3771    1   9   6   9  27125.90  27644.30   2390.53 o
      3772    1  10   6   9      7.72  -1235.85    424.17 <
      3773    1  -5   7   9      7.66   -429.40    476.54 <
      3774    1  -4   7   9    477.23    335.14    523.66 <
      3775    1  -3   7   9      4.94    754.08    487.01 <
      3776    1  -2   7   9     59.69    473.92    439.88 <
      3777    1  -1   7   9    267.96    487.01    439.88 <
      3778    1   0   7   9    736.22    840.48    319.44 <
      3779    1   1   7   9    352.95   -133.54    272.31 <
      3780    1   2   7   9      5.07    416.31    293.25 <
      3781    1   3   7   9    145.53    151.86    285.40 <
      3782    1   4   7   9    348.95    400.60    298.49 <
      3783    1   5   7   9    369.24    869.28    303.73 <
      3784    1   6   7   9    574.33   1065.66    403.22 <
      3785    1   7   7   9      1.16    253.98    329.91 <
      3786    1   8   7   9    149.62    -78.55    418.93 <
      3787    1   9   7   9    561.96   1275.12    633.63 <
      3788    1  10   7   9    229.93    397.98    557.70 <
      3789    1  -4   8   9    793.38    403.22    594.36 <
      3790    1  -3   8   9    511.48    282.78    505.34 <
      3791    1  -2   8   9    159.85    -81.17    458.21 <
      3792    1  -1   8   9    931.99   1623.36    487.01 o
      3793    1   0   8   9     93.53    518.43    466.06 <
      3794    1   1   8   9    604.14    869.28    348.24 <
      3795    1   2   8   9   1063.57    521.05    311.58 <
      3796    1   3   8   9   2605.33   2311.98    432.02 o
      3797    1   4   8   9      1.74    -44.51    293.25 <
      3798    1   5   8   9    146.45     52.37    293.25 <
      3799    1   6   8   9    271.43   -227.79    416.31 <
      3800    1   7   8   9    726.79   1227.99    649.34 <
      3801    1   8   8   9      2.24    253.98    507.95 <
      3802    1   9   8   9   1082.40   1610.27    649.34 <
      3803    1  10   8   9    341.96    434.64    523.66 <
      3804    3   2   9  15   1098.97   1086.60    691.24 <
      3804    2   2  13   7   1098.97   1086.60    691.24 <
      3804    1  -4   9   9   1098.97   1086.60    691.24 <
      3805    1  -3   9   9    295.10   -856.19    560.32 <
      3806    3   1   9  12    975.89    911.18    562.94 <
      3806    2   1  11   8    975.89    911.18    562.94 <
      3806    1  -2   9   9    975.89    911.18    562.94 <
      3807    1  -1   9   9     13.05   -400.60    432.02 <
      3808    3   0   9   9    629.27    892.85    594.36 <
      3808    2   0   9   9    629.27    892.85    594.36 <
      3808    1   0   9   9    629.27    892.85    594.36 <
      3809    1   1   9   9     66.31    107.35    397.98 <
      3810    3  -1   9   6   4259.27   4699.89    547.23 o
      3810    2  -1   7  10   4259.27   4699.89    547.23 o
      3810    1   2   9   9   4259.27   4699.89    547.23 o
      3811    1   3   9   9      0.50   -178.05    311.58 <
      3812    3  -2   9   3  17248.90  16948.40    979.25 o
      3812    2  -2   5  11  17248.90  16948.40    979.25 o
      3812    1   4   9   9  17248.90  16948.40    979.25 o
      3813    1   5   9   9     43.13    128.30    329.91 <
      3814    3  -3   9   0   1984.11   1790.93    502.72 o
      3814    2  -3   3  12   1984.11   1790.93    502.72 o
      3814    1   6   9   9   1984.11   1790.93    502.72 o
      3815    1   7   9   9      1.02   -426.79    468.68 <
      3816    3  -4   9  -3  11297.50  11840.10   1489.83 o
      3816    2  -4   1  13  11297.50  11840.10   1489.83 o
      3816    1   8   9   9  11297.50  11840.10   1489.83 o
      3817    1   9   9   9     51.62   -277.54    521.05 <
      3818    1  -3  10   9      0.10   -822.15    570.79 <
      3819    1  -2  10   9    370.53    183.28    521.05 <
      3820    1  -1  10   9     46.04   -534.14    531.52 <
      3821    1   0  10   9    112.18     -5.24    468.68 <
      3822    1   1  10   9    442.35    154.48    489.63 <
      3823    1   2  10   9    440.09   1125.88    610.07 <
      3824    1   3  10   9     95.43    -65.46    366.57 <
      3825    1   4  10   9     30.54    466.06    424.17 <
      3826    1   5  10   9    809.46    628.40    450.35 <
      3827    1   6  10   9      0.64    154.48    442.50 <
      3828    1   7  10   9    135.59    667.67    646.73 <
      3829    1   8  10   9     90.57    130.92    544.61 <
      3830    1   9  10   9     28.11    536.76    704.33 <
      3831    1  -1  11   9     59.65    521.05    586.51 <
      3832    1   0  11   9    583.02    824.77    604.83 <
      3833    1   1  11   9    298.29     99.50    581.27 <
      3834    1   2  11   9   1292.22   2401.00    751.46 o
      3835    1   3  11   9    254.66    596.98    638.87 <
      3836    1   4  11   9    975.81   1476.73    699.09 <
      3837    1   5  11   9     88.38    371.80    479.15 <
      3838    1   6  11   9    170.19    -83.79    429.40 <
      3839    1   7  11   9     86.05   1052.57    701.71 <
      3840    1   8  11   9   1308.74   1824.97    835.24 <
      3841    3  -2  10  10   1585.20   1733.33    803.83 <
      3841    2   1  10  13   1585.20   1733.33    803.83 <
      3841    1   1  12   9   1585.20   1733.33    803.83 <
      3842    1   2  12   9     88.01   -350.86    523.66 <
      3843    3  -3  10   7  10860.10   8001.60   1319.64 o
      3843    2   0   8  14  10860.10   8001.60   1319.64 o
      3843    1   3  12   9  10860.10   8001.60   1319.64 o
      3844    1   4  12   9     38.73   1015.91    722.66 <
      3845    3  -4  10   4   6632.36   4223.36   1055.18 o
      3845    2  -1   6  15   6632.36   4223.36   1055.18 o
      3845    1   5  12   9   6632.36   4223.36   1055.18 o
      3846    1   6  12   9      0.05   -201.61    487.01 <
      3847    1  -3  -9  10    372.33    157.10    688.62 <
      3848    1  -2  -9  10    984.38     96.88    610.07 <
      3849    1  -1  -9  10    275.89   1081.37    683.38 <
      3850    1   0  -9  10      9.62    -96.88    521.05 <
      3851    1   1  -9  10    166.85    146.63    526.28 <
      3852    1  -5  -8  10     30.30   -384.89    722.66 <
      3853    3  11   4   1   8372.55   8119.42   1353.67 o
      3853    2  -7   2 -13   8372.55   8119.42   1353.67 o
      3853    1  -4  -8  10   8372.55   8119.42   1353.67 o
      3854    1  -3  -8  10     39.68   1217.52    764.55 <
      3855    3  10   4  -2   3539.14   1570.99    725.28 <
      3855    2  -8   0 -12   3539.14   1570.99    725.28 <
      3855    1  -2  -8  10   3539.14   1570.99    725.28 <
      3856    1  -1  -8  10     19.99    125.68    507.95 <
      3857    3   9   4  -5   4178.23   3686.60    756.70 o
      3857    2  -9  -2 -11   4178.23   3686.60    756.70 o
      3857    1   0  -8  10   4178.23   3686.60    756.70 o
      3858    1   1  -8  10     60.02    146.63    424.17 <
      3859    3   8   4  -8   1941.36   1374.62    484.39 <
      3859    2 -10  -4 -10   1941.36   1374.62    484.39 <
      3859    1   2  -8  10   1941.36   1374.62    484.39 <
      3860    1   3  -8  10     26.71    801.21    722.66 <
      3861    1  -6  -7  10    304.11   -725.28    701.71 <
      3862    1  -5  -7  10      1.64    -26.18    727.89 <
      3863    1  -4  -7  10   1421.14   2398.38    830.01 <
      3864    1  -3  -7  10    338.25    947.83    607.45 <
      3865    1  -2  -7  10    194.27    -26.18    484.39 <
      3866    1  -1  -7  10      6.15    544.61    534.14 <
      3867    1   0  -7  10    308.42     94.26    481.77 <
      3868    1   1  -7  10     23.92    219.94    387.51 <
      3869    1   2  -7  10    385.40     83.79    353.47 <
      3870    1   3  -7  10    947.04   2018.73    672.91 <
      3871    1   4  -7  10    342.64   2196.77    665.05 o
      3872    1   5  -7  10    382.59    233.03    379.66 <
      3873    1  -6  -6  10    203.33    591.74    568.18 <
      3874    1  -5  -6  10    146.06   -217.32    633.63 <
      3875    1  -4  -6  10     30.60    350.86    596.98 <
      3876    1  -3  -6  10    975.37   1159.92    659.82 <
      3877    1  -2  -6  10    157.92   -146.63    578.65 <
      3878    1  -1  -6  10   1698.69   1741.19    576.03 o
      3879    1   0  -6  10      6.38    788.11    374.42 <
      3880    1   1  -6  10    450.72    589.12    377.04 <
      3881    1   2  -6  10      8.60    594.36    353.47 <
      3882    1   3  -6  10      0.99   -230.41    282.78 <
      3883    1   4  -6  10    129.51    -83.79    327.29 <
      3884    1   5  -6  10    320.04    185.90    306.34 <
      3885    1   6  -6  10      7.08    497.48    314.20 <
      3886    3  11   5   8  19142.80  18909.50   2034.44 o
      3886    2  -4   7 -11  19142.80  18909.50   2034.44 o
      3886    1  -7  -5  10  19142.80  18909.50   2034.44 o
      3887    1  -6  -5  10    169.65    387.51    479.15 <
      3888    3  10   5   5  22777.80  22119.60   1539.57 o
      3888    2  -5   5 -10  22777.80  22119.60   1539.57 o
      3888    1  -5  -5  10  22777.80  22119.60   1539.57 o
      3889    1  -4  -5  10    275.27    141.39    397.98 <
      3890    3   9   5   2   6392.35   7697.87   1222.76 o
      3890    2  -6   3  -9   6392.35   7697.87   1222.76 o
      3890    1  -3  -5  10   6392.35   7697.87   1222.76 o
      3891    1  -2  -5  10     20.77    230.41    560.32 <
      3892    3   8   5  -1  10856.80  12895.20   1510.77 o
      3892    2  -7   1  -8  10856.80  12895.20   1510.77 o
      3892    1  -1  -5  10  10856.80  12895.20   1510.77 o
      3893    1   0  -5  10      0.65   -191.14    308.96 <
      3894    3   7   5  -4   8520.42   9604.01    795.97 o
      3894    2  -8  -1  -7   8520.42   9604.01    795.97 o
      3894    1   1  -5  10   8520.42   9604.01    795.97 o
      3895    1   2  -5  10      1.91     57.60    277.54 <
      3896    3   6   5  -7  15085.90  14607.60    751.46 o
      3896    2  -9  -3  -6  15085.90  14607.60    751.46 o
      3896    1   3  -5  10  15085.90  14607.60    751.46 o
      3897    1   4  -5  10      5.35   -277.54    269.69 <
      3898    3   5   5 -10  19974.20  19396.50   1141.59 o
      3898    2 -10  -5  -5  19974.20  19396.50   1141.59 o
      3898    1   5  -5  10  19974.20  19396.50   1141.59 o
      3899    1   6  -5  10    616.26    806.44    290.63 <
      3900    3   4   5 -13   9381.42   9624.96    534.14 o
      3900    2 -11  -7  -4   9381.42   9624.96    534.14 o
      3900    1   7  -5  10   9381.42   9624.96    534.14 o
      3901    1  -7  -4  10    156.75    515.81    712.18 <
      3902    1  -6  -4  10      9.93    366.57    636.25 <
      3903    1  -5  -4  10    633.47    416.31    468.68 <
      3904    1  -4  -4  10    118.87    604.83    421.55 <
      3905    1  -3  -4  10   1346.74   1835.45    507.95 o
      3906    1  -2  -4  10     14.79   -204.23    510.57 <
      3907    1  -1  -4  10      4.85   -233.03    382.27 <
      3908    1   0  -4  10    335.62   1034.24    324.67 o
      3909    1   1  -4  10    976.30   1372.00    361.33 o
      3910    1   2  -4  10    185.97    198.99    212.08 <
      3911    1   3  -4  10    196.08     73.31    198.99 <
      3912    1   4  -4  10    340.01    204.23    246.12 <
      3913    1   5  -4  10    235.43    487.01    259.21 <
      3914    1   6  -4  10      0.03     23.56    233.03 <
      3915    1   7  -4  10     33.99    225.18    288.02 <
      3916    1  -7  -3  10    118.76  -1094.46    528.90 <
      3917    1  -6  -3  10    927.35   2118.22    667.67 o
      3918    1  -5  -3  10    194.96     89.02    447.73 <
      3919    1  -4  -3  10    159.86    -10.47    400.60 <
      3920    1  -3  -3  10     24.48   -151.86    343.00 <
      3921    1  -2  -3  10   3920.13   4720.84    594.36 o
      3922    1  -1  -3  10     47.13    767.17    539.38 <
      3923    1   0  -3  10    373.80    764.55    298.49 <
      3924    1   1  -3  10     17.87    -62.84    233.03 <
      3925    1   2  -3  10    719.06    625.78    214.70 <
      3926    1   3  -3  10     32.01    -18.33    175.43 <
      3927    1   4  -3  10    893.01    473.92    193.76 <
      3928    1   5  -3  10     74.16    235.65    188.52 <
      3929    1   6  -3  10     66.52      2.62    243.50 <
      3930    1   7  -3  10     10.27    162.34    264.45 <
      3931    1   8  -3  10    718.60    782.88    322.05 <
      3932    1  -7  -2  10      0.87    518.43    631.02 <
      3933    3   9   6   9  29843.60  31488.00   2751.86 o
      3933    2  -3   8  -7  29843.60  31488.00   2751.86 o
      3933    1  -6  -2  10  29843.60  31488.00   2751.86 o
      3934    1  -5  -2  10      6.28    112.59    408.46 <
      3935    3   8   6   6   4294.41   4867.46    662.44 o
      3935    2  -4   6  -6   4294.41   4867.46    662.44 o
      3935    1  -4  -2  10   4294.41   4867.46    662.44 o
      3936    1  -3  -2  10    437.89    206.85    329.91 <
      3937    3   7   6   3   2322.72   2071.09    442.50 o
      3937    2  -5   4  -5   2322.72   2071.09    442.50 o
      3937    1  -2  -2  10   2322.72   2071.09    442.50 o
      3938    1  -1  -2  10      1.57   -104.73    285.40 <
      3939    3   6   6   0  10903.50  10455.00    620.54 o
      3939    2  -6   2  -4  10903.50  10455.00    620.54 o
      3939    1   0  -2  10  10903.50  10455.00    620.54 o
      3940    1   1  -2  10     98.90    484.39    261.83 <
      3941    3   5   6  -3   5610.62   6629.60    418.93 o
      3941    2  -7   0  -3   5610.62   6629.60    418.93 o
      3941    1   2  -2  10   5610.62   6629.60    418.93 o
      3942    1   3  -2  10     78.93     52.37    167.57 <
      3943    3   4   6  -6  28281.10  25350.60   1146.83 o
      3943    2  -8  -2  -2  28281.10  25350.60   1146.83 o
      3943    1   4  -2  10  28281.10  25350.60   1146.83 o
      3944    1   5  -2  10    139.88   -243.50    227.79 <
      3945    3   3   6  -9  32993.00  34074.90   1814.50 o
      3945    2  -9  -4  -1  32993.00  34074.90   1814.50 o
      3945    1   6  -2  10  32993.00  34074.90   1814.50 o
      3946    1   7  -2  10    304.45    -20.95    274.92 <
      3947    3   2   6 -12  13016.40  14547.40    890.23 o
      3947    2 -10  -6   0  13016.40  14547.40    890.23 o
      3947    1   8  -2  10  13016.40  14547.40    890.23 o
      3948    1   9  -2  10    215.15     83.79    369.18 <
      3949    1  -7  -1  10    519.89    411.08    638.87 <
      3950    1  -6  -1  10     62.97    261.83    594.36 <
      3951    1  -5  -1  10     48.12    -49.75    301.11 <
      3952    1  -4  -1  10   1509.24   1230.61    314.20 o
      3953    1  -3  -1  10     13.13    109.97    227.79 <
      3954    1  -2  -1  10    257.96    225.18    329.91 <
      3955    1  -1  -1  10    621.07    476.54    301.11 <
      3956    1   0  -1  10    298.54    463.44    214.70 <
      3957    1   1  -1  10    505.93    259.21    233.03 <
      3958    1   2  -1  10    646.19    717.42    222.56 o
      3959    1   3  -1  10     97.19   -159.72    170.19 <
      3960    1   4  -1  10    414.07    466.06    196.37 <
      3961    1   5  -1  10    146.22    141.39    180.66 <
      3962    1   6  -1  10     27.19   -238.27    233.03 <
      3963    1   7  -1  10    378.87   -183.28    285.40 <
      3964    1   8  -1  10      1.24    -83.79    267.07 <
      3965    1   9  -1  10     20.12    500.10    345.62 <
      3966    1  -7   0  10   3163.12   1463.64    709.57 <
      3967    1  -6   0  10    677.03     81.17    408.46 <
      3968    1  -5   0  10    442.54    785.50    460.83 <
      3969    1  -4   0  10    293.76     83.79    251.36 <
      3970    1  -3   0  10   1002.47   1078.75    267.07 o
      3971    1  -2   0  10    281.75    285.40    230.41 <
      3972    1  -1   0  10   3462.95   3872.50    471.30 o
      3973    1   0   0  10   1794.24   1447.93    322.05 o
      3974    1   1   0  10    330.04    188.52    198.99 <
      3975    1   2   0  10     60.90    149.24    185.90 <
      3976    1   3   0  10      1.87    183.28    206.85 <
      3977    1   4   0  10     40.43   -146.63    172.81 <
      3978    1   5   0  10   1267.85   1186.10    214.70 o
      3979    1   6   0  10    502.66    356.09    172.81 <
      3980    1   7   0  10    970.81    997.58    243.50 o
      3981    1   8   0  10     14.88    350.86    311.58 <
      3982    1   9   0  10   1227.29    500.10    345.62 <
      3983    3   8   7  13  16093.40  12981.60   1060.42 o
      3983    2  -1  11  -4  16093.40  12981.60   1060.42 o
      3983    1  -7   1  10  16093.40  12981.60   1060.42 o
      3984    1  -6   1  10      5.18   -109.97    329.91 <
      3985    3   7   7  10  13829.50  14230.60    997.58 o
      3985    2  -2   9  -3  13829.50  14230.60    997.58 o
      3985    1  -5   1  10  13829.50  14230.60    997.58 o
      3986    1  -4   1  10    646.83    625.78    366.57 <
      3987    3   6   7   7    467.30    864.05    327.29 <
      3987    2  -3   7  -2    467.30    864.05    327.29 <
      3987    1  -3   1  10    467.30    864.05    327.29 <
      3988    1  -2   1  10    169.98    264.45    280.16 <
      3989    3   5   7   4  10704.50  10352.90    623.16 o
      3989    2  -4   5  -1  10704.50  10352.90    623.16 o
      3989    1  -1   1  10  10704.50  10352.90    623.16 o
      3990    1   0   1  10     49.91     39.27    214.70 <
      3991    3   4   7   1  37043.00  36447.10   1636.45 o
      3991    2  -5   3   0  37043.00  36447.10   1636.45 o
      3991    1   1   1  10  37043.00  36447.10   1636.45 o
      3992    1   2   1  10     26.76   -120.44    172.81 <
      3993    3   3   7  -2  34886.10  37284.90   1654.78 o
      3993    2  -6   1   1  34886.10  37284.90   1654.78 o
      3993    1   3   1  10  34886.10  37284.90   1654.78 o
      3994    1   4   1  10     80.69     15.71    172.81 <
      3995    3   2   7  -5  44824.10  44645.00   1730.71 o
      3995    2  -7  -1   2  44824.10  44645.00   1730.71 o
      3995    1   5   1  10  44824.10  44645.00   1730.71 o
      3996    1   6   1  10    429.48    442.50    201.61 <
      3997    3   1   7  -8  25026.50  26950.40    994.96 o
      3997    2  -8  -3   3  25026.50  26950.40    994.96 o
      3997    1   7   1  10  25026.50  26950.40    994.96 o
      3998    1   8   1  10     48.07    450.35    240.89 <
      3999    3   0   7 -11   3618.34   3437.86    411.08 o
      3999    2  -9  -5   4   3618.34   3437.86    411.08 o
      3999    1   9   1  10   3618.34   3437.86    411.08 o
      4000    1  10   1  10    194.46    157.10    390.13 <
      4001    1  -7   2  10     19.73   -128.30    405.84 <
      4002    1  -6   2  10    253.56    712.18    387.51 <
      4003    1  -5   2  10     17.17    180.66    332.53 <
      4004    1  -4   2  10      1.05   -225.18    303.73 <
      4005    1  -3   2  10    735.38    581.27    369.18 <
      4006    1  -2   2  10     70.40   -109.97    308.96 <
      4007    1  -1   2  10      7.17    657.20    337.76 <
      4008    1   0   2  10    123.32   -293.25    256.60 <
      4009    1   1   2  10    196.74    403.22    219.94 <
      4010    1   2   2  10    801.72     81.17    198.99 <
      4011    1   3   2  10      1.38    204.23    151.86 <
      4012    1   4   2  10      1.70    157.10    172.81 <
      4013    1   5   2  10    180.05      2.62    180.66 <
      4014    1   6   2  10     47.61    -96.88    175.43 <
      4015    1   7   2  10      2.38    363.95    209.47 <
      4016    1   8   2  10   1105.55    717.42    243.50 <
      4017    1   9   2  10    516.37    361.33    340.38 <
      4018    1  10   2  10    191.76    384.89    382.27 <
      4019    1  -7   3  10    156.47    607.45    439.88 <
      4020    1  -6   3  10   1016.29   1178.25    421.55 <
      4021    1  -5   3  10   1003.94    549.85    363.95 <
      4022    1  -4   3  10    588.97    599.60    452.97 <
      4023    1  -3   3  10    161.93    866.66    492.24 <
      4024    1  -2   3  10   2220.96   1916.61    439.88 o
      4025    1  -1   3  10   1106.44    987.11    366.57 <
      4026    1   0   3  10    972.03    264.45    316.82 <
      4027    1   1   3  10   1978.85   2364.35    426.79 o
      4028    1   2   3  10    314.58    397.98    214.70 <
      4029    1   3   3  10    333.34    473.92    191.14 <
      4030    1   4   3  10    720.31    526.28    225.18 <
      4031    1   5   3  10   1561.98   1618.12    227.79 o
      4032    1   6   3  10     16.94    217.32    180.66 <
      4033    1   7   3  10    336.26    439.88    240.89 <
      4034    1   8   3  10   1883.53   2644.51    374.42 o
      4035    1   9   3  10     29.56   -327.29    277.54 <
      4036    1  10   3  10   1183.24   1565.76    549.85 <
      4037    3   6   8  14   9868.01   9046.31    924.27 o
      4037    2   0  12   0   9868.01   9046.31    924.27 o
      4037    1  -6   4  10   9868.01   9046.31    924.27 o
      4038    1  -5   4  10     78.33    578.65    481.77 <
      4039    3   5   8  11    482.12    939.98    484.39 <
      4039    2  -1  10   1    482.12    939.98    484.39 <
      4039    1  -4   4  10    482.12    939.98    484.39 <
      4040    1  -3   4  10    363.92   1183.48    471.30 <
      4041    3   4   8   8   1174.14    555.09    350.86 <
      4041    2  -2   8   2   1174.14    555.09    350.86 <
      4041    1  -2   4  10   1174.14    555.09    350.86 <
      4042    1  -1   4  10     19.02      5.24    293.25 <
      4043    3   3   8   5   7089.21   9661.62    712.18 o
      4043    2  -3   6   3   7089.21   9661.62    712.18 o
      4043    1   0   4  10   7089.21   9661.62    712.18 o
      4044    1   1   4  10    118.15     44.51    274.92 <
      4045    3   2   8   2  18980.80  21339.30   1089.22 o
      4045    2  -4   4   4  18980.80  21339.30   1089.22 o
      4045    1   2   4  10  18980.80  21339.30   1089.22 o
      4046    1   3   4  10      3.81     39.27    198.99 <
      4047    3   1   8  -1  35409.70  34575.00   1392.95 o
      4047    2  -5   2   5  35409.70  34575.00   1392.95 o
      4047    1   4   4  10  35409.70  34575.00   1392.95 o
      4048    1   5   4  10     15.44    329.91    243.50 <
      4049    3   0   8  -4  35384.50  35792.50   1641.69 o
      4049    2  -6   0   6  35384.50  35792.50   1641.69 o
      4049    1   6   4  10  35384.50  35792.50   1641.69 o
      4050    1   7   4  10     58.41    115.21    274.92 <
      4051    3  -1   8  -7   6944.73   9046.31    764.55 o
      4051    2  -7  -2   7   6944.73   9046.31    764.55 o
      4051    1   8   4  10   6944.73   9046.31    764.55 o
      4052    1   9   4  10    440.54    295.87    308.96 <
      4053    3  -2   8 -10   1417.69   1324.87    421.55 o
      4053    2  -8  -4   8   1417.69   1324.87    421.55 o
      4053    1  10   4  10   1417.69   1324.87    421.55 o
      4054    1  -6   5  10    148.66    806.44    536.76 <
      4055    1  -5   5  10     13.24    481.77    612.69 <
      4056    1  -4   5  10    173.00    238.27    489.63 <
      4057    1  -3   5  10    329.78    594.36    468.68 <
      4058    1  -2   5  10    156.70   -240.89    445.11 <
      4059    1  -1   5  10    474.32    123.06    324.67 <
      4060    1   0   5  10    114.80    610.07    335.14 <
      4061    1   1   5  10    213.22    712.18    319.44 <
      4062    1   2   5  10     55.78    157.10    269.69 <
      4063    1   3   5  10    948.31    487.01    288.02 <
      4064    1   4   5  10    158.61    439.88    274.92 <
      4065    1   5   5  10     51.57    209.47    259.21 <
      4066    1   6   5  10   1011.18    149.24    251.36 <
      4067    1   7   5  10    472.98    764.55    308.96 <
      4068    1   8   5  10     29.74   -201.61    322.05 <
      4069    1   9   5  10    178.00    699.09    397.98 <
      4070    1  10   5  10    630.48   1055.18    455.59 <
      4071    1  -5   6  10    233.75     23.56    502.72 <
      4072    1  -4   6  10   1325.43   2215.10    727.89 o
      4073    1  -3   6  10    506.32    502.72    487.01 <
      4074    1  -2   6  10    617.41   1730.71    534.14 o
      4075    1  -1   6  10   1159.53    730.51    473.92 <
      4076    1   0   6  10   1759.46   2102.51    442.50 o
      4077    1   1   6  10     28.84   -136.15    272.31 <
      4078    1   2   6  10    521.29   1259.41    353.47 o
      4079    1   3   6  10     16.08     94.26    256.60 <
      4080    1   4   6  10    840.95   1230.61    332.53 o
      4081    1   5   6  10    631.77    879.76    369.18 <
      4082    1   6   6  10   1787.63   2086.80    458.21 o
      4083    1   7   6  10    690.25   1466.26    583.89 <
      4084    1   8   6  10      5.02   -196.37    408.46 <
      4085    1   9   6  10   2058.79   2335.54    651.96 o
      4086    1  10   6  10    414.94    981.87    623.16 <
      4087    3   4   9  15    430.44   -437.26    604.83 <
      4087    2   1  13   4    430.44   -437.26    604.83 <
      4087    1  -5   7  10    430.44   -437.26    604.83 <
      4088    1  -4   7  10    215.30    633.63    557.70 <
      4089    3   3   9  12   1592.08   1133.73    636.25 <
      4089    2   0  11   5   1592.08   1133.73    636.25 <
      4089    1  -3   7  10   1592.08   1133.73    636.25 <
      4090    1  -2   7  10    119.22    272.31    471.30 <
      4091    3   2   9   9   4245.58   5205.23    727.89 o
      4091    2  -1   9   6   4245.58   5205.23    727.89 o
      4091    1  -1   7  10   4245.58   5205.23    727.89 o
      4092    1   0   7  10     74.28    193.76    358.71 <
      4093    3   1   9   6  19417.80  22732.30   1204.43 o
      4093    2  -2   7   7  19417.80  22732.30   1204.43 o
      4093    1   1   7  10  19417.80  22732.30   1204.43 o
      4094    1   2   7  10     10.21     70.69    295.87 <
      4095    3   0   9   3  13170.50  14162.50    843.10 o
      4095    2  -3   5   8  13170.50  14162.50    843.10 o
      4095    1   3   7  10  13170.50  14162.50    843.10 o
      4096    1   4   7  10     20.64     91.64    290.63 <
      4097    3  -1   9   0  28877.40  26193.70   1335.35 o
      4097    2  -4   3   9  28877.40  26193.70   1335.35 o
      4097    1   5   7  10  28877.40  26193.70   1335.35 o
      4098    1   6   7  10     33.69    -78.55    366.57 <
      4099    3  -2   9  -3  12948.40  12774.80   1374.62 o
      4099    2  -5   1  10  12948.40  12774.80   1374.62 o
      4099    1   7   7  10  12948.40  12774.80   1374.62 o
      4100    1   8   7  10    106.48    866.66    557.70 <
      4101    3  -3   9  -6    239.82    541.99    526.28 <
      4101    2  -6  -1  11    239.82    541.99    526.28 <
      4101    1   9   7  10    239.82    541.99    526.28 <
      4102    1  10   7  10    129.56   -324.67    487.01 <
      4103    1  -4   8  10     60.23   -384.89    604.83 <
      4104    1  -3   8  10     56.55   -164.95    534.14 <
      4105    1  -2   8  10    113.46    481.77    539.38 <
      4106    1  -1   8  10    194.46     41.89    602.21 <
      4107    1   0   8  10      3.09    204.23    468.68 <
      4108    1   1   8  10     62.94    379.66    329.91 <
      4109    1   2   8  10    382.50    895.47    377.04 <
      4110    1   3   8  10     12.08    102.11    316.82 <
      4111    1   4   8  10    273.01     57.60    332.53 <
      4112    1   5   8  10    654.08    374.42    343.00 <
      4113    1   6   8  10    110.78    942.60    434.64 <
      4114    1   7   8  10     12.42   -290.63    460.83 <
      4115    1   8   8  10   1068.54   -167.57    539.38 <
      4116    1   9   8  10    122.23    112.59    573.41 <
      4117    1  10   8  10     20.48     52.37    589.12 <
      4118    1  -3   9  10    783.59   1141.59    638.87 <
      4119    1  -2   9  10    218.87   -426.79    416.31 <
      4120    1  -1   9  10    737.44     39.27    531.52 <
      4121    1   0   9  10    391.23   1097.08    631.02 <
      4122    1   1   9  10   1369.15    644.11    539.38 <
      4123    1   2   9  10      6.35    251.36    403.22 <
      4124    1   3   9  10    471.38   1591.94    437.26 o
      4125    1   4   9  10    240.17    484.39    337.76 <
      4126    1   5   9  10   2229.38   2377.44    471.30 o
      4127    1   6   9  10     58.80    507.95    473.92 <
      4128    1   7   9  10    689.64    672.91    623.16 <
      4129    1   8   9  10   1459.03    932.12    657.20 <
      4130    1   9   9  10     27.16     68.08    539.38 <
      4131    3   1  10  13   1563.21   1466.26    654.58 <
      4131    2   1  12   9   1563.21   1466.26    654.58 <
      4131    1  -2  10  10   1563.21   1466.26    654.58 <
      4132    1  -1  10  10    107.73    120.44    589.12 <
      4133    3   0  10  10   8985.35   8025.16   1256.80 o
      4133    2   0  10  10   8985.35   8025.16   1256.80 o
      4133    1   0  10  10   8985.35   8025.16   1256.80 o
      4134    1   1  10  10     28.18   -175.43    539.38 <
      4135    3  -1  10   7   8124.07   7438.66   1170.39 o
      4135    2  -1   8  11   8124.07   7438.66   1170.39 o
      4135    1   2  10  10   8124.07   7438.66   1170.39 o
      4136    1   3  10  10      3.89    926.89    646.73 <
      4137    3  -2  10   4   1852.80   1667.87    505.34 o
      4137    2  -2   6  12   1852.80   1667.87    505.34 o
      4137    1   4  10  10   1852.80   1667.87    505.34 o
      4138    1   5  10  10     89.16    -31.42    416.31 <
      4139    3  -3  10   1   8349.49   8826.37   1337.96 o
      4139    2  -3   4  13   8349.49   8826.37   1337.96 o
      4139    1   6  10  10   8349.49   8826.37   1337.96 o
      4140    1   7  10  10     50.81  -1049.95    468.68 <
      4141    3  -4  10  -2    845.70   1112.79    644.11 <
      4141    2  -4   2  14    845.70   1112.79    644.11 <
      4141    1   8  10  10    845.70   1112.79    644.11 <
      4142    1  -1  11  10     99.03    151.86    596.98 <
      4143    1   0  11  10     90.74   -555.09    547.23 <
      4144    1   1  11  10     18.78    699.09    610.07 <
      4145    1   2  11  10    349.53    531.52    620.54 <
      4146    1   3  11  10    260.95    146.63    547.23 <
      4147    1   4  11  10    538.97     26.18    641.49 <
      4148    1   5  11  10     20.57     65.46    452.97 <
      4149    1   6  11  10    267.88     60.22    644.11 <
      4150    1   7  11  10    264.59   -476.54    599.60 <
      4151    1   2  12  10    282.37    560.32    759.31 <
      4152    1   3  12  10      2.13    437.26    665.05 <
      4153    1   4  12  10    496.19   -696.47    631.02 <
      4154    1   5  12  10     72.11   -198.99    654.58 <
      4155    1   6  12  10   1402.17   1018.53    631.02 <
      4156    1  -3  -8  11      2.01    604.83    751.46 <
      4157    1  -2  -8  11      6.78    536.76    607.45 <
      4158    1  -1  -8  11      4.23    -81.17    531.52 <
      4159    1   0  -8  11    112.96   -387.51    481.77 <
      4160    1   1  -8  11     24.84   -662.44    466.06 <
      4161    1   2  -8  11    278.01   -136.15    418.93 <
      4162    3  11   5   2   4221.01   4650.14   1097.08 o
      4162    2  -7   3 -12   4221.01   4650.14   1097.08 o
      4162    1  -4  -7  11   4221.01   4650.14   1097.08 o
      4163    1  -3  -7  11     50.24   -557.70    573.41 <
      4164    3  10   5  -1   5180.91   4948.63    989.73 o
      4164    2  -8   1 -11   5180.91   4948.63    989.73 o
      4164    1  -2  -7  11   5180.91   4948.63    989.73 o
      4165    1  -1  -7  11     26.39    188.52    526.28 <
      4166    3   9   5  -4   4929.63   2791.13    759.31 o
      4166    2  -9  -1 -10   4929.63   2791.13    759.31 o
      4166    1   0  -7  11   4929.63   2791.13    759.31 o
      4167    1   1  -7  11      9.74   -159.72    434.64 <
      4168    3   8   5  -7  18463.70  19352.00   1246.32 o
      4168    2 -10  -3  -9  18463.70  19352.00   1246.32 o
      4168    1   2  -7  11  18463.70  19352.00   1246.32 o
      4169    1   3  -7  11    287.97     62.84    699.09 <
      4170    3   7   5 -10  15221.20  17393.50   1641.69 o
      4170    2 -11  -5  -8  15221.20  17393.50   1641.69 o
      4170    1   4  -7  11  15221.20  17393.50   1641.69 o
      4171    1  -5  -6  11     34.17    -41.89    641.49 <
      4172    1  -4  -6  11    667.88   1013.29    717.42 <
      4173    1  -3  -6  11     19.66    411.08    612.69 <
      4174    1  -2  -6  11   1453.94   2874.92    801.21 o
      4175    1  -1  -6  11   1023.79    900.70    612.69 <
      4176    1   0  -6  11    226.62    479.15    476.54 <
      4177    1   1  -6  11    599.03    678.15    384.89 <
      4178    1   2  -6  11     14.47      0.00    356.09 <
      4179    1   3  -6  11    187.23    259.21    329.91 <
      4180    1   4  -6  11    593.58   -225.18    547.23 <
      4181    1   5  -6  11     63.60    570.79    348.24 <
      4182    1  -6  -5  11      0.27   -654.58    492.24 <
      4183    1  -5  -5  11   3973.78   6681.96    898.09 o
      4184    1  -4  -5  11     80.83     75.93    625.78 <
      4185    1  -3  -5  11    764.03    -83.79    596.98 <
      4186    1  -2  -5  11     45.32     78.55    534.14 <
      4187    1  -1  -5  11     61.72   -308.96    418.93 <
      4188    1   0  -5  11     10.61   -460.83    413.70 <
      4189    1   1  -5  11   1194.98   1049.95    395.37 <
      4190    1   2  -5  11      6.05   -327.29    308.96 <
      4191    1   3  -5  11      7.33    596.98    337.76 <
      4192    1   4  -5  11     10.67    251.36    306.34 <
      4193    1   5  -5  11    721.33    631.02    332.53 <
      4194    1   6  -5  11    182.07    704.33    264.45 <
      4195    1  -6  -4  11    554.15   1094.46    743.60 <
      4196    3  10   6   6   5585.45   6352.05    879.76 o
      4196    2  -5   6  -9   5585.45   6352.05    879.76 o
      4196    1  -5  -4  11   5585.45   6352.05    879.76 o
      4197    1  -4  -4  11      0.88     57.60    445.11 <
      4198    3   9   6   3  16047.40  14921.80   1602.41 o
      4198    2  -6   4  -8  16047.40  14921.80   1602.41 o
      4198    1  -3  -4  11  16047.40  14921.80   1602.41 o
      4199    1  -2  -4  11      0.26   -343.00    487.01 <
      4200    3   8   6   0   4691.80   5891.23    992.34 o
      4200    2  -7   2  -7   4691.80   5891.23    992.34 o
      4200    1  -1  -4  11   4691.80   5891.23    992.34 o
      4201    1   0  -4  11      3.53     60.22    429.40 <
      4202    3   7   6  -3  13665.00  12845.50    879.76 o
      4202    2  -8   0  -6  13665.00  12845.50    879.76 o
      4202    1   1  -4  11  13665.00  12845.50    879.76 o
      4203    1   2  -4  11     72.22    -44.51    295.87 <
      4204    3   6   6  -6  33585.20  32988.30   1840.68 o
      4204    2  -9  -2  -5  33585.20  32988.30   1840.68 o
      4204    1   3  -4  11  33585.20  32988.30   1840.68 o
      4205    1   4  -4  11    403.25    -41.89    206.85 <
      4206    3   5   6  -9  10941.80   9721.84    576.03 o
      4206    2 -10  -4  -4  10941.80   9721.84    576.03 o
      4206    1   5  -4  11  10941.80   9721.84    576.03 o
      4207    1   6  -4  11     86.31    164.95    335.14 <
      4208    3   4   6 -12   5346.35   5687.00    555.09 o
      4208    2 -11  -6  -3   5346.35   5687.00    555.09 o
      4208    1   7  -4  11   5346.35   5687.00    555.09 o
      4209    1  -7  -3  11    454.92   1104.93    738.37 <
      4210    1  -6  -3  11      6.66    413.70    623.16 <
      4211    1  -5  -3  11    829.20    599.60    479.15 <
      4212    1  -4  -3  11    332.65    298.49    426.79 <
      4213    1  -3  -3  11    412.83    628.40    434.64 <
      4214    1  -2  -3  11     87.95    335.14    515.81 <
      4215    1  -1  -3  11   1590.71   1989.93    646.73 o
      4216    1   0  -3  11    749.58    835.24    353.47 <
      4217    1   1  -3  11     52.89    -20.95    261.83 <
      4218    1   2  -3  11      3.68   -455.59    253.98 <
      4219    1   3  -3  11    167.66    144.01    201.61 <
      4220    1   4  -3  11    635.78    751.46    209.47 o
      4221    1   5  -3  11    504.52   1186.10    340.38 o
      4222    1   6  -3  11     86.48     34.04    295.87 <
      4223    1   7  -3  11    178.46    476.54    314.20 <
      4224    1   8  -3  11    289.35    345.62    350.86 <
      4225    1  -7  -2  11     42.58    240.89    636.25 <
      4226    1  -6  -2  11   1783.72   1175.63    727.89 <
      4227    1  -5  -2  11    133.72   1269.89    487.01 <
      4228    1  -4  -2  11   4540.49   5980.25    738.37 o
      4229    1  -3  -2  11   1674.57    644.11    413.70 <
      4230    1  -2  -2  11      5.82   -259.21    348.24 <
      4231    1  -1  -2  11    292.21    384.89    345.62 <
      4232    1   0  -2  11    221.97    429.40    460.83 <
      4233    1   1  -2  11     49.53    -75.93    261.83 <
      4234    1   2  -2  11   1582.36   1565.76    343.00 o
      4235    1   3  -2  11    407.94   1010.67    256.60 o
      4236    1   4  -2  11   1067.28   1353.67    256.60 o
      4237    1   5  -2  11      0.49   -141.39    261.83 <
      4238    1   6  -2  11    364.04    620.54    303.73 <
      4239    1   7  -2  11     31.42    -70.69    301.11 <
      4240    1   8  -2  11     24.71    397.98    343.00 <
      4241    3   9   7  10    172.64    696.47    646.73 <
      4241    2  -3   9  -6    172.64    696.47    646.73 <
      4241    1  -6  -1  11    172.64    696.47    646.73 <
      4242    1  -5  -1  11    493.05    193.76    539.38 <
      4243    3   8   7   7   5464.19   6158.30    769.79 o
      4243    2  -4   7  -5   5464.19   6158.30    769.79 o
      4243    1  -4  -1  11   5464.19   6158.30    769.79 o
      4244    1  -3  -1  11      8.68    573.41    395.37 <
      4245    3   7   7   4  23907.60  27777.80   1691.44 o
      4245    2  -5   5  -4  23907.60  27777.80   1691.44 o
      4245    1  -2  -1  11  23907.60  27777.80   1691.44 o
      4246    1  -1  -1  11    250.51   -238.27    319.44 <
      4247    3   6   7   1  10222.70  10504.70    830.01 o
      4247    2  -6   3  -3  10222.70  10504.70    830.01 o
      4247    1   0  -1  11  10222.70  10504.70    830.01 o
      4248    1   1  -1  11      0.90    -78.55    259.21 <
      4249    3   5   7  -2  50950.30  47407.40   2555.48 o
      4249    2  -7   1  -2  50950.30  47407.40   2555.48 o
      4249    1   2  -1  11  50950.30  47407.40   2555.48 o
      4250    1   3  -1  11    329.32     65.46    201.61 <
      4251    3   4   7  -5  37357.80  36143.30   1605.03 o
      4251    2  -8  -1  -1  37357.80  36143.30   1605.03 o
      4251    1   4  -1  11  37357.80  36143.30   1605.03 o
      4252    1   5  -1  11      9.07    306.34    214.70 <
      4253    3   3   7  -8  14074.80  14427.00    911.18 o
      4253    2  -9  -3   0  14074.80  14427.00    911.18 o
      4253    1   6  -1  11  14074.80  14427.00    911.18 o
      4254    1   7  -1  11    148.03   -327.29    282.78 <
      4255    3   2   7 -11   4792.36   2922.05    445.11 o
      4255    2 -10  -5   1   4792.36   2922.05    445.11 o
      4255    1   8  -1  11   4792.36   2922.05    445.11 o
      4256    1   9  -1  11    190.74    319.44    384.89 <
      4257    1  -7   0  11      7.27    987.11    604.83 <
      4258    1  -4   0  11    335.10   -246.12    562.94 <
      4259    1  -3   0  11     63.92   -500.10    502.72 <
      4260    1  -2   0  11    826.26    665.05    560.32 <
      4261    1  -1   0  11     11.05    -57.60    450.35 <
      4262    1   0   0  11    496.86    437.26    434.64 <
      4263    1   1   0  11     14.88    -47.13    233.03 <
      4264    1   2   0  11      4.05    429.40    272.31 <
      4265    1   3   0  11    393.39    513.19    238.27 <
      4266    1   4   0  11    581.15   1170.39    251.36 o
      4267    1   5   0  11    801.31    795.97    227.79 o
      4268    1   6   0  11    123.93    421.55    217.32 <
      4269    1   7   0  11     73.08    196.37    293.25 <
      4270    1   8   0  11     67.82    479.15    340.38 <
      4271    1   9   0  11     48.05    295.87    374.42 <
      4272    1  -7   1  11    726.03   1432.22    693.86 <
      4273    1  -6   1  11     50.36    479.15    612.69 <
      4274    1  -5   1  11   4013.64   3482.37    869.28 o
      4275    1  -4   1  11    769.87   2372.20    714.80 o
      4276    1  -3   1  11    831.47    913.79    293.25 o
      4277    1  -2   1  11   2318.18   2322.45    468.68 o
      4278    1  -1   1  11     51.88    274.92    308.96 <
      4279    1   0   1  11    147.54    293.25    308.96 <
      4280    1   1   1  11   1841.22   1547.43    282.78 o
      4281    1   2   1  11    475.98      5.24    256.60 <
      4282    1   3   1  11    112.12   -109.97    269.69 <
      4283    1   4   1  11    198.94    298.49    204.23 <
      4284    1   5   1  11   1363.69   1060.42    225.18 o
      4285    1   6   1  11     19.64    547.23    212.08 <
      4286    1   7   1  11     59.56   -298.49    225.18 <
      4287    1   8   1  11    235.05    620.54    322.05 <
      4288    1   9   1  11    330.72    371.80    384.89 <
      4289    1  -6   2  11   1020.30    395.37    397.98 <
      4290    3   7   8  11    230.68      5.24    371.80 <
      4290    2  -2  10  -2    230.68      5.24    371.80 <
      4290    1  -5   2  11    230.68      5.24    371.80 <
      4291    1  -4   2  11     43.83     52.37    332.53 <
      4292    3   6   8   8  19379.70  20106.10   1055.18 o
      4292    2  -3   8  -1  19379.70  20106.10   1055.18 o
      4292    1  -3   2  11  19379.70  20106.10   1055.18 o
      4293    1  -2   2  11     43.35    348.24    345.62 <
      4294    3   5   8   5  15127.20  14683.60   1023.76 o
      4294    2  -4   6   0  15127.20  14683.60   1023.76 o
      4294    1  -1   2  11  15127.20  14683.60   1023.76 o
      4295    1   0   2  11    156.41    178.05    293.25 <
      4296    3   4   8   2  24364.10  23787.50   1447.93 o
      4296    2  -5   4   1  24364.10  23787.50   1447.93 o
      4296    1   1   2  11  24364.10  23787.50   1447.93 o
      4297    1   2   2  11     11.34   -167.57    214.70 <
      4298    3   3   8  -1  33241.90  32448.90   1830.21 o
      4298    2  -6   2   2  33241.90  32448.90   1830.21 o
      4298    1   3   2  11  33241.90  32448.90   1830.21 o
      4299    1   4   2  11    257.61    -18.33    230.41 <
      4300    3   2   8  -4   4283.07   5393.75    460.83 o
      4300    2  -7   0   3   4283.07   5393.75    460.83 o
      4300    1   5   2  11   4283.07   5393.75    460.83 o
      4301    1   6   2  11    194.51    306.34    230.41 <
      4302    3   1   8  -7   4972.24   4919.83    471.30 o
      4302    2  -8  -2   4   4972.24   4919.83    471.30 o
      4302    1   7   2  11   4972.24   4919.83    471.30 o
      4303    1   8   2  11     18.06    117.82    272.31 <
      4304    3   0   8 -10   3799.13   3102.71    607.45 o
      4304    2  -9  -4   5   3799.13   3102.71    607.45 o
      4304    1   9   2  11   3799.13   3102.71    607.45 o
      4305    1  10   2  11      2.79   -397.98    460.83 <
      4306    1  -6   3  11     11.87   -175.43    397.98 <
      4307    1  -5   3  11    250.57    497.48    418.93 <
      4308    1  -4   3  11    413.50    -49.75    335.14 <
      4309    1  -3   3  11      4.65    337.76    526.28 <
      4310    1  -2   3  11      7.07     73.31    377.04 <
      4311    1  -1   3  11    644.96   -107.35    335.14 <
      4312    1   0   3  11    192.20    280.16    358.71 <
      4313    1   1   3  11      5.59     39.27    314.20 <
      4314    1   2   3  11    537.57    625.78    345.62 <
      4315    1   3   3  11    721.68    759.31    219.94 o
      4316    1   4   3  11   1053.33   1411.28    277.54 o
      4317    1   5   3  11     44.88    -83.79    209.47 <
      4318    1   6   3  11    342.15    418.93    230.41 <
      4319    1   7   3  11    451.18    646.73    293.25 <
      4320    1   8   3  11    198.88   -102.11    280.16 <
      4321    1   9   3  11     24.60   -212.08    280.16 <
      4322    1  10   3  11    107.63    214.70    526.28 <
      4323    1  -6   4  11   1572.88    963.54    473.92 <
      4324    1  -5   4  11    213.62    411.08    413.70 <
      4325    1  -4   4  11   2798.39   4532.32    947.83 o
      4326    1  -3   4  11   2444.66   2728.29    578.65 o
      4327    1  -2   4  11      3.13    219.94    327.29 <
      4328    1  -1   4  11   1514.85   2581.67    455.59 o
      4329    1   0   4  11    156.70    230.41    316.82 <
      4330    1   1   4  11    863.75   1144.21    345.62 o
      4331    1   2   4  11   1055.73    939.98    314.20 <
      4332    1   3   4  11   1440.19   1335.35    361.33 o
      4333    1   4   4  11    626.31    322.05    227.79 <
      4334    1   5   4  11     14.28     57.60    219.94 <
      4335    1   6   4  11    505.80    322.05    233.03 <
      4336    1   7   4  11    443.03    701.71    288.02 <
      4337    1   8   4  11      0.02   -353.47    277.54 <
      4338    1   9   4  11    384.70    -47.13    337.76 <
      4339    1  10   4  11    207.42   -109.97    366.57 <
      4340    1  -5   5  11    360.71    536.76    672.91 <
      4341    3   5   9  12   3245.60   3550.45    945.22 o
      4341    2  -1  11   2   3245.60   3550.45    945.22 o
      4341    1  -4   5  11   3245.60   3550.45    945.22 o
      4342    1  -3   5  11     10.56    843.10    589.12 <
      4343    3   4   9   9  17131.40  19030.00   1358.91 o
      4343    2  -2   9   3  17131.40  19030.00   1358.91 o
      4343    1  -2   5  11  17131.40  19030.00   1358.91 o
      4344    1  -1   5  11    273.84    235.65    377.04 <
      4345    3   3   9   6   5500.30   6247.32    604.83 o
      4345    2  -3   7   4   5500.30   6247.32    604.83 o
      4345    1   0   5  11   5500.30   6247.32    604.83 o
      4346    1   1   5  11     74.54   -235.65    322.05 <
      4347    3   2   9   3  39661.40  41699.40   1968.98 o
      4347    2  -4   5   5  39661.40  41699.40   1968.98 o
      4347    1   2   5  11  39661.40  41699.40   1968.98 o
      4348    1   3   5  11     99.08    219.94    308.96 <
      4349    3   1   9   0  18281.30  20056.40   1309.16 o
      4349    2  -5   3   6  18281.30  20056.40   1309.16 o
      4349    1   4   5  11  18281.30  20056.40   1309.16 o
      4350    1   5   5  11      3.14   -311.58    335.14 <
      4351    3   0   9  -3    941.43   2021.35    445.11 o
      4351    2  -6   1   7    941.43   2021.35    445.11 o
      4351    1   6   5  11    941.43   2021.35    445.11 o
      4352    1   7   5  11    161.80    314.20    324.67 <
      4353    3  -1   9  -6   3219.78   2631.42    463.44 o
      4353    2  -7  -1   8   3219.78   2631.42    463.44 o
      4353    1   8   5  11   3219.78   2631.42    463.44 o
      4354    1   9   5  11      2.07    264.45    371.80 <
      4355    3  -2   9  -9   4970.88   5231.41    751.46 o
      4355    2  -8  -3   9   4970.88   5231.41    751.46 o
      4355    1  10   5  11   4970.88   5231.41    751.46 o
      4356    1  -5   6  11    158.41    324.67    589.12 <
      4357    1  -4   6  11     28.32   -432.02    581.27 <
      4358    1  -3   6  11     27.59   -261.83    636.25 <
      4359    1  -2   6  11     10.31     -7.85    610.07 <
      4360    1  -1   6  11      3.15    288.02    489.63 <
      4361    1   0   6  11     99.16    112.59    363.95 <
      4362    1   1   6  11    131.43    290.63    332.53 <
      4363    1   2   6  11    148.88   -356.09    311.58 <
      4364    1   3   6  11    128.58    120.44    306.34 <
      4365    1   4   6  11    131.10    806.44    327.29 <
      4366    1   5   6  11   1114.60   1094.46    455.59 <
      4367    1   6   6  11    130.48    272.31    358.71 <
      4368    1   7   6  11      3.04    979.25    481.77 <
      4369    1   8   6  11     58.27    290.63    476.54 <
      4370    1   9   6  11      2.29    678.15    476.54 <
      4371    1  10   6  11    297.97    130.92    570.79 <
      4372    1  -4   7  11    474.98    301.11    610.07 <
      4373    1  -3   7  11    387.33    395.37    620.54 <
      4374    1  -2   7  11   1521.88   3055.58    871.90 o
      4375    1  -1   7  11     46.22    125.68    594.36 <
      4376    1   0   7  11    455.77    573.41    439.88 <
      4377    1   1   7  11    508.56    596.98    353.47 <
      4378    1   2   7  11   1235.38   2319.83    434.64 o
      4379    1   3   7  11    147.34    144.01    322.05 <
      4380    1   4   7  11    839.59   1180.86    379.66 o
      4381    1   5   7  11    862.49    746.22    408.46 <
      4382    1   6   7  11    163.11    133.54    397.98 <
      4383    1   7   7  11     76.60    188.52    507.95 <
      4384    1   8   7  11   1419.00   2610.47    746.22 o
      4385    1   9   7  11     35.71     86.40    481.77 <
      4386    1  10   7  11    105.13    754.08    589.12 <
      4387    3   3  10  13  14203.80  12958.10   1610.27 o
      4387    2   0  12   6  14203.80  12958.10   1610.27 o
      4387    1  -3   8  11  14203.80  12958.10   1610.27 o
      4388    1  -2   8  11    110.98   -170.19    523.66 <
      4389    3   2  10  10   8645.95   7024.96   1125.88 o
      4389    2  -1  10   7   8645.95   7024.96   1125.88 o
      4389    1  -1   8  11   8645.95   7024.96   1125.88 o
      4390    1   0   8  11    119.75    377.04    515.81 <
      4391    3   1  10   7   1511.25    298.49    573.41 <
      4391    2  -2   8   8   1511.25    298.49    573.41 <
      4391    1   1   8  11   1511.25    298.49    573.41 <
      4392    1   2   8  11     70.49    814.30    374.42 <
      4393    3   0  10   4   7783.87  10536.10    806.44 o
      4393    2  -3   6   9   7783.87  10536.10    806.44 o
      4393    1   3   8  11   7783.87  10536.10    806.44 o
      4394    1   4   8  11     15.83     65.46    329.91 <
      4395    3  -1  10   1    297.97    746.22    439.88 <
      4395    2  -4   4  10    297.97    746.22    439.88 <
      4395    1   5   8  11    297.97    746.22    439.88 <
      4396    1   6   8  11    136.12     75.93    429.40 <
      4397    3  -2  10  -2     84.60   -319.44    534.14 <
      4397    2  -5   2  11     84.60   -319.44    534.14 <
      4397    1   7   8  11     84.60   -319.44    534.14 <
      4398    1   8   8  11     28.30   -500.10    497.48 <
      4399    3  -3  10  -5   3254.46   3118.42    822.15 o
      4399    2  -6   0  12   3254.46   3118.42    822.15 o
      4399    1   9   8  11   3254.46   3118.42    822.15 o
      4400    1  -2   9  11      1.24    615.31    596.98 <
      4401    1  -1   9  11     12.85    -91.64    500.10 <
      4402    1   0   9  11    425.83   1531.72    691.24 <
      4403    1   1   9  11    123.28    869.28    596.98 <
      4404    1   2   9  11    179.27    366.57    418.93 <
      4405    1   3   9  11    268.89    683.38    437.26 <
      4406    1   4   9  11    444.56    154.48    395.37 <
      4407    1   5   9  11    421.08    934.74    452.97 <
      4408    1   6   9  11    599.88    717.42    586.51 <
      4409    1   7   9  11      2.01     47.13    583.89 <
      4410    1   8   9  11    287.28   -235.65    518.43 <
      4411    1   9   9  11     19.14    746.22    670.29 <
      4412    1  -1  10  11    842.36    691.24    646.73 <
      4413    1   0  10  11     95.45     44.51    623.16 <
      4414    1   1  10  11    522.68    227.79    594.36 <
      4415    1   2  10  11    116.90     60.22    523.66 <
      4416    1   3  10  11    859.52   1128.50    644.11 <
      4417    1   4  10  11     17.53    -15.71    397.98 <
      4418    1   5  10  11    119.60    175.43    421.55 <
      4419    1   6  10  11    334.28   1152.06    625.78 <
      4420    1   7  10  11    454.23    675.53    675.53 <
      4421    1   8  10  11     26.07   1508.15    790.73 <
      4422    3   0  11  11   1330.12    620.54    706.95 <
      4422    2   0  11  11   1330.12    620.54    706.95 <
      4422    1   0  11  11   1330.12    620.54    706.95 <
      4423    1   1  11  11     79.87   -536.76    560.32 <
      4424    3  -1  11   8   1419.47   3257.20    837.86 o
      4424    2  -1   9  12   1419.47   3257.20    837.86 o
      4424    1   2  11  11   1419.47   3257.20    837.86 o
      4425    1   3  11  11     18.97   -382.27    573.41 <
      4426    3  -2  11   5    368.37     41.89    657.20 <
      4426    2  -2   7  13    368.37     41.89    657.20 <
      4426    1   4  11  11    368.37     41.89    657.20 <
      4427    1   5  11  11     31.75    230.41    476.54 <
      4428    3  -3  11   2    239.79   1272.51    754.08 <
      4428    2  -3   5  14    239.79   1272.51    754.08 <
      4428    1   6  11  11    239.79   1272.51    754.08 <
      4429    1   7  11  11     29.40   1565.76    816.92 <
      4430    1   3  12  11     29.49   -479.15    644.11 <
      4431    1   4  12  11     42.82    293.25    714.80 <
      4432    1  -3  -7  12      1.66    850.96    699.09 <
      4433    1  -2  -7  12   1263.13   1751.66    740.99 <
      4434    1  -1  -7  12     42.39    866.66    657.20 <
      4435    1   0  -7  12     61.24   -251.36    555.09 <
      4436    1   1  -7  12     25.79    633.63    565.56 <
      4437    1   2  -7  12    129.96   -225.18    408.46 <
      4438    1   3  -7  12    353.92    162.34    654.58 <
      4439    3  11   6   3   6420.18   6380.86   1256.80 o
      4439    2  -7   4 -11   6420.18   6380.86   1256.80 o
      4439    1  -4  -6  12   6420.18   6380.86   1256.80 o
      4440    1  -3  -6  12    125.11   -217.32    657.20 <
      4441    3  10   6   0  17362.60  16838.40   1749.04 o
      4441    2  -8   2 -10  17362.60  16838.40   1749.04 o
      4441    1  -2  -6  12  17362.60  16838.40   1749.04 o
      4442    1  -1  -6  12     56.74    -70.69    500.10 <
      4443    3   9   6  -3  35859.90  37468.20   3118.42 o
      4443    2  -9   0  -9  35859.90  37468.20   3118.42 o
      4443    1   0  -6  12  35859.90  37468.20   3118.42 o
      4444    1   1  -6  12    114.21   -536.76    452.97 <
      4445    3   8   6  -6  12219.60  11921.20    895.47 o
      4445    2 -10  -2  -8  12219.60  11921.20    895.47 o
      4445    1   2  -6  12  12219.60  11921.20    895.47 o
      4446    1   3  -6  12     38.83    128.30    379.66 <
      4447    3   7   6  -9   1881.64   1474.12    686.00 <
      4447    2 -11  -4  -7   1881.64   1474.12    686.00 <
      4447    1   4  -6  12   1881.64   1474.12    686.00 <
      4448    1  -5  -5  12     49.60    322.05    733.13 <
      4449    1  -4  -5  12   1624.98   3066.06    913.79 o
      4450    1  -3  -5  12    513.78    489.63    612.69 <
      4451    1  -2  -5  12    261.40    -10.47    651.96 <
      4452    1  -1  -5  12      6.76    688.62    620.54 <
      4453    1   0  -5  12    306.51    141.39    521.05 <
      4454    1   1  -5  12    404.78    387.51    468.68 <
      4455    1   2  -5  12    530.42    293.25    369.18 <
      4456    1   3  -5  12    292.76    172.81    353.47 <
      4457    1   4  -5  12    160.60     94.26    539.38 <
      4458    1   5  -5  12     76.86   1000.20    549.85 <
      4459    1  -6  -4  12    457.26    374.42    775.02 <
      4460    1  -5  -4  12    284.48    458.21    523.66 <
      4461    1  -4  -4  12     31.34    -62.84    659.82 <
      4462    1  -3  -4  12    572.49    369.18    665.05 <
      4463    1  -2  -4  12     12.96   -447.73    578.65 <
      4464    1  -1  -4  12   2369.20   2374.82    717.42 o
      4465    1   0  -4  12    341.95    285.40    518.43 <
      4466    1   1  -4  12    323.59     57.60    348.24 <
      4467    1   2  -4  12      0.41    329.91    343.00 <
      4468    1   3  -4  12     18.06     52.37    353.47 <
      4469    1   4  -4  12    131.77    178.05    285.40 <
      4470    1   5  -4  12     51.36   -115.21    361.33 <
      4471    1   6  -4  12      3.32    277.54    361.33 <
      4472    1  -6  -3  12     10.48    272.31    738.37 <
      4473    3  10   7   7   4820.64   6435.84    858.81 o
      4473    2  -5   7  -8   4820.64   6435.84    858.81 o
      4473    1  -5  -3  12   4820.64   6435.84    858.81 o
      4474    1  -4  -3  12    257.23   -214.70    450.35 <
      4475    3   9   7   4   7162.31   7312.98    866.66 o
      4475    2  -6   5  -7   7162.31   7312.98    866.66 o
      4475    1  -3  -3  12   7162.31   7312.98    866.66 o
      4476    1  -2  -3  12    191.89    437.26    578.65 <
      4477    3   8   7   1  30359.90  30178.80   2639.27 o
      4477    2  -7   3  -6  30359.90  30178.80   2639.27 o
      4477    1  -1  -3  12  30359.90  30178.80   2639.27 o
      4478    1   0  -3  12    111.01    761.93    534.14 <
      4479    3   7   7  -2  38544.30  41181.00   2293.65 o
      4479    2  -8   1  -5  38544.30  41181.00   2293.65 o
      4479    1   1  -3  12  38544.30  41181.00   2293.65 o
      4480    1   2  -3  12     75.54    -81.17    308.96 <
      4481    3   6   7  -5   5106.58   4490.43    528.90 o
      4481    2  -9  -1  -4   5106.58   4490.43    528.90 o
      4481    1   3  -3  12   5106.58   4490.43    528.90 o
      4482    1   4  -3  12     82.29    290.63    311.58 <
      4483    3   5   7  -8   5276.04   6022.15    596.98 o
      4483    2 -10  -3  -3   5276.04   6022.15    596.98 o
      4483    1   5  -3  12   5276.04   6022.15    596.98 o
      4484    1   6  -3  12    165.46    858.81    340.38 <
      4485    3   4   7 -11   2870.77   3016.31    463.44 o
      4485    2 -11  -5  -2   2870.77   3016.31    463.44 o
      4485    1   7  -3  12   2870.77   3016.31    463.44 o
      4486    1  -6  -2  12      1.80    185.90    686.00 <
      4487    1  -5  -2  12   1073.83   1382.47    725.28 <
      4488    1  -4  -2  12     60.15   -230.41    432.02 <
      4489    1  -3  -2  12    954.93   1343.20    473.92 <
      4490    1  -2  -2  12     34.16    604.83    426.79 <
      4491    1  -1  -2  12    138.40    225.18    505.34 <
      4492    1   0  -2  12    425.91    201.61    487.01 <
      4493    1   1  -2  12    817.66    955.69    332.53 <
      4494    1   2  -2  12     70.18    -62.84    285.40 <
      4495    1   3  -2  12      6.02   -225.18    280.16 <
      4496    1   4  -2  12    108.87    288.02    322.05 <
      4497    1   5  -2  12     97.25    136.15    214.70 <
      4498    1   6  -2  12     36.58    -83.79    324.67 <
      4499    1   7  -2  12      1.75    -34.04    353.47 <
      4500    1   8  -2  12     20.14    659.82    377.04 <
      4501    1  -5  -1  12   1336.83    523.66    610.07 <
      4502    1  -4  -1  12      3.60    201.61    452.97 <
      4503    1  -3  -1  12     97.50    395.37    400.60 <
      4504    1  -2  -1  12   3926.24   4584.69    620.54 o
      4505    1  -1  -1  12    273.88    -65.46    337.76 <
      4506    1   0  -1  12    574.53    -44.51    515.81 <
      4507    1   1  -1  12    275.97    149.24    473.92 <
      4508    1   2  -1  12    607.31    827.39    303.73 <
      4509    1   3  -1  12     17.31    206.85    314.20 <
      4510    1   4  -1  12    162.74   -353.47    303.73 <
      4511    1   5  -1  12     43.53    120.44    235.65 <
      4512    1   6  -1  12    201.55     -5.24    316.82 <
      4513    1   7  -1  12     13.24   -369.18    363.95 <
      4514    1   8  -1  12    501.74    641.49    387.51 <
      4515    3   9   8  11   3778.21   2940.38    879.76 o
      4515    2  -3  10  -5   3778.21   2940.38    879.76 o
      4515    1  -6   0  12   3778.21   2940.38    879.76 o
      4516    3   8   8   8  12619.30  15657.60   1869.48 o
      4516    2  -4   8  -4  12619.30  15657.60   1869.48 o
      4516    1  -4   0  12  12619.30  15657.60   1869.48 o
      4517    1  -3   0  12    700.55    882.38    628.40 <
      4518    3   7   8   5  24945.20  24965.70   2243.90 o
      4518    2  -5   6  -3  24945.20  24965.70   2243.90 o
      4518    1  -2   0  12  24945.20  24965.70   2243.90 o
      4519    1  -1   0  12     62.30    157.10    492.24 <
      4520    3   6   8   2  61113.00  63195.90   3461.42 o
      4520    2  -6   4  -2  61113.00  63195.90   3461.42 o
      4520    1   0   0  12  61113.00  63195.90   3461.42 o
      4521    1   1   0  12    124.53    -70.69    437.26 <
      4522    3   5   8  -1   6866.56   6786.70    657.20 o
      4522    2  -7   2  -1   6866.56   6786.70    657.20 o
      4522    1   2   0  12   6866.56   6786.70    657.20 o
      4523    1   3   0  12     53.39    227.79    282.78 <
      4524    3   4   8  -4   1395.17   1167.77    322.05 o
      4524    2  -8   0   0   1395.17   1167.77    322.05 o
      4524    1   4   0  12   1395.17   1167.77    322.05 o
      4525    1   5   0  12      3.49      7.85    301.11 <
      4526    3   3   8  -7   4485.31   3864.65    371.80 o
      4526    2  -9  -2   1   4485.31   3864.65    371.80 o
      4526    1   6   0  12   4485.31   3864.65    371.80 o
      4527    1   7   0  12     56.94   -144.01    272.31 <
      4528    3   2   8 -10   2340.93   2317.22    439.88 o
      4528    2 -10  -4   2   2340.93   2317.22    439.88 o
      4528    1   8   0  12   2340.93   2317.22    439.88 o
      4529    1   9   0  12    225.78   -458.21    505.34 <
      4530    1  -6   1  12    138.33   -714.80    539.38 <
      4531    1  -5   1  12    394.45   2018.73    617.92 o
      4532    1  -4   1  12    371.37   1660.02    667.67 <
      4533    1  -3   1  12      1.74     62.84    390.13 <
      4534    1  -2   1  12    121.62    -39.27    384.89 <
      4535    1  -1   1  12   1092.82    521.05    350.86 <
      4536    1   0   1  12    125.57     13.09    314.20 <
      4537    1   1   1  12   1148.70    439.88    366.57 <
      4538    1   2   1  12    569.24    437.26    327.29 <
      4539    1   3   1  12     29.20    672.91    327.29 <
      4540    1   4   1  12    735.46    492.24    324.67 <
      4541    1   5   1  12     14.89    125.68    261.83 <
      4542    1   6   1  12      0.29   -144.01    264.45 <
      4543    1   7   1  12    385.06    395.37    308.96 <
      4544    1   8   1  12     61.39    120.44    484.39 <
      4545    1   9   1  12      2.05   -701.71    473.92 <
      4546    1  -6   2  12    943.53    405.84    599.60 <
      4547    1  -5   2  12      3.79    481.77    565.56 <
      4548    1  -4   2  12    823.97   1594.56    651.96 <
      4549    1  -3   2  12    727.52    157.10    397.98 <
      4550    1  -2   2  12    229.94    837.86    442.50 <
      4551    1  -1   2  12   4578.88   4430.20    607.45 o
      4552    1   0   2  12   2023.96   1937.56    452.97 o
      4553    1   1   2  12    175.91   -172.81    358.71 <
      4554    1   2   2  12    164.62   -316.82    447.73 <
      4555    1   3   2  12     33.31    345.62    303.73 <
      4556    1   4   2  12    290.42     86.40    240.89 <
      4557    1   5   2  12    156.23    350.86    251.36 <
      4558    1   6   2  12    740.47    830.01    316.82 <
      4559    1   7   2  12    765.40    879.76    324.67 <
      4560    1   8   2  12      0.17    -31.42    306.34 <
      4561    1   9   2  12     40.90   -261.83    463.44 <
      4562    1  -6   3  12     22.49    -60.22    604.83 <
      4563    3   7   9  12   5770.75   4527.08    929.51 o
      4563    2  -2  11  -1   5770.75   4527.08    929.51 o
      4563    1  -5   3  12   5770.75   4527.08    929.51 o
      4564    1  -4   3  12    412.72    858.81    691.24 <
      4565    3   6   9   9   2490.02   3168.17    798.59 o
      4565    2  -3   9   0   2490.02   3168.17    798.59 o
      4565    1  -3   3  12   2490.02   3168.17    798.59 o
      4566    1  -2   3  12    499.87    -52.37    377.04 <
      4567    3   5   9   6  29876.90  31558.70   1921.85 o
      4567    2  -4   7   1  29876.90  31558.70   1921.85 o
      4567    1  -1   3  12  29876.90  31558.70   1921.85 o
      4568    1   0   3  12     98.74    214.70    353.47 <
      4569    3   4   9   3  26336.80  29183.80   1769.99 o
      4569    2  -5   5   2  26336.80  29183.80   1769.99 o
      4569    1   1   3  12  26336.80  29183.80   1769.99 o
      4570    1   2   3  12     55.62   -280.16    324.67 <
      4571    3   3   9   0    792.92   -240.89    455.59 <
      4571    2  -6   3   3    792.92   -240.89    455.59 <
      4571    1   3   3  12    792.92   -240.89    455.59 <
      4572    1   4   3  12    172.64   -125.68    311.58 <
      4573    3   2   9  -3   5548.04   5493.24    432.02 o
      4573    2  -7   1   4   5548.04   5493.24    432.02 o
      4573    1   5   3  12   5548.04   5493.24    432.02 o
      4574    1   6   3  12     15.33   -316.82    233.03 <
      4575    3   1   9  -6   8733.97   8525.26    654.58 o
      4575    2  -8  -1   5   8733.97   8525.26    654.58 o
      4575    1   7   3  12   8733.97   8525.26    654.58 o
      4576    1   8   3  12     66.32    369.18    329.91 <
      4577    3   0   9  -9  11526.20  13274.90    858.81 o
      4577    2  -9  -3   6  11526.20  13274.90    858.81 o
      4577    1   9   3  12  11526.20  13274.90    858.81 o
      4578    1  -5   4  12      1.63    -31.42    494.86 <
      4579    1  -4   4  12     91.98     13.09    526.28 <
      4580    1  -3   4  12    217.69    112.59    581.27 <
      4581    1  -2   4  12    285.99    -81.17    429.40 <
      4582    1  -1   4  12     16.84     62.84    379.66 <
      4583    1   0   4  12    731.21    397.98    390.13 <
[truncated: 57,542 more chars]
